# Supplementary material for: Monitoring single-cell dynamics of entry into quiescence during an unperturbed life cycle
Source: eLife. 2021 Nov 1;10:e73186. doi: 10.7554/eLife.73186 (PMC8594939; doi:10.7554/eLife.73186)
Supplement: Figure 1—source data 1. [file elife-73186-fig1-data1.xlsx]

## Sheet: Figure 1C
Time (h)	Number of cells
0	11
0.25	12
0.5	16
0.75	18
1	20
1.25	22
1.5	26
1.75	27
2	31
2.25	35
2.5	36
2.75	43
3	44
3.25	48
3.5	55
3.75	62
4	67
4.25	74
4.5	80
4.75	87
5	99
5.25	104
5.5	116
5.75	123
6	127
6.25	129
6.5	135
6.75	138
7	138
7.25	138
7.5	138
7.75	137
8	138
8.25	138
8.5	138
8.75	138
9	138
9.25	137
9.5	138
9.75	138
10	137
10.25	137
10.5	138
11.25	137
12	138
12.75	138
13.5	138
14.25	138
15	142
15.75	146
16.5	146
17.25	151
18	151
18.75	152
19.5	150
20.25	154
21	159
21.75	160
22.5	164
23.25	170
24	171
24.75	173
25	174
26	184
30	189
35	191
40	193
45	193
50	194
55	195
60	195
65	195
70	195
75	195
80	195
85	195
90	195
95	195
98	195
104	195
108	195
117	195
133	195
139	195
145	195
151	195
157	195
163	195
169	195
175	195
181	195
187	195
193	195
199	195
205	195
211	195
217	195
223	195
229	195
235	195

## Sheet: Figure 1D - R+ cells
pH versus time (h); Each row represents a single cell; Each column represents a time point
	7.65624	7.50709	7.30968	6.9838	6.75552	6.77537	6.7502	6.8137	6.76907	6.85236	6.84574	6.87952	6.81438	6.88108	6.91989	6.80286	6.86827	6.87531	6.87346	6.9049	6.89514	6.8582	6.92085	6.93224	6.89529	6.81024	6.84628	6.88166	6.81615	6.83905	6.81199	6.85777	6.831	6.80583	6.81417	6.83663	6.78697	6.81313	6.78955	6.7938	6.73992	6.75804	6.75112	6.77	6.81555	6.76403	6.76571	6.69303	6.6728
7.60945	7.63755	7.50013	7.30777	6.96582	6.75122	6.78607	6.79336	6.82726	6.84862	6.85526	6.85655	6.87649	6.89684	6.88868	6.91511	6.8683	6.89744	6.87078	6.89786	6.89113	6.91648	6.89473	6.87821	6.83976	6.85317	6.819	6.82618	6.77933	6.76708	6.75667	6.73068	6.76096	6.77828	6.783	6.75021	6.74157	6.76758	6.7909	6.75436	6.72417	6.7421	6.75324	6.78045	6.76857	6.75482	6.77823	6.77821	6.69818	6.6514
7.65065	7.73672	7.61357	7.44894	7.06534	6.71337	6.82042	6.79869	6.78745	6.78539	6.85146	6.86235	6.85204	6.86066	6.88329	6.9331	6.93876	6.93986	6.94378	6.94558	6.97074	6.97818	6.98021	6.96414	6.96137	6.91912	6.88303	6.88295	6.88873	6.88668	6.87983	6.86027	6.89853	6.86475	6.83926	6.90504	6.92885	6.97819	6.98559	7.00468	6.94305	6.9444	6.8886	6.93012	6.98167	6.96286	6.98765	6.95046	6.85627	6.81712
		7.58885	7.44146	7.23213	6.96274	7.0108	6.92232	6.98967	6.97557	6.98714	6.97079	6.97465	7.03062	7.06617	7.04196	7.05203	7.04736	7.06048	6.96857	7.04706	7.03679	6.99586	7.00713	7.03144	6.96539	6.93334	6.92574	6.93391	6.91072	6.91354	6.88828	6.827	6.87516	6.82598	6.81872	6.80632	6.84759	6.76687	6.78302	6.82013	6.82737	6.79323	6.77391	6.79504	6.78589	6.71062	6.73364	6.63646	6.55983
		7.54125	7.50497	7.06155	6.83899	6.92308	6.96931	7.04307	7.11518	7.09008	7.05384	7.07143	7.07987	7.08432	7.04574	7.07622	7.0539	7.02763	7.02842	6.98745	6.95536	7.01989	7.02663	6.99935	6.93289	6.89988	6.89446	6.926	6.89564	6.9719	6.96364	6.94549	7.02646	6.95794	6.85008	6.82068	6.89144	6.64125	6.64385	6.74662	6.74825	6.77373	6.80243	6.82538	6.88009	6.88489	6.86529	6.77762	6.76205
	7.64832	7.59873	7.43322	7.20002	6.91387	6.95703	6.9528	6.94439	7.00339	7.02645	7.10186	7.06666	7.08358	7.09942	7.06456	7.04125	7.06512	7.05032	7.03731	7.04392	7.07545	7.07496	7.05259	7.05622	7.04451	7.02855	7.01108	6.9964	6.98237	6.97613	6.99942	7.04827	7.02773	6.91277	6.89194	6.95459	6.98674	6.94007	6.96878	6.95629	6.98423	6.98897	6.95419	6.94039	6.84784	6.88442	6.86068	6.80883	6.75725
			7.4733	7.17025	6.97716	6.98227	7.01401	6.96371	7.06083	7.08128	7.05225	7.02399	7.04817	6.97577	7.00875	6.99512	7.09016	7.12367	7.05367	7.00592	7.01267	7.06882	7.01439	6.96685	6.97858	6.8413	6.90362	6.92827	6.93555	6.88181	6.92462	6.90662	6.87805	6.80464	6.76044	6.79169	6.90278	6.89419	6.93394	6.94197	6.91599	6.89439	6.89367	6.91506	6.85677	6.82123	6.86244	6.87759	6.77484
		7.56663	7.45107	7.01152	6.83462	6.73025	6.67628	6.58016	6.74565	6.76135	6.81236	6.83626	6.93834	6.93205	7.05032	7.08058	7.0347	7.03278	7.05704	7.01117	7.08213	7.0997	7.08722	7.03604	7.00951	6.99673	6.9921	6.9785	6.99505	6.96537	6.98347	7.02996	6.9436	6.98795	6.95163	6.99107	6.9484	6.9791	6.99015	6.95887	6.97279	6.95151	6.99681	7.02685	6.95307	6.92151	6.93133	6.85706	6.81967
		7.65423	7.49114	7.23804	6.99594	6.96957	6.95372	6.98287	6.98403	7.00601	6.99492	7.03522	7.02992	7.06073	7.03407	7.05596	7.09838	7.08606	7.05884	7.15247	7.10377	7.12614	7.13229	7.1538	7.14426	7.10458	7.05008	7.04664	7.04486	7.02712	7.02489	6.97959	6.9777	6.97163	7.01678	6.92882	6.93219	6.91878	6.9149	6.9319	6.94689	6.88316	6.92794	6.89326	6.88079	6.83189	6.80705	6.76157	6.70723
	7.61175	7.57121	7.45055	7.1598	6.8741	6.91786	6.89981	6.8872	6.83665	6.952	7.04913	6.98764	6.98685	7.04351	7.0766	7.11357	7.09822	7.06133	7.06995	7.04159	7.1083	7.13376	7.06958	7.02808	7.06093	7.03637	6.98961	7.01186	6.88865	6.89824	6.94286	6.82696	6.86127	6.85801	6.84443	6.85117	6.86133	6.8675	6.84873	6.86817	6.87031	6.85716	6.79529	6.78443	6.79894	6.75154	6.77702	6.65978	6.63292
			7.58449	7.32472	7.02925	6.9795	6.95633	6.95582	6.91277	6.94296	6.9045	6.89974	6.94114	6.9908	7.00496	6.99458	7.00396	7.06931	7.07028	6.97773	6.9841	6.99757	7.00632	6.97541	6.92338	6.96109	6.91694	6.94213	6.91727	6.92209	6.87854	6.95614	6.90837	6.89032	6.91543	6.81197	6.79743	6.79544	6.79961	6.81081	6.8106	6.76771	6.77651	6.73449	6.74074	6.774	6.72186	6.69365	6.67288
	7.76099	7.60524	7.41383	7.1586	6.98316	7.07109	7.03981	7.02112	7.13863	7.17866	7.14754	7.12384	7.10914	7.11023	7.13402	7.13724	7.05833	7.1076	7.08236	7.12008	7.09439	7.10316	7.0705	7.03609	7.00696	7.04643	7.03746	7.01586	7.00985	7.02935	6.98744	6.91507	6.90313	6.90194	6.96185	6.98096	6.95043	6.92573	6.91338	6.91199	6.88817	6.90428	6.91419	6.85946	6.94157	6.90675	6.89703	6.792	6.83132
			7.63397	7.24301	6.97327	6.9738	7.0534	6.96919	6.9863	7.02429	7.06579	7.10907	7.08592	7.15444	7.17379	7.13132	7.12467	7.14195	7.09941	7.1068	7.13014	6.99481	7.0714	7.029	7.00687	7.00879	6.91869	6.86508	6.97751	6.95778	6.97783	6.92782	6.86093	6.87448	6.86854	6.88858	6.88328	6.86984	6.86408	6.80348	6.83649	6.77009	6.83131	6.81894	6.82898	6.7891	6.83237	6.73756	6.63392
			7.42001	7.14957	6.87238	6.92516	6.86926	6.92758	6.94789	6.97896	6.95792	7.01996	7.01038	7.02432	7.11697	7.03931	7.06217	7.09175	7.10028	7.08549	7.12593	7.17613	7.13587	7.14809	7.06601	7.05647	7.06388	7.00461	6.93616	6.93432	6.9625	6.95607	6.9341	6.90762	6.86204	6.81453	6.90149	6.85356	6.88915	6.86069	6.86409	6.89294	6.82322	6.82997	6.82084	6.81577	6.75926	6.7227	6.60741
	7.61946	7.57651	7.4162	7.089	6.81249	6.80964	6.79262	6.80735	6.77001	6.72375	6.66065	6.79787	6.82074	6.88981	6.9752	7.00679	7.08319	7.04182	7.1055	7.11822	7.04328	7.06526	7.1082	7.00948	7.0075	6.99584	6.98296	6.96465	6.93803	6.95397	6.95445	6.89566	6.9244	6.8537	6.85335	6.82291	6.83667	6.81269	6.79774	6.80314	6.80222	6.80289	6.75481	6.74053	6.75298	6.80494	6.77083	6.66848	6.65874
7.82014	7.68834	7.59132	7.44042	7.08222	6.91119	6.93145	6.96605	6.39664	7.06443	7.07599	7.0616	7.01703	7.06128	7.02698	7.03387	7.14242	7.10735	7.07715	7.10791	7.10497	7.12823	7.21206	7.16694	7.10491	7.11417	7.06428	7.00461	6.99664	7.03993	7.01891	6.99566	6.9642	6.90341	6.9632	7.03432	6.99524	7.01436	6.98524	6.94021	6.95509	6.95683	6.85197	6.86803	6.89956	6.90047	6.89944	6.87496	6.79652	6.71568
	7.75154	7.5705	7.39232	7.0299	6.87959	6.96887	6.9362	6.93156	6.93215	7.01214	6.97951	6.99485	7.0609	7.0531	7.0691	7.10376	7.01031	7.09036	7.11903	7.06091	7.17253	7.17451	7.26095	7.21903	7.13889	7.07117	7.01202	7.02001	7.00289	7.01739	6.95932	6.94014	6.93201	6.93221	6.94311	6.93182	6.9476	6.86996	6.85396	6.90571	6.87576	6.94048	6.95785	6.91323	6.98954	6.93682	6.95404	6.83131	6.86368
	7.60979	7.47697	7.2968	6.83582	6.65529	6.67713	6.60551	6.56197	6.66555	6.71911	6.73983	6.82083	6.90458	7.00316	7.06261	7.06117	7.10416	7.13488	7.12297	7.09386	7.0983	7.16118	7.25601	7.26388	7.15101	7.11146	7.1651	7.1041	7.10719	7.1119	7.00053	6.97283	6.95628	6.94872	6.95245	6.96937	6.97432	6.88443	6.92444	6.94315	6.936	6.96256	6.91032	6.88259	6.88422	6.89179	6.88303	6.81901	6.76148
			7.52787	7.12944	6.94149	6.98846	7.14994	7.14798	7.16496	7.22846	7.16523	7.23302	7.22816	7.23755	7.23523	7.18844	7.23117	7.21063	7.13168	7.18079	7.16712	7.19926	7.2479	7.1896	7.17693	7.21869	7.19479	7.14848	7.17024	7.06572	7.11672	7.0927	7.05671	7.02325	7.02826	7.03758	6.96281	6.98437	7.02297	6.97595	6.9835	6.94369	6.95636	6.90711	6.92565	6.89887	6.89832	6.81667	6.80304
7.6809	7.71774	7.60281	7.45797	7.08051	6.86206	6.85419	6.95267	6.97834	6.99892	7.10047	7.06854	7.07363	7.09487	7.10446	7.08879	7.10575	7.14595	7.13124	7.13235	7.08439	7.08067	7.05534	7.10721	7.08968	7.09388	7.0674	7.02786	6.95836	6.97347	6.95637	6.98133	6.94979	6.97298	6.92053	6.8932	6.86321	6.8765	6.89249	6.87252	6.87442	6.88688	6.86238	6.86406	6.88036	6.88313	6.86457	6.82456	6.75103	6.73406
			7.40827	7.03077	6.75306	6.72582	6.82216	6.90527	6.87223	6.96428	6.92955	7.00154	7.05903	7.11421	7.2103	7.22119	7.22159	7.18428	7.1333	7.13669	7.1342	7.15444	7.14948	7.05794	7.04429	7.02185	7.01117	7.00592	6.98287	6.96272	6.91745	6.94387	6.9389	6.93333	6.92843	6.85348	6.89339	6.84428	6.82978	6.86755	6.87925	6.89311	6.83784	6.85119	6.86079	6.82502	6.78294	6.77942	6.72578
		7.56774	7.46648	7.30875	7.05875	6.94499	6.93	7.03398	7.00685	7.11987	7.11895	7.13035	7.17033	7.19002	7.2218	7.2042	7.21777	7.14903	7.13723	7.13846	7.13592	7.10797	7.15762	7.09279	7.0213	6.97957	6.98447	6.96871	6.94802	6.91446	6.98964	6.94824	6.85991	6.89636	6.82542	6.86419	6.9001	6.90332	6.8756	6.90145	6.85814	6.81902	6.79436	6.86538	6.86521	6.85196	6.88165	6.82561	6.73414
	7.57028	7.59971	7.42205	7.11041	6.94	6.92349	6.88337	6.95172	6.9466	7.04116	7.03694	7.08306	7.07259	7.07561	7.14463	7.1176	7.10447	7.08785	7.14392	7.15938	7.10186	7.0969	7.05929	7.04873	7.06925	7.03501	7.07577	7.09783	7.08401	7.09404	7.15103	7.09516	7.07404	6.99667	7.02613	6.99973	6.97119	6.84323	6.85142	6.92977	6.9771	6.9379	6.90177	6.94642	6.87513	6.87155	6.87643	6.80067	6.73306
7.68046	7.659	7.60097	7.3577	7.00845	6.73955	6.77302	6.77287	6.74173	6.71803	6.74222	6.80805	6.96675	6.95694	7.10978	7.05859	7.10227	7.13114	7.17087	7.14657	7.12838	7.23272	7.18463	7.11725	7.12238	7.09178	7.0435	7.02511	6.97714	6.95794	6.95504	6.951	6.95717	6.94009	6.92208	6.90417	6.85138	6.84624	6.88075	6.90703	6.85073	6.88497	6.89486	6.86221	6.82256	6.8489	6.86098	6.83594	6.77408	6.76515
		7.57496	7.45095	7.16236	6.79939	6.84423	6.8624	6.83568	6.82577	6.8098	6.87828	6.93411	7.02958	7.03666	7.07717	7.13357	7.08904	7.09463	7.14945	7.18396	7.20464	7.18568	7.17629	7.15119	7.12687	7.16512	7.08692	7.02285	6.98572	7.01657	6.98238	6.95405	6.93216	6.91878	6.89707	6.87873	6.878	6.87495	6.85825	6.88252	6.87911	6.88964	6.90007	6.88496	6.86994	6.81961	6.82376	6.70124	6.71803
7.76991	7.68218	7.63549	7.45669	7.03579	6.83786	6.9607	7.05102	7.11011	7.11164	7.15685	7.15455	7.17487	7.09016	7.11822	7.09077	7.0941	7.15211	7.12564	7.1515	7.10907	7.17857	7.16649	7.16255	7.18353	7.18635	7.12543	7.08813	7.0949	7.11298	7.08655	7.05635	7.07687	7.03027	7.03875	7.02363	7.12143	7.1255	7.16097	7.16031	7.18112	7.07428	7.08592	7.03306	7.0138	6.95196	6.96761	6.95664	6.86772	6.90743
		7.59771	7.5295	7.1957	6.82298	6.77783	6.73008	6.73414	6.80802	6.8648	6.88969	7.03422	7.01313	7.06845	7.05665	7.02485	7.11687	7.1272	7.16362	7.19376	7.15856	7.21619	7.12113	7.14305	7.0748	7.03393	6.96262	6.84012	6.86647	6.93638	6.98163	6.8511	6.90198	6.91839	6.88584	6.87444	6.79866	6.84237	6.87183	6.84172	6.85659	6.83714	6.82094	6.83313	6.83226	6.84416	6.8402	6.77106	6.72331
7.66026	7.62302	7.58287	7.42477	7.075	6.8507	6.87376	6.93143	7.03003	7.06608	7.08628	7.0426	7.0595	7.11631	7.13125	7.11735	7.08742	7.14452	7.15362	7.16784	7.13885	7.15675	7.13583	7.1148	7.09359	7.04439	7.05187	7.0362	7.0058	7.01269	6.96966	6.94891	6.9076	6.90408	6.88332	6.92559	6.87432	6.90988	6.91586	6.89464	6.92426	6.88173	6.86201	6.85319	6.84825	6.86495	6.83111	6.79968	6.74514	6.72025
			7.32191	7.01897	6.8368	6.87655	6.94677	7.06976	7.04387	7.02424	6.98359	7.02027	7.11472	7.12884	7.16896	7.16317	7.18705	7.1371	7.1835	7.15018	7.08422	7.06845	7.11704	7.05908	6.99585	7.01724	7.03072	7.01175	6.98903	7.05617	7.00563	6.9946	6.94367	6.92664	6.89554	6.95137	6.92926	6.92977	6.97732	6.81887	6.85991	6.89	6.91637	6.85714	6.88049	6.85211	6.82705	6.77917	6.69493
7.65991	7.63864	7.60805	7.45742	6.99122	6.80926	6.84382	6.8168	6.8784	6.90972	7.00006	7.07929	7.16689	7.19331	7.223	7.23072	7.18951	7.15811	7.19746	7.18743	7.2097	7.17885	7.1748	7.1352	7.08047	7.09082	7.08642	7.01758	7.02903	6.98281	6.97006	6.96844	6.97931	6.96201	6.90359	6.91628	6.8766	6.90198	6.8965	6.88398	6.86513	6.93967	6.92813	6.90316	6.87912	6.8978	6.91047	6.96112	6.81163	6.82184
			7.40887	7.00975	6.82196	6.78853	6.81613	6.81333	6.93128	7.04735	7.02925	7.19197	7.20306	7.20898	7.21404	7.20961	7.15154	7.20714	7.19537	7.20315	7.21796	7.16289	7.10855	7.09506	6.99059	6.90623	6.93629	6.95502	6.89855	6.94791	6.92036	6.89668	6.88405	6.89148	6.88654	6.86384	6.7736	6.72039	6.72047	6.70638	6.73332	6.79177	6.74929	6.74474	6.78608	6.73862	6.74888	6.66858	6.68156
	7.64602	7.55813	7.47449	7.16681	6.95456	6.99316	7.03639	7.10152	7.07682	7.07392	7.14259	7.11592	7.08921	7.0934	7.18699	7.17092	7.1734	7.18569	7.19874	7.26639	7.28156	7.22222	7.26104	7.29268	7.1403	7.12197	7.09649	7.08928	7.06754	7.02179	7.00712	7.01038	7.00058	6.9722	6.94617	6.93429	6.98	6.92458	6.91927	6.89783	6.91498	6.87718	6.85472	6.8708	6.87248	6.85555	6.87818	6.76288	6.72113
7.8296	7.81349	7.739	7.55861	7.1893	6.89247	6.96494	6.99409	7.02099	7.03422	7.09787	7.04071	7.08443	7.09249	7.08234	7.10736	7.13285	7.1549	7.17572	7.23286	7.19243	7.17584	7.22254	7.19638	7.16618	7.16933	7.15483	7.13769	7.11113	7.09285	7.09404	7.06259	7.03894	7.04938	7.03993	7.03926	7.06068	7.04443	7.0077	7.01069	7.05201	7.01078	7.02189	7.03144	7.01931	6.9697	7.04502	6.95702	6.92354	6.91536
	7.71329	7.69292	7.54107	7.2015	6.88151	6.93498	6.98354	6.99784	7.04806	6.98801	7.03135	7.06529	7.09788	7.11539	7.06013	7.12734	7.14811	7.19878	7.23737	7.25879	7.25121	7.23689	7.21823	7.19358	7.09441	7.09237	7.11944	7.04065	7.07626	7.06097	7.05999	7.00225	6.98213	6.97289	6.92712	6.91764	6.90883	6.90521	6.94762	6.90085	6.87185	6.90553	6.88415	6.86094	6.84564	6.8084	6.82736	6.75739	6.73122
									7.25718	7.19629	7.16246	7.17957	7.26561	7.15427	7.24685	7.22199	7.1199	7.23093	7.24297	7.21342	7.23465	7.25341	7.25651	7.31127	7.23512	7.20394	7.19383	7.22017	7.17835	7.13034	7.14915	7.17575	7.16355	7.15021	7.16138	7.01508	7.06539	7.01809	7.05664	7.03025	6.96697	7.00361	6.95776	6.95519	6.90096	6.96146	6.884	6.83282	6.8323
															7.03665	7.121	7.24839	7.30496	7.25911	7.30392	7.35804	7.30711	7.27596	7.29392	7.29318	7.26928	7.13974	7.10657	7.0502	7.12124	7.06561	7.00588	6.96289	6.90964	6.92503	6.94674	6.89443	6.8205	6.83827	6.84706	6.81801	6.83985	6.84391	6.81311	6.81845	6.84267	6.82323	6.80848	6.79643
7.70868	7.73718	7.63579	7.43076	7.05208	6.86619	6.89921	7.00627	7.04683	7.03659	7.06014	7.13372	7.12854	7.12876	7.13831	7.14375	7.21562	7.25218	7.25002	7.26371	7.26847	7.22783	7.26877	7.26024	7.27747	7.20397	7.19062	7.14344	7.02946	7.07513	7.09533	7.07425	6.95949	6.96235	6.98206	6.97561	6.97013	6.93408	6.92432	6.94785	6.91106	6.92062	6.93036	6.91712	6.90163	6.90673	6.88923	6.88497	6.79139	6.778
	7.96064	7.21122	7.4809	7.00992	6.95881	6.94333	6.97361	6.99348	7.06394	7.11422	7.11728	7.16395	7.16266	7.19024	7.17997	7.16304	7.1806	7.19247	7.27247	7.27342	7.29579	7.27287	7.30857	7.24864	7.25141	7.15509	7.15429	7.13926	7.11716	7.11051	7.1065	7.07788	7.00677	7.0156	7.01709	7.00369	7.02999	6.99695	6.99056	6.99055	7.01278	7.00014	7.00522	6.96335	6.96147	6.98934	7.01509	6.92998	6.87243
7.68679	7.73847	7.61894	7.31712	7.10413	6.81632	6.84619	6.8882	6.91352	6.913	6.93473	7.04302	7.04276	7.07358	7.07518	7.10839	7.18456	7.2583	7.2773	7.27335	7.28302	7.30662	7.29235	7.25844	7.28152	7.32926	7.30567	7.23341	7.17172	7.21354	7.17908	7.12519	7.10063	7.06325	7.10855	7.04142	6.98998	7.03002	7.03725	6.99198	6.99369	6.97471	6.98478	6.92357	6.9104	6.90943	6.91896	6.89309	6.80327	6.79007
7.69388	7.67556	7.51007	7.40756	7.0044	6.82288	6.7925	6.81692	6.87308	6.95131	7.03725	7.0833	7.15203	7.14936	7.1535	7.23873	7.25978	7.2891	7.28414	7.2766	7.25048	7.2885	7.28591	7.30829	7.2849	7.17718	7.15896	7.16786	7.15835	7.1385	7.12769	7.10111	7.0591	7.06253	7.05221	7.01602	7.01979	7.00112	6.98514	6.97075	6.97947	6.9697	6.95312	6.95359	6.96233	6.92238	6.9347	6.89599	6.81538	6.7243
7.68982	7.65913	7.53721	7.24784	6.81224	6.72986	6.77391	6.91127	6.86419	6.89344	6.9377	7.03911	7.0312	7.06893	7.10577	7.15475	7.15916	7.17239	7.19188	7.28338	7.18172	7.19796	7.2296	7.20909	7.13471	7.11073	7.07464	7.05345	6.97258	7.01301	6.95508	6.90859	6.9324	6.9208	6.90969	6.88689	6.88978	6.90942	6.79865	6.8447	6.82267	6.80723	6.79636	6.79595	6.86334	6.853	6.87501	6.83057	6.76326	6.71304
		7.65874	7.52268	7.23914	6.91932	6.91389	6.98162	6.98155	7.05514	7.08072	7.02613	7.0057	7.17975	7.15274	7.13994	7.17444	7.22907	7.24368	7.28732	7.31174	7.25482	7.22499	7.22793	7.17732	7.13552	7.11994	7.10213	7.06743	7.02596	7.07547	7.1057	7.03133	6.9238	6.92867	6.95624	6.90203	6.8532	6.83196	6.8325	6.81582	6.79484	6.80106	6.7669	6.77584	6.76816	6.81036	6.78314	6.78632	6.71557
7.70912	7.65024	7.50494	7.28912	6.93091	6.80177	6.84519	6.84244	6.85252	6.89559	6.9324	6.98041	7.04023	7.08407	7.09788	7.16619	7.18061	7.21204	7.26502	7.29581	7.32747	7.29793	7.34654	7.34035	7.37283	7.32176	7.22505	7.23704	7.21492	7.24375	7.2389	7.18008	7.14232	7.13392	7.06865	7.07691	6.99767	6.98291	6.96776	6.9433	6.94069	6.88001	6.87532	6.88418	6.88883	6.86709	6.88042	6.87205	6.80852	6.72217
7.78622	7.76613	7.6363	7.387	6.97564	6.85765	6.93776	7.0228	7.04256	7.03031	7.08611	7.15151	7.18535	7.18114	7.13833	7.17325	7.24198	7.23604	7.25041	7.30184	7.30625	7.36774	7.36443	7.35072	7.30906	7.29902	7.23073	7.21917	7.20941	7.17181	7.13231	7.10734	7.12394	7.10657	7.11837	7.09949	7.08756	7.06114	7.06073	7.04078	7.0899	7.10311	7.11098	7.08443	7.03722	7.02189	7.00438	6.99077	6.9123	6.86641
7.65479	7.70111	7.49799	7.31032	7.11182	6.92102	6.88997	6.87931	6.96856	6.9976	7.06244	7.09505	7.11095	7.14329	7.21255	7.20839	7.25279	7.25329	7.30706	7.3118	7.32678	7.2717	7.22897	7.19237	7.20262	7.1647	7.16869	7.12439	7.04214	7.02273	6.9827	7.05836	7.08576	6.9784	6.99001	6.95447	6.95877	6.93782	6.99951	7.00435	6.9986	6.94781	7.00878	6.97157	6.99955	6.95805	6.95081	6.97216	6.86049	6.83504
7.6619	7.65242	7.53432	7.31064	6.86279	6.69307	6.691	6.66785	6.57819	6.64612	6.65632	6.73359	6.88331	6.95012	7.01048	7.04193	7.07366	7.14655	7.22683	7.3176	7.25286	7.26013	7.25341	7.28701	7.2853	7.21526	7.1837	7.12363	7.12541	7.09844	7.07789	7.05595	7.04322	7.0236	7.0289	6.9989	6.93831	6.9602	6.94998	6.96524	6.98495	6.96171	6.97237	6.93294	6.97613	6.97846	6.97173	6.95595	6.82784	6.80793
7.63992	7.70594	7.56828	7.4244	7.06601	6.92969	6.92652	6.81387	6.83534	6.84227	6.95279	7.04204	7.06039	7.09576	7.15719	7.16285	7.19758	7.23097	7.28357	7.32325	7.36475	7.34219	7.34675	7.25009	7.15519	7.07577	7.09648	7.10797	7.04042	7.02046	6.99418	7.00558	6.99924	7.03227	6.98727	7.00996	6.99555	6.97948	7.01767	7.0566	7.06556	7.07954	7.02724	7.02798	7.09291	7.09652	6.99197	6.98564	6.91393	6.8894
						6.90884	7.01528	6.83516	6.87339	6.96373	6.93233	7.11708	7.09145	7.21469	7.16234	7.17057	7.31662	7.25619	7.33211	7.32553	7.33235	7.32663	7.27949	7.19475	7.33437	7.25152	7.24079	7.16692	7.11804	7.09688	7.09317	7.10112	7.06946	7.06929	7.03457	6.96716	7.01653	6.97431	6.97986	6.98598	7.03714	7.03456	7.02383	6.9975	7.00167	6.96998	6.96287	6.8927	6.86928
7.8293	7.78074	7.74892	7.58889	7.2235	6.96607	6.93929	6.95797	6.90301	6.93701	6.9493	7.02937	7.10529	7.17062	7.14053	7.19378	7.31388	7.3533	7.33164	7.33339	7.33793	7.34881	7.33156	7.35006	7.29339	7.27157	7.30271	7.20919	7.18455	7.17653	7.16812	7.12869	7.15004	7.10084	7.10177	7.09474	7.08939	7.07206	7.05845	7.03382	7.05656	7.10851	7.07314	7.05722	7.03379	6.98557	6.94617	6.98866	6.86092	6.84976
		7.48254	7.37625	7.0646	6.94921	6.95637	6.90576	6.93076	7.01836	7.06021	7.13195	7.11322	7.10494	7.20289	7.21876	7.24842	7.31487	7.32579	7.34012	7.37617	7.36289	7.37042	7.30016	7.29109	7.28635	7.21712	7.1616	7.1001	7.08376	7.01483	6.98893	6.97693	6.96171	6.92599	6.91502	6.89393	6.93595	6.87764	6.90027	6.90566	6.85385	6.86595	6.86533	6.77247	6.84338	6.86523	6.82309	6.73512	6.75158
			7.57626	7.12104	6.97439	6.95644	6.99871	7.16043	7.17906	7.2641	7.20476	7.21812	7.28344	7.31578	7.31518	7.34847	7.40182	7.37229	7.34503	7.37323	7.34868	7.39796	7.29893	7.29148	7.19852	7.21762	7.17446	7.24871	7.19231	7.16899	7.09858	7.15261	7.19311	7.09274	7.05575	7.00326	6.87739	6.80389	6.86545	6.93839	6.90379	6.95844	7.00679	6.95475	6.9282	6.94598	6.90668	6.81865	6.82819
	7.77939	7.69303	7.58471	7.32504	6.97445	7.06028	7.03584	7.00392	7.01345	7.11422	7.06263	7.09433	7.1621	7.10751	7.15835	7.22159	7.36409	7.31733	7.39158	7.32949	7.28934	7.2393	7.19581	7.20417	7.1414	7.09586	7.12011	7.09877	7.09194	7.11129	7.07241	7.0546	7.06321	7.10906	7.03569	7.00198	7.01083	7.02472	7.09705	6.95943	7.06916	7.03651	6.99214	6.91152	6.94774	6.99293	6.93601	6.90146	6.80856
	8.01502	7.81702	7.61467	7.25924	7.09278	7.07598	7.13483	7.0709	7.25485	7.21782	7.22027	7.19445	7.23258	7.25933	7.25885	7.2311	7.3446	7.34606	7.40881	7.39436	7.39233	7.45771	7.40165	7.34884	7.33398	7.31179	7.30146	7.23836	7.1962	7.15582	7.11809	7.13035	7.11274	7.0649	7.06061	7.05365	7.07544	7.04458	7.06264	7.06216	7.00347	7.02197	7.0566	6.99011	7.01774	6.96287	6.99501	6.82405	6.82788
															7.2091	7.39314	7.37511	7.36658	7.43288	7.31954	7.32294	7.47528	7.44019	7.4638	7.41589	7.37755	7.34191	7.33345	7.27057	7.27257	7.24663	7.19847	7.16407	7.139	7.13028	7.13082	7.10395	7.10862	7.05543	7.07967	7.08678	7.06463	7.08794	7.05616	7.02604	7.03583	7.02263	6.93862	6.91852
												7.27351	7.20735	7.4149	7.31582	7.31597	7.41359	7.42061	7.46044	7.41383	7.48948	7.33218	7.28114	7.26277	7.28355	7.20334	7.17299	7.22565	7.20658	7.09579	7.09006	7.14934	7.10074	7.08313	7.02034	7.00825	6.97865	6.95451	7.0245	7.02654	6.99468	6.98247	6.9687	6.98333	6.98512	6.96247	6.9065	6.86578	6.83899
																		7.40308	7.49637	7.40854	7.44354	7.48866	7.36712	7.35482	7.33178	7.25515	7.2969	7.28768	7.24058	7.17704	7.15034	7.1081	6.98464	6.96497	6.97063	6.96806	6.91665	6.95146	6.9639	6.95329	6.94678	6.90259	6.89821	6.90023	6.89587	6.89188	6.80165	6.8422	6.77666
																						7.28942	7.24493	7.3008	7.28588	7.23022	7.26372	7.21286	7.15206	7.14064	7.08525	7.12434	7.04094	7.01534	6.95188	7.0075	6.94532	6.88136	6.89552	6.85483	6.94158	6.87343	6.88219	6.87083	6.8863	6.90562	6.89248	6.80459	6.7293
																				7.41279	7.36448	7.45299	7.48153	7.45383	7.50665	7.40324	7.34941	7.34335	7.40279	7.29793	7.19814	7.16711	7.16269	7.15868	7.12985	7.11173	7.0744	7.0728	7.06297	7.05714	7.03781	7.02886	7.01093	6.97776	6.9768	6.98826	6.9512	6.93607	6.83775
																								7.26507	7.27325	7.32925	7.20362	7.26686	7.25689	7.23458	7.23701	7.16941	7.17975	7.11345	7.11471	7.02677	7.04558	7.09902	6.99894	7.01136	6.98075	6.92202	6.87954	6.92778	6.87043	6.84768	6.85403	6.78587	6.75111
																				7.46782	7.4743	7.47898	7.41255	7.47423	7.38513	7.38542	7.30774	7.29221	7.29236	7.30876	7.21169	7.18754	7.20098	7.15004	7.12989	7.13414	7.12591	7.12765	7.08984	7.11207	7.07887	7.08173	7.10171	7.13526	7.09927	7.06209	7.06093	6.98029	7.04413
																					7.47663	7.37879	7.48633	7.46545	7.45939	7.37875	7.36591	7.33718	7.32109	7.26503	7.2408	7.15206	7.14437	7.03691	7.09468	7.05045	6.99084	7.06007	7.04875	6.99909	7.02248	7.02861	7.02824	7.0162	7.04401	6.98691	6.96068	6.83746	6.80179
																						7.38835	7.4189	7.40332	7.38835	7.2762	7.25839	7.21791	7.23367	7.2879	7.2668	7.1877	7.14319	7.15846	7.12121	7.11619	7.08052	7.10117	7.11203	7.14776	7.0898	7.06473	7.04223	7.04437	7.04316	7.03146	6.97442	6.97241	6.95902
																						7.42551	7.35221	7.34636	7.31104	7.24524	7.22125	7.18925	7.21371	7.14754	7.08784	7.19919	7.11392	7.12805	7.12083	7.05087	7.08317	7.14293	7.11302	7.08759	7.07619	7.09317	7.01785	7.0274	7.02466	6.98218	6.97582	6.89437	6.88292
[truncated: 110 more columns]

## Sheet: Figure 1D - R- cells
pH versus time (h); Each row represents a single cell; Each column represents a time point
		7.61852	7.52132	7.03902	6.43051	6.2364	6.06877	6.03929	5.99261	5.9585	5.92242	5.93992	5.9363	5.8632	5.93484	6.18537	6.18379	6.12246	6.10897
	7.57247	7.43975	7.45477	6.98775	6.54899	6.23906	6.13493	6.08073	6.02473	5.99092	5.94477	5.95918	5.97162	5.94527	5.95926	5.95987	5.98618	5.96883	5.97113
		7.5169	7.44196	7.06191	6.43106	6.13984	6.04653	5.89829	5.8749	5.84606	5.76145	5.75886	5.78225	5.71913	5.73891	5.73456	5.72373	5.79091	5.79476
	7.65589	7.51672	7.43349	7.01273	6.34335	6.18551	6.01383	5.942	5.84915	5.80108	5.83054	5.83603	5.80899	5.76396	5.8044	5.82642	5.82724	5.87623	5.85637
	7.64936	7.50677	7.33733	6.84709	6.22266	6.03505	5.95562	5.86699	5.74395	5.7511	5.76549	5.76623	5.69049	5.70426	5.74854	5.76685	5.78849	5.72785	5.79773
	7.54312	7.39663	7.2804	6.75218	6.22289	6.09292	6.00088	5.88894	5.86866	5.84265	5.84723	5.79316	5.80173	5.8482	5.84157	5.80875		5.82296	5.8517
		7.47024	7.3185	6.87709	6.36236	6.15511	5.99305	5.95003	5.96756	5.89282	5.88892	5.92233	5.90282	5.94222	5.94172	5.97238		5.98641	6.0221
		7.48184	7.30598	6.8566	6.37599	6.12921	6.02958	5.96062	5.92579	5.89614	5.88101	5.89116	5.87164	5.86666	5.87923	5.85473	5.92369	5.89869	5.93511
		7.40517	7.24296	6.93467	6.41167	6.22068	6.1126	6.01236	6.0143	5.93227	6.00505	5.99914	5.99695	5.9851	6.0144	6.00844	6.02952	6.06293	6.03952
		7.55585	7.45418	6.98734	6.33519	6.18112	6.08413	6.00131	6.00586	5.89303	5.94305	5.89388	5.90756	5.85994	5.91765	5.89844	5.89183	5.91651	5.9589
7.65896	7.60346	7.51725	7.39977	6.93778	6.34804	6.11279	6.00803	5.91072	5.84316	5.82571	5.81853	5.8349	5.79909	5.79259	5.80154	5.86874	5.84316	5.8116	5.90365
		7.72728	7.53128	7.08889	6.53997	6.48077	6.40876	6.26879	6.28654	6.22587	6.23906	6.24086	6.19156	6.15454	6.21613	6.21265	6.23037	6.23949	6.24352
		7.73624	7.52853	7.06234	6.42792	6.22368	6.08087	5.94079	5.91069	5.91451	5.88827	5.90405	5.90199	5.86629	5.8868	5.8872	5.90602	5.91131	5.90664
		7.55182	7.46122	6.95461	6.37091	6.15858	6.07193	5.97648	5.97007	5.91311	5.87007	5.88901	5.84969	5.80107	5.84098	5.84971	5.83432	5.83568	5.85307
		7.57568	7.42393	7.05579	6.45721	6.25468	6.10922	6.11334	6.08463	6.07781	6.13396	6.19204	6.23165	6.14558	6.17984	6.28501	6.34305	6.37524	6.35539
			7.47015	6.91194	6.32221	6.1726	6.24389	6.02818	6.03963	6.02032	6.00373	5.94413	5.93096	5.98758	5.98428	5.97973	6.04757	5.99699	6.01317
7.62184	7.58118	7.50802	7.41385	6.89707	6.38202	6.10464	5.98809	5.88787	5.80382	5.81353	5.76519	5.76934	5.71832	5.75104	5.74367	5.79022	5.78799	5.79004	5.80455
7.62714	7.60164	7.50961	7.20613	6.77619	6.36926	6.17951	5.99916	5.91518	5.91487	5.78284	5.82518	5.9274	5.95003	5.8807	5.87683	5.8645	5.82597	5.87228	5.74652
7.68957	7.61682	7.61382	7.48649	7.05963	6.53586	6.2579	6.10161	5.96514	5.92016	5.86775	5.8477	5.83228	5.85329	5.81479	5.80025	5.76872	5.81962	5.80578	5.82552
7.61787	7.61465	7.43941	7.41471	7.05401	6.53378	6.25536	6.07358	5.96643	5.90836	5.83008	5.82924	5.84111	5.82638	5.78117	5.78799	5.92491	5.91509	5.88915	5.8607
7.6497	7.55519	7.51362	7.37188	6.93761	6.44784	6.15058	6.0629	5.97472	5.93245	5.84755	5.86709	5.82258	5.8515	5.87169	5.82753	5.80435	5.83126	5.85389	5.88364
7.72826	7.73819	7.6171	7.56655	7.19242	6.42618	6.17826	6.08144	6.00261	6.00088	5.95843	5.96483	5.90637	5.94035	5.90893	5.91735	5.89158	5.91559	5.94219	5.95183
7.8564	7.77366	7.70744	7.66128	7.25241	6.54174	6.23896	6.15637	6.11592	6.02079	6.00735	5.97579	5.97371	5.91682	5.91602	5.89617	5.8773	5.89066	5.8769	5.89779
7.71675	7.73515	7.66437	7.57458	7.38474	6.60625	6.22363	6.10602	6.05844	5.99703	5.95992	5.95053	5.96813	5.93929	5.90295	5.95539	5.98417	5.99275	6.00444	6.04427
	7.69272	7.60073	7.50298	7.34034	6.68869	6.2215	6.12526	6.04805	5.95391	5.90623	5.88744	5.88902	6.10424	6.00035	5.93932	5.93134	5.97914	5.96693	5.97694
		7.67578	7.5382	7.31764	6.6116	6.30002	6.14168	6.03883	6.03306	6.02487	6.00183	5.95151	5.94753	5.94498	5.92212	5.91279	5.94932	5.94765	5.97804
7.6895	7.65137	7.53992	7.50491	7.40257	6.72348	6.47805	6.28778	6.1806	6.13858	6.07774	6.05331	6.03027	5.96082	6.01552	5.9757	5.97315	5.98792	6.03932	6.041
7.72465	7.64907	7.61781	7.48788	7.32067	6.5856	6.17914	6.09422	6.03594	5.98454	5.89231	5.91262	5.86835	5.86683	5.8022	5.85678	5.86655	5.86672	5.87717	5.91351
7.68999	7.68681	7.63123	7.54351	7.31014	6.61002	6.23075	6.11793	6.06359	5.97627	5.94036	5.96181	5.95235	5.87291	5.91899	5.87556	5.8982	5.91274	5.8961	5.94387
7.68516	7.69531	7.64193	7.62268	7.38685	6.76853	6.47444	6.26877	6.17591	6.10077	6.05433	6.00328	6.00778	5.94625	5.98288	5.94614	5.93649	5.96096	6.0187	5.99593
7.67859	7.60077	7.47505	7.51265	7.21671	6.52915	6.28335	6.16916	6.04966	5.97762	5.93741	5.91389	5.84819	5.8292	5.84132	5.82389	5.76909	5.85034	5.8063	5.80654
7.63339	7.61788	7.47011	7.51837	7.14951	6.46853	6.13537	6.05967	5.9272	5.86988	5.87727	5.83639	5.76661	5.76057	5.69689	5.75978	5.75834	6.07038	6.0196	5.94217
