# Supplementary material for: Monitoring single-cell dynamics of entry into quiescence during an unperturbed life cycle
Source: eLife. 2021 Nov 1;10:e73186. doi: 10.7554/eLife.73186 (PMC8594939; doi:10.7554/eLife.73186)
Supplement: Figure 2—source data 1. [file elife-73186-fig2-data1.xlsx]

## Sheet: Figure 2A - Mito. Aggregation
Mitochondria aggregation index versus time
									298.329	433.706	548.511	727.517	621.926	678.584	643.436	513.518	353.48	431.143	692.574	647.422	814.308	739.566	619.295	573.89	397.113	488.707	400.055	519.93	549.262	459.799	367.556	386.066	752.167	465.522	543.366	537.57	489.298	481.815	381.308	382.753	542.874	462.081	593.483	468.759	437.361	501.199	547.089	468.465	620.267
																																	504.489	677.143	588.518	647.849	525.883	674.117	513.892	779.248	597.263	503.017	733.157	972.326	1045.56	949.958	870.459	1142.49	1064.18
																																313.539	563.337	248.608	216.896	233.876	502.898	292.396	380.531	408.108	414.94	561.904	389.416	387.745	430.465	465.497	389.588	547.857	485.8
																															69.224
																															522.904	744.343	629.078	597.018	538.785	492.954	500.544	480.539	470.074	302.893	493.352	434.701	393.878	444.233	446.746	456.162	553.033	532.689	640.827
																													267.839	393.9	684.026	476.594	452.618	488.066	542.457	403.094	429.027	511.066	428.774	613.981	730.995	638.033	565.653	465.669	834.799	586.055	808.248	898.817	960.927
																											290.964	370.632	432.941	315.179	378.702	712.194	487	457.852	441.146	427.14	425.996	489.169	531.213	652.763	661.767	687.701	747.604	685.728	726.367	736.251	730.132	1029.53	1168.07
																										316.282	391.942	336.225	341.334	395.486	571.871	501.406	671.049	535.5	352.094	572.032	395.88	454.697	408.78	282.358	611.105	555.405	395.994	383.159	613.248	574.906	618.06	598.567	771.367
																									455.852	520.944	590.065	635.301	447.058	343.638	451.067	434.783	510.477	425.993	405.419	352.188	299.534	399.468	388.126	462.675	524.532	443.601	528.764	565.968	563.599	635.175	725.013	686.107	840.369
																									410.14	402.187	492.74	417.257	387.971	432.774	532.278	483.611	398.149	440.962
																								689.13	789.479	495.36	635.648	585.956	667.022	446.389	731.479	576.574	623.272	825.001	586.865	512.566	563.545	627.862	648.547	577.177	793.612	698.75	660.536	571.667	986.768	687.767	1267.46	1288.32	1136.55
																								352.95	423.748	378.566	673.625	356.61	402.937	400.488	533.331	576.987	514.067	554.8	579.058	620.426	466.299	482.448	579.64	688.655	778.67	1033.86	946.669	1102.71	1040.71	1158.78	1157.44	1309.27	1633.85
																						428.178	483.236	818.22	755.608	717.779	620.117	538.796	720.787	585.509	276.25	252.742	662.113	479.812	519.929	421.528	556.957	509.427	575.223	447.865	662.174	757.205	874.235	808.657	920.59	982.259	1217.03	1191.3	1247.52
																						256.71	706.703	637.51	597.215	470.571	359.893	604.772	406.383	525.84	478.15	660.883	306.859	522.491	384.649	524.347	632.768	611.666	546.008	608.671	765.336	770.397	895.452	1019.92	801.807	1003.5	1149.39	1219.74	1024.62
																	294.947	765.491	506.563	389.417	782.012	638.297	621.056	513.214	583.405	540.451	684.952	545.499	661.494	731.804	640.861	739.251	834.887	641.96	557.288	569.138	570.113	661.95	725.61	826.069	854.977	951.614	1053.7	1138.83	1142.03	1218.72	1253.38	1309.37	1456.54
																229.45	440.831	828.772	701.925	496.681	428.189	668.207	615.533	648.375	192.812	261.741	497.682	338.811	294.084	433.616	346.517	547.506	448.53	412.737	448.011	503.484	399.155	437.494	444.802	484.393	540.972	598	652.197	631.98	692.733	565.602	608.649	730.242	745.305
															327.86	658.625	569.386	434.821	803.889	904.465	492.638	519.613	611.716	550.245	489.881	785.624	704.699	880.343	571.805	651.123	662.905	372.636	876.147	501.334	567.867	602.173	575.29	507.814	565.478	659.494	883.972	837.073	901.056	891.886	1055.14	1159.27	1027.26	940.9	954.315
												275.425	347.784	798.972	604.074	374.793	435.748	356.974	556.653	506.542	494.812	851.83	537.436	555.443	723.932	530.303	560.025	626.609	341.401	586.018	766.212	389.204	639.69	705.515	361.716	521.453	508.419	666.774	740.36	586.585	721.892	830.546	976.308	708.137	796.562	815.311	1090.29	752.044	892.052
											312.189	525.395	328.509	939.422	505.84	752.01	648.436	596.288	659.719	583.759	714.433	660.987	611.262	628.769	778.832	764.074	504.12	590.821	596.549	441.762	613.264	497.883	970.058	654.427	450.12	445.033	500.324	480.176	539.185	505.422	676.846	694.632	766.941	757.226	986.459	801.733	735.516	648.259	862.532
									748.39	725.367	1056.51	558.478	623.803	874.245	892.736	687.391	731.534	647.039	452.072	696.873	547.051	652.358	387.708	726.104	499.533	788.467	470.108	757.643	565.105	377.897	615.956	373.118	518.094	495.608	588.336	534.641	554.338	694.738	600.653	636.969	649.752	685.115	1054.91	1147.69	1340.11	1346.49	1446.58	1198.72	1091.79
							560.935	483.251	758.937	413.476	563.462	637.593	499.982	476.987	632.624	608.07	452.198	564.626	499.247	713.561	484.8	580.884	446.981	552.647	600.217	570.122	539.474	610.731	489.892	642.299	280.149	321.926	521.822	368.501	350.363	450.693	384.066	326.164	451.192	409.986	554.958	510.431	685.873	566.741	692.419	822.262	898.573	1008.93	1255.17
			345.377	398.175	756.014	835.592	530.163	695.585	702.947	669.199	575.503	717.717	531.874	706.32	680.391	583.519	630.858	507.494	880.224	546.992	677.172	701.539	922.153	558.604	607.962	386.098	512.774	638.548	568.071	545.909	563.004	624.2	518.275	362.576	361.952	535.021	750.207	470.59	653.566	557.617	552.289	769.047	762.908	682.968	610.052	621.864	708.105	791.728	810.625
671.281	731.839	662.326	729.995	791.502	878.493	671.642	728.049	691.956	649.721	540.332	462.192	295.235	403.357	670.733	757.695	625.897	513.061	494.209	467.004	279.967	690.328	535.344	618.592	385.263	326.129	393.635	372.657	284.307	531.745	353.264	447.44	420.176	338.609	380.603	357.241	375.652	434.637	334.429	333.628	471.9	331.097	407.443	454.943	468.492	435.065	530.016	493.853	458.404	424.512
419.8	744.989	1106.77	541.674	522.243	600.244	642.804	582.362	555.204	443.41	453.564	569.403	773.164	465.401	407.029	500.11	447.962	468.037	240.293	401.053	641.309	521.995	556.335	702.255	597.624	354.743	463.068	458.93	505.319	525.36	451.608	497.812	465.713	404.899	406.624	381.084	463.876	462.068	466.881	516.767	576.074	754.028	757.299	891.584	984.976	1207.76	1196.61	1109.19	1349.02	1326.97
617.166	865.204	657.355	537.935	402.404	594.536	519.063	670.697	599.542	734.114	699.192	769.616	763.59	590.011	547.532	385.04	500.579	533.588	576.92	339.331	537.183	450.651	525.886	325.576	237.196	599.88	428.769	537.548	480.008	342.277	328.188	442.331	720.853	420.224	457.289	621.062	466.796	480.203	638.555	581.112	469.931	689.543	545.723	667.759	806.138	1016.68	804.552	1148.09	1216.47	1183.91
																																	395.549	381.74	374.815	317.99	331.079	424.068	575.418	495.351	509.088	504.943	332.87	495.193	764.537	590.272	418.308	438.025	489.343
																																	409.664	401.084	533.099	534.038	380.895	354.915	786.043	565.586	561.952	416.364	764.856	602.297	769.186	769.837	1002.17	800.138	689.827
																																	139.927	275.414	401.463	275.967	238.588	377.267	263.407	241.873	179.953	218.9	295.386	316.02	247.576	314.044	504.092	460.424	314.878
																																144.52	267.337	266.075	393.286
																																296.773	342.481	542.839	280.839	314.144	414.006	461.665	369.476	463.233	474.309	261.006	404.196	402.11	325.916	380.937	642.526	514.115	479.362
																																670.52	437.575	692.624	303.064	395.3	482.709	375.684	489.285	294.734	351.884	530.756	546.17	570.998	429.196	487.212	427.583	404.094	540.327
																																159.275	517.129	330.776	359.572	364.99	291.492	321.254	424.262	558.044	523.606	422.904	534.911	392.554	487.44	566.365	408.276	424.248	399.914
																															240.58	483.461	438.39	342.446	530.554	447.238	453.511	555.142	576.45	493.951	775.072	675.471	518.271	1048.73	590.683	477.681	622.525	517.666	606.116
																															284.837	554.937	464.771	419.569	362.524	309.886	418.858	357.152	398.257	446.297	400.4	537.777	449.687	484.086	523.513	507.277	385.6	491.894	469.353
																														301.041	281.834	386.106	355.359	499.719	405.492	505.712	562.809	544.321	472.359	611.06	611.131	478.958	634.997	419.759	641.138	790.333	581.377	436.374	558.644
																														556.945	432.256	750.795	643.916	476.242	448.167	625.438	537.156	511.608	607.208	664.97	478.903	541.899	754.122	648.025	677.906	643.861	613.642	653.556	804.251
																														544.355	292.7	396.543	406.047	469.867	409.206	380.233	415.218	372.782	513.699	419.144	614.86	511.96	483.753	402.576	326.393	390.467	562.428	389.538	381.337
																														522.742	416.617	450.942	630.936	406.385	404.935	473.544	552.777	538.784	555.318	715.167	540.558	405.443	498.668	612.436	562.324	417.634	503.672	402.546	736.954
																														897.232	663.365	504.544	564.896	459.219	506.633
																													203.368	251.6	274.128	274.177	442.736	367.105	529.141	496.842	478.374	495.776	631.13	423.244	491.407	658.677	538.379	477.618	430.498	530.812	434.141	415.278	552.183
																													439.573	542.74	577.4	444.69	503.797	456.372	515.261	493.623	423.651	590.744	535.42	662.488	606.632	618.902	591.856	624.343	641.763	692.153	496.015	772.026	480.46
																													339.422	684.278	752.42	830.258	660.471	657.177	538.462	657.669	352.535	554.855	638.291	596.933	587.238	626.509	801.593	546.981	495.977	876.015	721.956	482.363	682.849
																												191.716	283.143	706.632	354.752	585.589	523.152	528.006	479.336	425.605	432.936	537.082	615.789	574.115	466.242	419.411	427.868	476.178	401.416	579.531	455.635	615.978	572.995
																												599.37	480.35	553.088	836.837	748.641	814.23	198.375	330.429	315.2	350.554	438.757	364.712	305.435	344.76	504.85	405.18	453.2	338.5	400.471	287.903	356.4	288.727
																												1016.32	770.088	795.813	623.383	580.972	771.551	802.625	691.212	721.308	983.873	923.294	795.653	1128.2	936.62	771.386	795.253	768.181	712.625	949.29	1015.92	924.204	559.189
																												402.589	592.756	316.8	466.799	540.328	489.235	558.435	500.073	566.986	637.515	638.876	556.609	489.041	596.892	617.164	939.539	598.67	560.395	722.968	744.312	667	638.316
																											387.361	409.797	617.418	559.567	576.901	529.09	554.625	469.842	520.564	486.653	590.985	602.072	631.888	618.887	581.892	546.533	551.072	693.583	721.126	520.863	605.87	628.536	571.515
																											141.641	379.731	578.02	569.445	413.362	403.222	270.701	600.173	314.394	334.079	312.232	402.826	393.915	507.748	512.586	617.196	449.191	408.922	493.885	571.231	579.977	472.035	474.738
																											286.881	496.994	507.325	685.29	479.85	557.244	586.552	348.978	251.882	327.56	412.641	349.645	424.128	400.486	532.468	548.656	540.023	457.799	548.361	603.666	478.36	702.745	554.441
																											246.943	216.357	319.899	558.996	546.438	310.247	392.858	317.718	294.084	303.389	263.17	287.447	334.658	407.223	359.417	282.655	399.377	443.922	378.507	442.964	418.84	486.522	508.375
																										419.818	581.634	605.645	350.11	497.581	504.133	403.164	519.017	478.022	468.533	488.19	481.871	531.889	638.036	525.579	719.322	616.355	956.655	827.013	637.363	622.431	602.748	917.8	739.097
																										207.3	338.014	344.876	408.766	696.033	487.631	483.977	673.133	337.286	325.47	452.568	403.119	479.142	462.069	440.928	607.174	586.097	608.557	654.104	580.937	624.898	610.232	554.65	659.33
																										206.542	540.052	503.344	579.726	529.275	341.14	408.008	470.841	445.39	471.178	443.651	470.296	460.261	496.625	590.964	556.356	523.998	670.291	824.333	513.945	573.952	641.798	435.579	701.783
																										714.548	837.017	716.506	688.094	823.917	682.786	466.244	666.524	435.566	503.274	462.715	562.145	710.2	431.808	576.203	561.719	558.768	511.194	706.361	473.086	469.159	411.279	459.103	420.432
																								275.156	578.469	395.489	323.44	314.575	376.551	477.606	501.69	436.055	474.538	365.228	366.387	455.517	465.294	402.336	380.399	560.607	660.129	514.661	492.799	507.351	442.996	608.944	611.408	564.267	711.861
																								762.468	793.956	237.085	223.942	753.071
																							84.5586	387.67	326.132	463.122	437.266	454.972	438.835	351.084	376.638	312.041	447.314	425.169	363.954	382.776	413.444	430.467	470.08	479.375	422.139	397.619	467.465	505.901	550.693	502.069	479.251	401.648	435.56
																							334.054	460.08	638.086	539.078	309.189	387.732	523.891	482.512	446.389	541.282	589.77	427.311	514.809	433.716	670.754	294.26	490.646	471.228	542.683	486.04	500.632	571.194	454.08	442.967	525.886	540.41	525.614
																							320.84	246.527	314.974	504.167	444.972	445.583	249.005	454.758	536.985	702.016	419.154	432.771	328.817	529.777	592.097	428.937	426.431	509.132	611.655	448.863	647.82	456.133	520.342	551.122	537.186	595.254	591.019
																							383.221	351.663	304.154	555.278	413.519	548.328	689.005	582.424	568.717	472.641	513.091	652.057	585.213	663.592	377.74	465.7	400.049	457.671	647.066	482.666	504.012	547.797	443.588	546.982	570.43	487.205	481.13
																						605.228	705.149	691.747	510.468	528.761	671.525	515.091	641.598	584.154	758.021	723.796	668.909	770.287	679.505	451.405	697.804	593.215	468.812	519.328	543.559	830.229	670.597	779.89	982.747	861.357	814.196	698.12	776.748
																						659.784	536.493	658.116	571.425	437.16	766.101	461.164	572.047	673.61	584.252	793.506	646.189	668.882	767.607	545.739	855.355	789.489	630.016	593.899	522.214	490.961	635.251	569.094	612.525	676.595	565.227	633.084	447.297
																					376.282	620.647	581.189	428.867	483.459	531.911	473.64	752.034	698.532	676.047	625.249	464.723	479.787	576.988	463.585	459.014	372.544	567.874	540.347	514.231	558.167	604.571	714.96	510.273	626.933	507.333	570.635	449.065	513.518
																					540.3	339.215	1114.56	819.892	739.825	737.152	714.564	645.769	613.057	402.678	521.851	715.958	462.214	451.379	471.982	401.446	551.34	561.597	531.24	560.215	471.401	501.888	320.497	538.353	458.034	631.827	636.693	588.101	625.617
																					299.557	269.9	381.678	505.528	542.037	543.812	646.573	612.779	526.275	500.257	571.426	364.496	404.356	465.081	482.261	471.231	429.893	416.445	550.758	542.807	507.95	479.343	555.821	678.407	495.462	764.483	580.141	582.915	536.891
																			215.42	318.831	397.455	387.171	406.952	307.833	345.42	426.947	377.115	397.373	532.113	493.409	435.626	463.432	527.543	638.806	746.505	508.143	490.466	423.949	534.865	519.152	618.256	542.59	592.229	520.119	481.488	576.036	651.461	497.572	510.532
																			471.541	720.751	654.019	578.819	920.033	891.178	682.917	900.392	756.802	53.8121	129.481	304.666	528.327	586.614	513.342	377.285	632.206	344.059	399.484	474.499	585.032	535.051	540.703	645.17	645.626	598.951	704.499	653.731	576.635	685.858	792.437
																		270.552	503.017	287.352	496.808	486.792	611.818	531.425	548.361	421.069	502.154	637.56	829.666	593.585	676.78	420.285	669.227	580.356	456.429	409.257	505.626	433.99	372.444	551.312	506.401	620.27	474.882	574.622	670.544	588.483	777.405	714.672	611.28
																		202.392	364.677	451.312	460.995	479.026	517.254	373.004	403.927	722.783	357	492.174	579.119	500.1	480.696	483.146	495.631	391.777	533.86	470.187	495.339	518.644	461.06	593.671	468.988	433.927	761.161	777.69	459.086	527.235	590.809	399.895	626.367
																	153.438	456.817	766.879	748.355	628.225	484.421	541.639	134.256	425.236	464.823	292.855	326.496	638.297	495.828	566.899	404.796	427.328	384.363	372.295	434.374	392.753	390.668	492.577	598.225	458.595	632.488	575.467	591.329	636.292	642.079	604.732	774.459	898.217
																	254.388	425.954	557.769	640.83	660.129	512.723	512.706	527.485	374.486	500.594	476.448	403.351	490.713	634.872	461.094	373.77	537.578	460.2	349.669	531.678	440.335	478.124	439.087	512.433	357.41	431.75	734.548	582.896	510.297	572.936	578.216	585.943	576.323
																540.032	748.809	725.154	632.48	612.793	473.464	736.653	601.884	615.515	427.475	587.751	593.645	616.957	429.353	420.474	536.229	395.769	182.816	268.274	427.097	382.433	367.917	357.183	493.201	421.416	491.627	515.59	464.829	397.995	385.745	487.384	444.004	595.478	494.389
															304.392	539.283	424.062	282.705	396.566	645.145	427.671	519.433	394.42	692.705	467.46	691.888	483.621	475.54	648.241	472.106	412.565	345.27	559.885	514.586	384.521	298.377	388.517	362.922	488.897	478.461	381.574	405	639.449	540.733	663.409	575.92	465.868	637.13	454.405
															408.723	389.695	618.829	440.935	452.418	466.576	464.669	357.772	599.387	572.115	462.858	583.996	852.523	493.046	412.169	575.854	780.51	813.297	710.098	612.352	491.109	513.266	494.845	473.877	641.54	473.151	443.627	467	698.149	549.561	687.763	597.968	640.42	604.201	592.909
															212.481	543.674	526.257	710.696	898.733	788.954	728.794	877.248	742.404	776.409	744.478	773.686	802.413	1136.21	1204.28	839.162	760.474	850.652	798.567	665.698	766.604	444.668	659.211	414.952	751.321	611.88	584.948	583.528	533.371	445.208	411.691	580.311	546.918	745.813	725.829
															430.623	779.151	600.841	466.371	605.781	597.478	529.34	806.929	728.349	762.312	625.883	654.964	601.206	542.194	494.059	698.808	531.62	462.649	519.61	650.913	603.56	617.707	479.716	613.479	524.202	540.966	565.028	641.617	657.849	689.985	674.523	549.566	411.518	614.111	582.218
														680.755	824.752	552.29	591.481	505.811	483.328	665.982	632.936	456.549	718.096	626.82	472.624	605.741	378.958	620.21	692.509	511.3	533.311	483.037	463.168	579.196	437.492	553.367	443.696	552.053	552.177	627.828	615.375	518.701	551.474	514.163	468.214	524.506	541.798	694.856	649.339
													140.467	232.154	649.366	550.977	429.575	591.886	418.99	569.872	604.255	462.745	547.012	666.653	751.843	521.278	554.479	390.412	524.558	528.888	820.424	612.528	778.186	594.575	679.253	432.216	529.57	705.714	626.578	502.204	552.439	648.611	782.7	774.506	774.087	600.455	780.1	781.926	825.632
													316.895	753.459	542.556	606.633	667.785	365.435	477.21	502.731	555.081	519.812	444.171	401.872	376.966	426.615	451.386	474.39	519.991	610.609	637.485	530.458	503.393	445.52	393.427	429.108	305	502.717	416.504	386.184	426.61	337.056	336.244	352.517	475.433	406.367	764.4	460.296	451.589
												765.89	963.746	636.333	611.942	871.456	592.748	578.336	965.101	592.482	462.176	631.749	440.161	416.112	725.294	581.5	535.538	630.957	660.96	648.434	423.032	759.05	380.519	556.807	315.539	307.102	403.088	346.848	526.844	614.417	427.889	453.14	585.97	589.313	466.418	417.358	523.594	493.941	481.859
										110.196	72.4175	110.111	248.969	340.224	757.608	499.353	690.931	459.828	714.777	506.127	565.498	513.911	500.515	601.473	520.047	762.925	571.578	589.709	669.77	619.152	995.014	673.944	772.682	585.957	429.098	379.672	583.182	532.093	539.715	464.2	638.584	674.495	600.519	416.336	769.26	530.584	666.286	588.226	641.394
								103.344	592.9	583.337	353.058	561.293	277.587	384.94	281.556	554.597	715.067	375.557	452.463	673.521	592.027	412.305	576.582	380.664	262.619	343.337	426.064	470.157	517.083	447.016	320.189	386.367	404.831	275.902	399.703	752.655	345.559	303.817	377.387	548.853	396.957	547.86	416.218	461.287	478.652	526.548	444.911	388.633	407.987
						620.383	699.018	558.729	772.133	591.473	717.595	645.649	756.582	1132.32	681.077	861.111	845.468	810.007	900.792	576.515	603.244	402.827	488.456	394.06	521.492	476.823	506.176	372.968	298.427	271.307	301.193	168.476	588.28	342.941	270.238	422.67	355.996	500.515	522.476	409.852	345.792	530.25	498.698	473.502	485.255	495.198	491.016	545.187	566.144
						229.365	278.628	667.463	810.997	605.511	649.576	440.659	562.135	484.973	536.062	555.582	455.764	552.777	407.876	580.118	261.05	470.998	372.603	351.714	335.251	577.707	325.638	365.715	354.883	368.167	213.334	272.581	265.277	291.504	411.452	394.448	360.912	259.315	409.237	359.145	446.705	399.992	332.378	402.86	406.305	519.698	413.249	517.383	515.819
						78.0723	90.2228	109.904	1418.83	979.953	799.198	713.684	1105.94	744.621	1143.05	1112.74	997.926	906.255	737.466	819.124	935.117	711.107	670.608	506.429	476.512	553.318	665.645	692.69	554.22	393.547	471.64	364.675	347.268	506.653	435.988	419.478	537.959	528.087	455.797	596.773	657.7	702.543	482.498	797.644	626.873	556.671	585.476	645.069	423.113
				303.6	323.96	377.202	782.408	972.951	591.497	597.359	694.309	884.537	667.227	570.465	603.405	444.573	455.383	679.611	415.138	547.5	509.777	619.322	641.489	493.712	565.683	551.19	483.363	435.399	548.395	479.863	690.801	545.068	499.312	578.945	528.956	372.613	656.563	462.391	659	660.273	563.927	552.268	641.743	573.509	586.287	427.385	688.797	647.418	611.685
			316.2	469.37	541.72	772.381	364.08	409.073	531.031	508.386	392.763	476.918	497.987	432.767	522.242	459.479	413.423	424.317	635.184	576.49	412.739	565.579	577.944	419.844	477.632	343.095	586.672	630.453	384.306	337.531	332.023	437.149	509.076	521.498	498.489	395.776	443.523	434.837	535.849	377.314	413.659	425.971	495.966	504.634	473.128	490.82	558.793	499.876	362.411
		975.817	654.314	779.624	1069.08	1206.1	968.882	887.721	569.952	471.825	646.332	518.657	463.351	397.2	606.292	482.291	546.055	590.037	566.182	505.027	441.309	449.523	537.124	497.81	431.543	516.509	687.202	681.333	785.373	557.948	613.894	496.329	342.872	286.043	344.183	540.83	471.085	397.338	469.645	445.953	524.99	566.554	475.103	453.64	443.639	455.254	478.044	544.043	435.481
	233.61	394.775	631.531	579.446	327.932	411.387	920.57	718.23	293.254	740.602	664.055	552.803	659.165	432.358	420.207	499.507	414.577	468.247	600.933	478.496	552.204	563.373	305.067	573.56	406.45	364.298	713.35	645.527	627.454	535.579	645.767	334.675	349.324	428.332	364.011	372.889	645.532	358.102	479.465	536.396	619.571	472.158	527.196	516.487	517.297	483.423	470.637	422.401	551
769.164	731	783.4	809.667	731.822	523.818	631.937	1035.36	852.106	762.872	652.124	555.216	667.307	826.615	664.009	620.133	631.269	918.415	620.344	685.275	718.74	483.181	756.408	599.407	512.376	463.004	486.969	496.889	616.646	390.189	528.286	611.264	398.307	447.138	350.418	662.995	373.411	353.307	455.407	475.434	448.411	532.43	426.938	548.182	404.57	492.259	398.971	485.367	422.657	437.889
841.167	584.034	446.542	671.076	398.678	389.397	570.216	625.143	305.64	513.105	482.775	706.257	467.204	595.447	508.768	520.106	441.027	514.323	300.376	438.385	486.274	416.175	397.458	409.094	322.296	308.067	656.982	485.601	516.871	341.932	358.214	387.702	531.857	443.812	408.866	317.851	423.817	406.073	399.201	398.662	427.604	347.224	481.92	520.306	545.522	479.852	483.99	537.619	518.07	473.151
479.123	733.887	945.394	796.616	918.797	857.174	706.466	644.934	610.562	477.803	766.847	984.602	948.603	715.591	720.06	946.79	641.567	744.2	552.735	817.528	686.272	881.53	871.348	900.503	913.331	702.523	912.174	495.332	484.305	568.816	527.293	584.702	497.717	437.688	382.935	440.251	315.139	441.723	398.72	451.15	658.32	660.346	557	466.618	610.133	461.778	743.503	609.758	511.76	602.333
474.292	486.102	632.986	466.011	431.799	588.534	535.086	402.434	481.977	529.81	435.362	366.391	414.221	284.186	498.108	542.693	415.646	417.114	434.692	444.03	483.729	482.513	452.58	442.843	441.233	385.752	261.362	465.811	353.5	444.191	392.894	357.935	401.542	393.62	303.066	245.073	403.499	466.785	389.652	490.613	504.477	644.071	482.372	445.507	544.018	501.588	578.089	581.301	440.274	518.642
852.567	781.873	550.612	848.45	921.951	941.519	1182.46	875.355	1318.5	834.028	1331.95	858.291	691.256	684.9	845.707	610.539	553.191	571.003	771.93	728.4	712.059	779.404	572.705	685.313	710.398	481.968	743.81	562.479	510.35	613.767	512.953	555.83	481.902	565.668	567.858	460.446	407.152	497.091	497.225	466.753	664.446	473.553	632.526	440.544	478.348	576.245	477.328	922.885	666.084	567.892
654.476	603.837	502.781	507.254	711.711	639.147	614.476	520.778	553.299	554.716	475.886	624.563	556.509	582.053	640.773	413.096	429.262	571.334	439.67	547.922	378.908	638.654	481.099	447.977	423.283	319.85	512.17	397.854	227.191	345.144	495.241	436.869	446.77	391.297	438.398	470.008	326.86	483.997	447.397	443.974	506.686	326.308	537.358	476.638	379.427	549.115	538.321	486.562	476.868	477.854
456.596	433.612	497.592	530.395	541.113	582.966	649.16	494.213	551.148	637.422	610.41	346.68	438.442	439.012	739.612	519.938	581.575	519.243	424.327	463.599	444.966	547.516	471.556	438.633	523.016	468.67	607.305	462.896	567.966	511.213	628.501	445.723	348.059	392.855	410.062	346.434	336.282	427.224	600.765	624.827	653.105	626.2	574.726	648.154	825.336	638.178	637.35	681.07	602.446	488.972
317.473	455.935	443.828	720.246	924.772	618.445	766.922	663.903	573.467	641.941	373.685	405.317	394.148	366.819	448.256	384.222	343.714	454.732	481.182	459.294	376.454	379.61	489.441	514.375	436.296	565.518	458.121	395.996	491.113	278.449	360.612	215.413	257.765	402.396	389.16	359.208	391.448	404.871	405.306	403.836	408.884	633.016	436.314	492.616	627.731	587.907	610.276	620.312	498.727	415.707
559.325	780.979	713.343	919.136	869.502	750.283	498.89	611.719	594.779	631.1	788.58	902.202	743.452	673.514	513.575	503.78	569.113	545.537	557.78	533.926	499.882	703.159	467.04	525.622	594.794	540.393	566.54	585.251	559.547	523.804	467.03	541.91	316.667	440.749	494.102	355.701	429.636	368.386	387.067	600.444	485.64	465.962	417.812	545.244	562.633	514.836	442.263	385.167	498.169	446.244
517.938	717.756	445.187	534.476	646.603	517.607	641.851	651.381	728.697	682.241	673.221	560.969	496.329	489.728	540.173	540.386	533.209	572.573	394.873	414.48	612.503	507.511	498.509	421.25	391.389	511.904	593.309	441.368	370.899	435.849	408.621	352.461	396.427	338.324	257.403	391.784	342.85	552.544	325.898	342.664	298.239	260.122	306.857	420.404	317.527	403.235	482.152	451.916	487.252	456.855
529.776	695.781	870.738	568.735	606.081	668.577	697.432	652.753	674.726	698.647	598.787	621.185	602.029	499.439	695.659	609.002	582.499	545.739	583.738	591.259	599.335	592.891	601.034	580.685	564.484	543.223	524.006	521.605	541.477	496.76	480.841	524.611	509.371	549.786	475.161	429.962	441.035	456.105	476.054	495.627	519.345	611.527	646.966	687.122	710.492	793.422	787.888	844.997	900.067	922.717
543.85	550.741	568.162	604.383	619.057	581.674	586.577	593.711	581.299	609.825	584.446	567.064	558.02	541.181	563.157	546.135	551.538	543.545	492.829	553.323	555.057	537.298	530.822	531.056	510.507	485.767	523.787	490.95	502.146	509.354	519.751	501.607	473.139	488.809	449.141	441.644	429.686	457.632	449.776	491.517	505.7	512	505.577	534.69	545.839	532.976	547.79	557.628	550.633	541.631
[truncated: 57 more columns]

## Sheet: Figure 2A - Time (h)
Mitochondria aggregation index versus time
0	0.166667	0.333333	0.5	0.666667	0.833333	1	1.16667	1.33333	1.5	1.66667	1.83333	2	2.16667	2.33333	2.5	2.66667	2.83333	3	3.16667	3.33333	3.5	3.66667	3.83333	4	4.16667	4.33333	4.5	4.66667	4.83333	5	5.16667	5.33333	5.5	5.66667	5.83333	6	6.16667	6.33333	6.5	6.66667	6.83333	7	7.16667	7.33333	7.5	7.66667	7.83333	8	8.16667
[truncated: 57 more columns]

## Sheet: Figure 2D - Cell growth
Cell growth versus time
0.711612	0.720168	0.816434	0.906702	0.900174	0.913794	0.93167	0.943384	0.962324	1	1.00442	1.01326	1.04116	1.06336	1.10708	1.1743	1.23756	1.27495	1.3234	1.35045	1.41585	1.44825	1.49596	1.50554	1.53802	1.5571	1.59678	1.62265	1.63502	1.65831	1.69902	1.70361	1.72256	1.73556	1.74505	1.76741	1.76832	1.78716	1.79106	1.84161	1.86372	1.85572	1.87639	1.87799	1.89504	1.88158
0.559947	0.725638	0.820966	0.86278	0.930237	0.931941	0.932565	0.940585	0.94592	1	0.98353	0.97729	0.981482	0.977906	0.9927	0.995871	0.996293	0.996668	0.998383	0.983861	0.980804	0.981654	0.981233	0.985902	0.984712	0.985075	0.98326	0.985453	0.987733	0.985768	0.983489	0.988588	1.00008	1.00303	1.00719	1.00964	1.02697	1.01428	1.01599	0.993814	0.971208	0.97208	0.978044	0.964828	0.976802	0.97891
0.572283	0.667204	0.785801	0.844331	0.851782	0.854549	0.841449	0.840946	0.958351	1	1	1	1	1	1.02457	1.02457	1.02457	1.02457	1.02457	1.02457	1.01819	1.01819	1.01819	1.01819	1.01819	1.01819	0.948374	0.948374	0.948374	0.948374	0.948374	0.948374	0.948374	0.967727	0.967727	0.967727	0.967727	0.967727	0.967727	0.967727	0.967727	0.967727	1.011	1.011	0.999152	1.00882
0.547611	0.705845	0.779654	0.857564	1.02922	1.02922	1.02922	1.02922	0.986544	1	1	1	1	1	1	1	0.984884	0.984884	0.984884	0.984884	0.984884	0.984884	0.984884	0.984884	0.984884	0.984884	0.984884	0.984884	0.984884	0.984884	0.984884	0.998074	0.998074	0.998074	0.998074		0.998074	0.998074	0.998074	0.998074	0.998074	0.998074	0.97653	0.97653	0.97653	0.97653
		0.901265	0.97911	0.993952	1.00148	0.997558	1.0057	0.966294	1	0.98742	0.985144	0.988416	0.970265	0.944712	0.953474	0.935047	0.924305	0.961183	0.919441	0.920382	0.929719	0.898285	0.950364	0.905435	0.913597	0.945811	0.920317	0.912021	0.896847	0.928908	0.919448	0.917327	0.95689	0.960525	0.955792	0.97281	0.970149	0.948526	0.941741	0.940451	0.943717	0.945334	0.927723	0.965539	0.962355
		0.79372	0.843926	0.86534	0.858724	0.856978	0.843712	0.865097	1	0.871399	0.860402	0.870751	0.877846	0.847903	0.867206	0.859594	0.876061	0.86907	0.872989	0.855017	0.885759	0.870721	0.85364	0.877988	0.884596	0.881617	0.894076	0.892111	0.884917	0.886164	0.892111	0.899134	0.916079	0.934206	0.934206	1.09556	0.992563	0.992563	1.01009	0.893168	0.89008	0.904423	0.900781	0.905984	0.896066
		0.908131	0.974479	1.00232	1.02151	1.02636	1.00266	1.01633	1	1.0148	0.965674	0.993973	0.969267	1.02054	0.997092	1.00805	0.981488	0.969267	1.00801	1.00085	0.969267	1.00719	1.01888	1.01021	0.99907	1.02151	0.984632	1.03618	1.03891	0.9828	1.02411	1.03857	0.989238	1.00905	1.02674	1.01096	1.01198	1.0177	1.0177	1.02787	1.00907	1.00205	0.998417	1.02466	1.02663
	0.858073	0.791159	0.755788	0.953284	0.953284	0.953284	1	1	1	1	1	1	1	0.97208	0.97208	0.97208		0.97208	0.97208	0.97208	0.97208	0.976425	0.976425	0.976425	0.976425	0.976425	0.976425	0.976425	0.976425	0.976425	0.976425	1.00468	1.00468	1.00468	1.00468		1.00468	1.00468	1.02508	1.02508	1.02508	1.02508	0.943553	0.943553	0.943553
	0.713144	0.829732	0.833124	0.852344	0.852478	0.860904	0.870465	0.870465	1	1	1	1	1	1	1.02709	1.02709	1.02709	1.02709	0.940364	0.940364	0.940364	0.940364	0.940364	0.940364	0.940364	0.940364	0.940364	0.940364	0.940364	0.940364	0.940364	0.940364	0.940364	0.940364	0.940364	0.940364	0.940364	0.940364	1.01589	1.01589	1.01589	1.01589	0.984612	0.984612	0.984612
	0.596212	0.726863	0.765502	0.780058	0.816767	0.814772	0.81377	0.796127	1	0.924366	0.924366	0.924366	0.924366	0.929315	0.929315	0.929315	0.929315	0.953395	0.953395	0.953395	0.953395	0.953395	0.953395	1.01274	1.01274	1.01274	0.986181	0.986181	0.986181	0.986181	0.986181	0.986181	0.989149	0.989149	0.989149	0.989149	0.989149	1.02214	1.02214	1.02214	1.0167	1.0167	1.0167	1.0167	1.0167
		0.781065	0.795479	0.942442	0.942442	0.942442	1	1	1	1	1	1	1	1	1	1.03442	1.03442	1.03442	1.03442	1.03442	1.03442	1.03442	1.03442	0.992419	0.992419	0.992419	1.01091	0.992419	0.992419	0.992419	0.992419	1.05973	1.05973	1.05973	1.05973	1.05973	1.05973	1.05973	0.919111	0.850467	0.882384	0.862844	0.868371	0.846864	0.869408
	0.388409	0.824439	0.920821	0.946435	0.937809	0.953635	0.980238	0.966282	1	0.99691	0.992537	0.973437	0.948553	0.976557	1.0423	1.09276	1.01235	1.03485	0.971375	0.905912	0.922422	1.51293	1.51067	1.49733	1.46102	1.49162	1.48501	1.50412	1.49809	1.53361	1.5107	1.53227	1.55114	1.55645	1.56069	1.57631	1.6107	1.57741	1.57465	1.99403	1.9923	2.01553	2.02274	2.15709	2.15709
	0.570315	0.958552	0.95572	0.977551	0.959875	0.989323	0.99516	1.0103	1	1.0486	1.07572	0.986307	1.07277	1.11857	1.15005	1.17544	1.14268	1.35032	1.35032	2.14123	2.16436	2.19186	2.16193	2.17971	2.20519	2.68376	2.69032	2.70544	2.72508	2.74171	2.72563	2.74283	2.73257	2.80033	2.89256	2.89256	2.89256	2.89256	3.17218	3.17218	3.34024	3.34024	3.34024	3.34024	3.38871
0.466869	0.614232	0.613386	0.600827	0.590484	0.605098	0.603142	0.614893	0.60848	1	0.976921	1.01594	1.00835	1.03515	0.993358	1.02566	1.04663	1.10576	1.10224	1.09673	1.10196	1.11588	1.30561	1.30235	1.26185	1.29613	1.30155	1.30887	1.30887	1.30887	1.38474	1.60713	1.60713	1.60713	1.60713	1.60713	1.60713	1.64754	1.64754	1.64754	1.64754	1.64754	1.79644	1.79644	1.79644	1.79644
0.824576	0.82806	0.885209	0.899534	0.957144	0.969345	0.967311	1.00014	0.986535	1	1.00427	1.01378	1.01622	1.00762	1.08438	1.23569	1.29337	1.2051	1.25238	1.25584	1.37239	1.51395	1.55971	1.54536	1.72578	1.72071	1.72362	1.72921	1.74861	1.76509	1.77702	1.79352	1.87629	1.86172	1.86917	1.8692	1.88245	1.89398	2.03833	2.04676	2.19597	2.2091	2.2136	2.20254	2.23561	2.23821
0.807631	0.850849	0.865289	0.912246	0.90531	0.92721	0.950461	0.953771	0.968373	1	1.0069	1.00632	1.01032	0.997726	0.966793	1.45624	1.52462	1.55984	1.64289	1.61175	1.14884	1.3253	1.33656	1.32553	1.33778	1.36111	1.36811	1.36717	1.40219	1.3851	1.42104	1.41455	1.40566	1.42076	1.42475	1.42382	1.44673	1.43071	1.43892	1.627	1.63211	1.62516	1.63146	1.62678	1.63439	1.77778
0.40459	0.52063	0.537819	0.915388	0.941915	0.95905	0.980103	0.975566	0.974206	1	1.00528	1.03746	1.02282	1.0129	1.07133	1.11205	1.15013	1.14711	1.14212	1.15059	1.19357	1.2109	1.22885	1.21852	1.23812	1.24469	1.40819	1.42228	1.42228	1.42228	1.42228	1.42228	1.42228	1.42228	1.47923	1.59196	1.59196	1.59196	1.62478	1.62478	1.78112	1.78112	1.78112	1.78112	1.77576	1.77576
0.487798	0.673631	0.719901	0.70393	0.713877	0.723219	0.973807	0.975522	0.994298	1	0.998815	1.03373	1.10233	1.10388	1.1444	1.19471	1.31771	1.34659	1.26962	1.29805	1.30555	1.31963	1.31136	1.45321	1.46572	1.47629	1.47164	1.4834	1.47555	1.47729	1.47816	1.48499	1.49288	1.47724	1.49453	1.49956	1.50733	1.50046	1.50854	1.44973	1.45317	1.63149	1.65773	1.62344	1.67813	1.67317
		0.682775	0.821148	0.892784	0.920122	0.897114	0.938215	0.954321	1	1.03098	1.03946	1.06487	1.13669	1.24408	1.31154	1.29477	1.31386	1.8826	1.91844	1.9757	2.00992	2.02589	2.01204	1.97201	2.04105	2.00005	2.05434	2.02797	2.04081	2.06646	1.99221	2.04421	2.04421	2.04384	2.04384	2.0528	2.54581	2.56857	2.56061	2.58149	2.57326	2.57675	2.56461	2.61875	2.63338
0.908751	0.95819	0.888958	0.901991	0.896281	0.944361	0.942855	0.956852	0.963329	1	1.00127	1.00134	1.02361	1.08499	1.04319	1.43461	1.65402	1.77114	1.67644	1.69774	1.70229	1.71584	1.71482	1.6701	1.9687	2.19901	2.21314	2.21762	2.2413	2.23726	2.27167	2.27545	2.38636	2.38973	2.42144	2.41154	2.43711	2.41639	2.40488	2.6346	2.58906	2.57418	2.5845	2.6189	2.70723	2.7159
0.574999	0.454862	0.718668	0.777588	0.776104	0.844318	0.844318	0.844318	0.926667	1	1	1	1	1	1	1.06416	1.06416	1.06416	0.967403	0.967403	0.967403	0.967403	0.967403	0.967403	0.967403	1.10971	1.10971	1.10971	1.10971	1.10971	1.10971	1.17095	1.17095	1.17095	1.17095	1.17095	1.17095	1.17095	1.17095	1.17095	1.274	1.274	1.274	1.22935	1.22935	1.28965
	0.458483	0.647164	0.685564	0.807993	0.807993	0.948648	0.948648	0.948648	1	1	1	1	1	1	1.19918	1.19918	1.19918	1.19918	1.23259	1.23259	1.23259	1.23259	1.23259	1.23259	1.23259	1.23259	1.23259	1.2877	1.2877	1.2877	1.2877	1.2877	1.2877	1.2877	1.38094	1.38094	1.38094	1.38094	1.38094	1.38094	1.42348	1.42348	1.42348	1.42348	1.48555
0.638067	0.678731	0.780188	0.956948	0.944864	0.983256	1.00312	0.993361	1.01655	1	0.998611	1.03152	1.02622	1.03754	1.06132	1.0867	1.20919	1.21104	1.19641	1.21307	1.20901	1.17835	1.18518	1.15493	1.16746	1.16237	1.18148	1.17942	1.19889	1.1883	1.22605	1.22584	1.2124	1.2362	1.23386	1.23001	1.23229	1.27114	1.25456	1.25555	1.26473	1.27426	1.27022	1.46558	1.46931	1.48104
	0.927417	0.917869	0.900472	0.912265	0.910021	0.932433	0.940864	0.985819	1	0.982453	0.982263	1.63369	1.66608	2.04406	2.08582	2.10584	2.11565	2.19975	2.17541	2.184	2.19045	2.19999	2.21047	2.35599	2.31801	2.32439	2.31878	2.35638	2.35962	2.36916	2.37682	2.3417	2.36713	2.38392	2.34765	2.38095	2.37229	2.37926	2.34548	2.37228	2.35981	2.59015	2.50154	2.44802	2.4451
0.717195	0.974407	0.997596	0.949871	0.945467	0.960417	0.979359	0.974958	0.991423	1	0.996315	1.03111	1.01788	0.986892	1.00072	1.01781	1.07417	1.35217	1.37807	1.41063	1.41608	1.33139	1.32615	1.29817	1.31822	1.35929	1.37193	1.38343	1.38065	1.40321	1.42101	1.41328	1.43619	1.42474	1.44277	1.47311	1.46896	1.4722	1.48947	1.50185	1.49909	1.48983	1.515	1.51554	1.50819	1.80808
0.758221	1.01798	0.940406	0.946552	0.938481	1.02727	1.01096	1.01548	1.03951	1	1.04222	1.02756	1.02675	1.08463	1.14789	1.18076	1.17392	1.16522	1.5593	1.57467	1.63821	1.61078	1.63747	1.62337	1.66678	1.676	1.65872	1.65923	1.67975	1.68623	1.68404	1.62956	1.69002	1.67337	1.67346	1.70788	1.68894	1.67655	1.6951	1.66398	1.65914	1.6636	1.62802	1.73933	1.71881	1.70228
0.711094	0.931334	0.951403	0.929149	0.938927	0.944987	0.960078	0.960738	0.977615	1	1.0173	1.01273	1.05385	1.00289	1.00632	1.00413	0.997011	1.1135	1.17473	1.24953	1.66093	1.87088	2.05261	2.05033	2.13156	2.16913	2.18297	2.18735	2.1987	2.30236	2.4152	2.32236	2.34673	2.52901	2.41835	2.51983	2.42021	2.47547	2.37787	2.33382	2.32759	2.34001	2.30314	2.25818	2.27415	2.26127
	0.566941	0.751565	0.757924	0.968407	0.781909	0.805464	0.800243	0.825732	1	1	1	1	1.06283	1.06283	1.06283	1.13097	1.13097	1.13097	1.13097	1.13097	1.13097	1.29116	1.29116	1.29116	1.29116	1.29116	1.29116	1.29116	1.29116	1.30736	1.30736	1.30736	1.30736	1.30736	1.30736	1.35286	1.35286	1.35286	1.36604	1.36604	1.36604	1.40402	1.40402	1.40402	1.40402
	0.713022	0.84646	0.933208	0.916902	0.97388	0.975688	0.984557	1.00576	1	1.00942	1.03176	1.02135	1.05846	1.04101	0.985623	1.44986	1.57257	1.59455	1.59775	1.6109	1.61406	1.64882	1.63749	1.62763	1.65912	1.64237	1.67489	1.67098	1.69196	1.68112	1.66843	1.72055	1.57791	1.71304	1.72203	1.57931	1.6138	1.73773	1.75363	1.55505	1.58224	1.5931	1.55749	1.51888	1.5682
0.740219	0.7714	0.744925	0.691514	0.682522	0.977464	0.990462	1.01951	1.01627	1	1.0217	1.08592	1.11584	1.23547	1.25898	1.31136	1.37194	1.35476	1.34515	1.34805	1.35122	1.35103	1.36576	1.37511	1.3663	1.37027	1.3633	1.4002	1.43725	1.43725	1.74983	1.78702	1.84403	1.86792	1.88355	1.93576	1.91788	1.95118	1.89105	1.88783	1.91122	1.90365	1.86426	1.8514	1.88348	1.90503
0.879555	0.941021	0.876151	0.897231	0.887923	0.949597	0.956565	0.981913	0.991726	1	1.00598	1.0153	1.05973	1.12137	1.37425	1.54599	1.66071	1.71591	1.67782	1.70297	1.71125	1.70268	1.71144	1.66142	1.67993	1.69196	1.71303	1.72745	1.73954	1.70896	1.71386	1.6855	1.76371	1.7578	1.73373	1.75491	1.73085	1.73637	1.72007	1.72013	1.67723	1.69459	1.73788	1.74912	1.75678	1.7384
0.404723	0.547423	0.619786	0.771356	0.749255	0.771661	0.775664	0.772469	0.797788	1	1	1	1	1	1.00219	1.05328	1.11951	1.15918	1.18146	1.18949	1.20891	1.20606	1.19904	1.30912	1.32381	1.32381	1.40382	1.41395	1.41349	1.41537	1.42685	1.52431	1.54522	1.48179	1.53394	1.52299	1.5057	1.5057	1.5057	1.79488	1.79488	1.79488	1.79488	1.80281	1.80281	1.73962
0.817806	0.798845	0.78865	0.76374	0.985936	0.985936		1.00985	1.00985	1	1	1	1.24012	1.32822	1.37392	1.42496	1.48874	1.52707	1.55272	1.57844	1.6203	1.63494	1.66384	1.67188	1.66366	1.64818	1.62861	1.66144	1.62953	1.5857	1.61823	1.59853	1.60262	1.75839	1.71077	1.86754	1.86754	1.86754	1.86754	1.86754	1.86754	1.86754	2.04724	2.04724	2.04724	2.11319
		0.639941	0.617908	0.880243	0.880243	0.880243		0.953683	1	1	1	1	1	1	1	1.1328	1.1328	1.1328	1.1328	1.1328	1.1328	1.18413	1.18413	1.18413	1.18413	1.18413	1.18413	1.18413	1.18413	1.18413	1.25748	1.25748	1.25748	1.25748	1.25748	1.25748	1.25748	1.25748	1.31507	1.31507	1.31507	1.17733	1.17733	1.26567	1.26567
	0.693582	0.850218	0.916277	0.950253	0.961949	0.980951	0.985242	0.992275	1	1.0145	1.01047	1.01243	1.02182	1.05788	1.01813	1.01832	1.25535	1.39286	1.40907	1.46772	1.43398	1.45898	1.45134	1.45436	1.44693	1.45389	1.46207	1.50704	1.77025	1.76611	1.78085	1.78454	1.65646	1.67127	1.76591	1.794	1.76894	1.76894	1.76894	1.8443	1.8443	1.8443	1.8443	1.8443	1.8443
			0.841156	0.891326	0.891326	0.933689	0.933689	1.10845	1	1	1	1.10864	1.10864	1.10864	1.10864	1.10864	1.36797	1.36797	1.54534	1.83345	1.85028	1.88231	1.88156	1.88178	1.89078	1.88814	1.91094	1.91951	1.93579	1.93554	1.93469	2.07063	2.17635	2.17635	2.17635	2.17635	2.17635	2.17635	2.17635	2.28696	2.09773	2.10513	2.12523	2.13	2.1336
			0.518265	0.967902	0.990839	0.974433	0.978522	0.991834	1	1.01041	1.00777	1.05172	1.11621	1.14868	1.11951	1.16918	1.1873	1.196	1.28648	1.30371	1.30274	1.31408	1.34959	1.47536	1.49098	1.5069	1.50931	1.48241	1.51633	1.67595	1.63363	1.6005	1.6005	1.65948	1.68566	1.68566	1.68566	1.68566	1.68566	1.48824	1.48171	1.47408	1.48702	1.48098	1.50212
	0.521757	1.16328	1.18869	1.20971	0.919183	0.907281	0.901497	0.905378	1	0.915537	0.925568	0.923014	0.945052	0.99509	1.14401	1.10945	1.11407	1.10822	1.10519	1.1078	1.10713	1.11608	1.14379	1.15302	1.14335	1.1415	1.14138	1.14651	1.20222	1.25156	1.24493	1.25562	1.24829	1.27043	1.23234	1.27606	1.27831	1.27947	1.38052	1.28923	1.29129	1.29426	1.28748	1.39845	1.39795
0.572283	0.667204	0.785801	0.844331	0.851782	0.854549	0.841449	0.840946	0.958351	1	1	1	1	1	1.02457	1.02457	1.02457	1.02457	1.02457	1.02457	1.01819	1.01819	1.01819	1.01819	1.01819	1.01819	0.948374	0.948374	0.948374	0.948374	0.948374	0.948374	0.948374	0.967727	0.967727	0.967727	0.967727	0.967727	0.967727	0.967727	0.967727	0.967727	1.011	1.011	0.999152	1.00882
0.744131	0.531123	0.712408	0.753519	0.748063	0.799012	0.819378	0.842988	0.835488	1	1	1	1	1	1.07517	1.07517	1.07517	1.07517	1.07517	1.0786	1.06002	1.09059	1.09059	1.12103	1.12103	1.12103	1.14968	1.14968	1.14968	1.15105	1.15105	1.15105	1.15105	1.2401	1.2401	1.2401	1.2401	1.2401	1.21712	1.21712		1.21712	1.21712	1.22732	1.22732	1.22732
0.96328	0.891448	0.94806	0.91698	0.938018	0.951496	0.978806	0.981158	0.991169	1	1.00545	1.02076	1.0081	1.0229	1.08493	1.1872	1.29182	1.28128	1.71575	1.93231	2.1117	2.16653	2.21342	2.22094	2.26787	2.31625	2.37951	2.4195	2.45495	2.46969	2.48937	2.49009	2.49733	2.51902	2.55346	2.5521	2.53402	2.4975	2.54346	2.51526	2.50852	2.50168	2.40382	2.43223	2.40651	2.41984
		0.912201	0.930954	0.943348	0.966932	0.940174	0.970435	0.978063	1	0.983674	1.00971	1.00338	1.0014	1.00338	1.0014	1.00338	1.0014	1.00338	1.0014	1.32084	1.44011	1.51324	1.51419	1.55908	1.54469	1.58284	1.5918	1.60612	1.60694	1.61824	1.57815	1.57292	1.5408	1.51007	1.52769	1.49072	1.50775	1.62012	1.62172	1.59472	1.59315	1.58314	1.61351	1.5999	1.59648
		0.870979	0.910507	0.960958	0.96715	0.953277	0.972507	1.01449	1	1.03292	1.00398	1.0098	1.03299	1.06924	1.11775	1.15655	1.18898	1.20945	1.19462	1.16846	1.63998	1.71146	1.71154	1.83534	1.84785	1.83587	1.86445	1.88147	1.89885	1.91323	1.8979	1.89184	1.92692	1.93738	1.99756	1.96091	1.95869	1.93633	2.06611	2.02303	2.04398	2.05767	1.98971	2.04588	2.05502
		0.6066	0.894757	0.91864	0.917222	0.931891	0.980845	1.00195	1	1.03655	1.02059	1.04915	1.0945	1.13053	1.15119	1.15903	1.16078	1.2161	1.19492	1.22622	1.2949	1.39032	1.32754	1.31721	1.30521	1.97319	2.15716	2.16509	2.19197	2.20534	2.23253	2.24053	2.38544	2.40859	2.42256	2.38972	2.39798	2.39486	2.42005	2.37234	2.43967	2.46551	2.41186	2.48963	2.48328
	0.943823	0.894812	0.866307	0.890172	0.903815	0.944475	0.95023	0.969639	1	1.00811	1.04493	1.00137	1.01594	1.35229	1.52824	1.54154	1.61427	1.65955	1.66787	1.69973	1.68474	1.71352	1.74182	1.78814	1.82868	1.90199	1.97589	1.99538	2.30033	2.44416	2.51957	2.6068	2.6307	2.68977	2.71932	2.74019	2.70601	2.71157	2.6642	2.6713	2.66758	2.73668	2.71291	2.68169	2.77105
	0.542643	0.773472	0.838847	0.851318	0.91306	0.897472	0.901859	0.912594	1	0.923778	0.973631	0.9382	0.974659	0.972926	0.994402	1.04497	1.03535	1.05064	1.03659	1.03516	1.02735	0.969188	1.2702	1.27833	1.28498	1.28916	1.28417	1.30243	1.31055	1.29912	1.30764	1.31836	1.31373	1.32934	1.32071	1.31883	1.42644	1.42915	1.6509	1.42175	1.43285	1.42958	1.40934	1.42933	1.41541
		0.766912	0.876838	0.882782	0.933465	0.952269	0.964602	0.970843	1	1.00822	1.00862	1.0381	1.0433	1.06275	1.09745	1.17594	1.21976	1.17982	1.14609	1.5984	1.70979	1.76631	1.84231	1.86106	1.88364	1.89111	1.93871	1.94517	1.97681	2.39288	2.40723	2.38856	2.42307	2.41354	2.4045	2.67932	2.64505	2.65334	2.65564	2.62397	2.66557	2.66791	2.60337	2.63727	2.61151
0.669036	0.395693	0.788253	0.898894	0.90566	0.915419	0.97827	0.972812	0.984862	1	1.02815	1.01893	1.03034	1.06663	1.07923	1.09123	1.10779	1.08114	1.08614	1.57681	1.73085	1.63135	1.68091	1.66043	1.72622	1.74018	1.811	1.9153	1.94692	1.9449	1.95477	1.91038	1.95761	1.91646	1.95215	1.96864	1.96558	2.01604	1.97163	2.09141	2.05491	2.01835	2.09714	2.12521	2.12762	2.12371
0.926692	1.03102	1.03959	1.07057	1.08181	0.971039	0.992271	0.983006	0.973753	1	1.01977	0.997818	1.01151	0.998521	0.980597	0.960979	1.20145	1.25923	1.32545	1.33499	1.36375	1.39132	1.46914	1.43773	1.44323	1.48816	1.45243	1.44158	1.43288	1.45487	1.46311	1.43027	1.39147	1.45775	1.44489	1.3951	1.37644	1.42612	1.41213	1.72893	1.7483	1.77944	1.95192	1.98906	1.93857	1.94681
0.839611	0.888936	0.86439	0.886114	0.903172	0.964056	0.959405	0.983597	0.98433	1	1.01406	1.00186	0.994673	1.01673	1.02395	1.2055	1.32802	1.41631	1.45196	1.41921	1.45612	1.45708	1.45883	1.45132	1.50291	1.49317	1.49186	1.786	1.85392	1.89581	1.92404	1.93416	1.92624	1.93574	1.87743	1.93608	1.91544	1.88542	1.85926	1.90322	1.89839	1.88338	1.91667	1.92591	1.95688	1.96574

## Sheet: Figure 2D - Time (h)
Time from diauxic shift (hours)
-3	-2	-1	0	1	2	3	4	5	6	7	8	9	10	11	12	13	14	15	16	17	18	19	20	21	22	23	24	25	26	27	28	29	30	31	32	33	34	35	36	37	38	39	40	41	42
