# Supplementary material for: Monitoring single-cell dynamics of entry into quiescence during an unperturbed life cycle
Source: eLife. 2021 Nov 1;10:e73186. doi: 10.7554/eLife.73186 (PMC8594939; doi:10.7554/eLife.73186)
Supplement: Figure 3—source data 1. [file elife-73186-fig3-data1.xlsx]

## Sheet: Scl1
Normalized Time : [0 1]: fermentation; [1 2] : DS; [2 3] : R; [3 4] : SP	Fraction of aggregated fluorescence in R- cells	Fraction of aggregated fluorescence in R+ cells
0	0	0
1	0	0
1.27778	0	0
1.55556	0.16	0
1.83333	0.36	0
2.03614	0.52	0
2.21687	0.6	0
2.39759	0.72	0
2.5	0.82	0
2.57831	0.84	0
2.99398	0.9	0.0181818
3.06887	0.92	0.109756
3.15567	0.94	0.207317
3.32928	0.94	0.369863
3.46817	0.81	0.479675
3.6765	0.47	0.637363
3.85012	0.24	0.917808
3.989	0.13	0.92

## Sheet: Gln1
Normalized Time : [0 1]: fermentation; [1 2] : DS; [2 3] : R; [3 4] : SP	Fraction of aggregated fluorescence in R- cells	Fraction of aggregated fluorescence in R+ cells
0	0	0
0.714286	0	0
1.07692	0	0.0277778
1.11538	0.676471	0.557143
1.15385	1	1
1.26923	1	1
1.76923	1	1
2.07692	1	0.927536
2.20968	1	0.769231
2.3871	1	0.652632
2.72581	1	0.493671
2.91935	1	0.511494
3	0.98	0.491228
3.03819	0.914286	0.728814
3.19097	0.625	0.96
3.36458	0.153846	1
3.45139	0	1
4	0	1

## Sheet: Dhh1
Normalized Time : [0 1]: fermentation; [1 2] : DS; [2 3] : R; [3 4] : SP	Fraction of aggregated fluorescence in R- cells	Fraction of aggregated fluorescence in R+ cells
0	0	0
0.47619	0	0
0.761905	0	0
0.857143	0	0
0.952381	0.431818	0.475
1.08571	0.842105	0.714286
1.14286	0.888889	0.897959
1.25714	0.859375	0.838983
1.31429	0.938776	0.673077
1.42857	0.982759	0.611111
1.48571	0.99	0.518519
1.82857	0.966102	0.407407
2.00506	0.96	0.461538
2.04304	0.97619	0.445783
2.27089	1	0.445783
2.33165	1	0.43
2.5	1	0.42
2.63544	0.97619	0.412698
2.81772	0.972222	0.41844
2.93924	0.774194	0.496552
3	0.4	0.65873
3.02778	0.235294	0.820896
3.08333	0.137931	0.833333
3.33333	0	0.864078
3.61111	0	0.884

## Sheet: Cdc28
Normalized Time : [0 1]: fermentation; [1 2] : DS; [2 3] : R; [3 4] : SP	Fraction of aggregated fluorescence in R- cells	Fraction of aggregated fluorescence in R+ cells
0	0	0
0.625	0	0
1.41667	0	0
1.5	0.0523256	0
1.75	0.359281	0
2.05738	0.758389	0
2.13115	0.973451	0
2.18579	0.936842	0
2.5		0
2.57377	0.959184	0
2.85069		0
2.93056	0.771429	0
3.05208		0
3.06944		0.0204082
3.10417	0.46875	0.0843373
3.13194		0.136691
3.13542		0.171717
3.14236	0.357143	0.325581
3.19097		0.697674
3.24306	0.172414	0.930233
3.52083	0	0.94

## Sheet: Abp1
Normalized Time : [0 1]: fermentation; [1 2] : DS; [2 3] : R; [3 4] : SP	Fraction of aggregated fluorescence in R- cells	Fraction of aggregated fluorescence in R+ cells
0	0	0
0.136364	0	0
0.272727	0	0
0.5	0	0
0.772727	0	0
1	0	0
1.23529	0	0
1.29412	0	0
1.32353	0.0232558	0
1.38235	0.0930233	0
1.41176	0.209302	0
1.47059	0.302326	0
1.5	0.348837	0
1.52941	0.534884	0
1.58824	0.604651	0
1.67647	0.697674	0
1.76471	0.72093	0
1.85294	0.790698	0
2.01562	0.767442	0
2.20312	0.790698	0
2.29688	0.883721	0
2.48438	0.837209	0
2.53125	0.883721	0
2.57812	0.767442	0
3	0.883721	0
3.03472	0.813953	0
3.10417	0.860465	0
3.17361	0.744186	0
3.20833	0.813953	0.0261438
3.24306	0.767442	0.0993377
3.27778	0.744186	0.350993
3.3125	0.44186	0.781457
3.41667	0.395349	0.97351
3.47222	0.372093	0.961538
3.51389	0.255814	0.955128
3.60417	0.186047	0.949367
3.71528	0.116279	0.936306
3.79861	0.0930233	0.874126
3.84028	0.116279	0.941176
3.92361	0.0465116	0.922581
4	0.0697674	0.875817
