# Supplementary material for: Monitoring single-cell dynamics of entry into quiescence during an unperturbed life cycle
Source: eLife. 2021 Nov 1;10:e73186. doi: 10.7554/eLife.73186 (PMC8594939; doi:10.7554/eLife.73186)
Supplement: Figure 3—source data 2. [file elife-73186-fig3-data2.xlsx]

## Sheet: ratio
ratio
															1.03109	1.03598	0.978389	0.911313	0.936699	0.913542	0.873002	0.918323	0.903077	0.914544	0.953601	0.998042	1.00845	1.00216	1.01247	1.00482	0.978902	1.02938	1.05761	1.10186	1.10443	1.04807	1.0553	1.08204	1.09342	1.12915	1.15343	1.15112	1.11547	1.1158	1.08963	1.07231	1.08514	1.15095	1.22143
		0.802235	0.808149	0.946787	1.1071	1.09063	1.06451	1.07791	1.05236	1.02266	1.05174	1.05156	1.06591	1.03741	1.01582	0.957655	1.02134	0.988513	0.983535	0.956966	0.936676	0.906517	0.909433	0.900239	0.874921	0.897205	0.917204	0.938746	0.976543	0.981351	1	0.987836	0.987208	1.04206	1.01882	1.07671	1.07218	1.06411	1.08226	1.06619	1.07898	1.08987	1.11125	1.12798	1.12185	1.10024	1.08563	1.14088	1.14842
	0.74316	0.773276	0.824561	1.0164	1.10275	1.06838	1.05576	1.04503	1.02809	0.999966	1.01756	1.02487	1.03097	1.05272	1.00551	1.01153	1.00702	1.01282	1.00477	1.0089	1.04	1.02816	1.02406	1.00781	1.01628	1.06096	1.05068	1.03514	1.04019	1.05931	1.09331	1.11224	1.11197	1.11593	1.1163	1.13293	1.15157	1.16174	1.16677	1.1819	1.17347	1.15907	1.17167	1.16935	1.18083	1.24204	1.18543	1.23879	1.25971
																											0.987117	1.00741	0.975256	0.968629	0.99679	0.99125	0.987313	1.00053	1.05746	1.05153	1.04538	1.06467	1.05504	1.07316	1.07282	1.07423	1.10602	1.08741	1.10622	1.09378	1.13235	1.14235	1.16976
																													0.958243	0.958603	0.952314	0.952106	0.949176	0.966742	0.972979	0.983482	0.978295	1.00235	1.01917	1.02247	0.994534	1.01791	1.00585	1.01953	1.02866	1.05059	1.07459	1.10501	1.14668
0.714459	0.702989	0.779126	0.812447	1.06802	1.21866	1.20294	1.193	1.213	1.20358	1.12434	1.06955	1.06084	1.04653	1.05165	0.999707	0.992787	0.999018	1.0052	0.991446	0.963292	0.97192	0.937918	0.929953	0.916689	0.928141	0.915156	0.916748	0.944612	0.970605	0.986445	0.998719	0.983195	0.99467	1.00012	0.996152	1.01136	1.00187	1.00844	0.971255	0.989823	0.999588	1.00599	1.02922	1.06003	1.09123	1.09105	1.11526	1.15333	1.18011
																			0.945083	0.916015	0.889354	0.89341	0.881149	0.861886	0.906249	0.918323	0.944466	0.941415	0.955406	0.963205	0.997488	0.96288	0.993195	1.00736	1.02531	1.02076	1.03633	1.03688	1.02391	1.00483	1.00758	1.01497	1.04918	1.05974	1.06649	1.08754	1.08646	1.1365	1.14931
		0.771856	0.845762	0.953588	1.10779	1.05948	1.12398	1.09641	1.08188	1.04815	1.07025	1.06178	1.06892	1.08262	1.07696	1.05307	1.05936	1.05794	1.06485	1.03133	1.04161	1.06358	1.0263	1.04586	1.02796	1.0229	1.07199	1.07831	1.07351	1.08239	1.09632	1.11763	1.08018	1.09956	1.12394	1.1001	1.1057	1.13754	1.17167	1.14444	1.13855	1.15634	1.15926	1.13984	1.13588	1.13151	1.15029	1.18542	1.20005
			0.770926	1.02068	1.1324	1.1609	1.21294	1.17079	1.19742	1.17051	1.09437	1.06836	1.0838	1.07313	1.10967	1.05361	1.03485	1.02763	1.05145	1.03233	1.06406	1.01698	1.01145	1.03028	1.04894	1.04927	1.005	1.05284	1.01972	1.04812	1.06991	1.08127	1.0969	1.08075	1.09168	1.07273	1.06452	1.11173	1.10356	1.07478	1.07346	1.03771	0.997063	1.04094	1.02099	1.0452	1.03647	1.10499	1.09721
0.751364	0.755368	0.807033	0.914767	1.17562	1.29288	1.29439	1.31128	1.37882	1.32734	1.31977	1.26387	1.16219	1.11949	1.08227	1.06337	1.04464	1.00284	0.958738	0.911208	0.944861	0.94102	0.944568	0.926955	0.927846	0.964972	0.982183	1.0158	1.01479	1.03024	1.04216	1.05505	1.0626	1.07435	1.07116	1.08932	1.12693	1.11319	1.11958	1.11005	1.09786	1.11225	1.10563	1.13032	1.1033	1.10186	1.10602	1.11585	1.19887	1.21232
																				0.863887	0.887587	0.844653	0.831255	0.844253	0.819638	0.868525	0.895114	0.898157	0.868741	0.9213	0.974274	0.991354	0.993812	0.996047	1.01226	1.02259	1.0442	1.04514	1.05091	1.05435	1.06583	1.07119	1.082	1.10229	1.10289	1.09583	1.11882	1.12834	1.19223
	0.769441	0.788181	0.862238	1.0357	1.20922	1.21115	1.22276	1.21271	1.23834	1.27086	1.31658	1.21917	1.20365	1.15796	1.10388	1.08451	1.03907	1.06344	1.02617	1.01888	1.06257	1.04956	1.02462	1.08288	1.08408	1.09118	1.09909	1.11042	1.1271	1.11708	1.11678	1.15417	1.13574	1.18163	1.18186	1.20218	1.19296	1.20909	1.21925	1.21557	1.2162	1.21574	1.24893	1.25896	1.25021	1.21435	1.23778	1.31082	1.31799
0.739705	0.752532	0.805726	0.947521	1.20939	1.26651	1.23564	1.14412	1.1747	1.15561	1.12731	1.06505	1.06978	1.04741	1.02602	0.998243	0.995779	0.98843	0.977694	0.928845	0.983275	0.974373	0.957254	0.968312	1.00952	1.02317	1.04407	1.05653	1.1055	1.08074	1.11639	1.14584	1.13066	1.13804	1.14514	1.15986	1.15798	1.14531	1.21863	1.1876	1.20235	1.21279	1.2202	1.22048	1.17526	1.18209	1.1676	1.19703	1.24303	1.2785
			0.860402	1.00114	1.16933	1.13526	1.17137	1.13372	1.12089	1.10155	1.11461	1.07654	1.08233	1.07392	1.01959	1.06493	1.05138	1.03411	1.02918	1.03773	1.01449	0.986358	1.00886	1.00198	1.04912	1.05475	1.05038	1.08583	1.12828	1.12945	1.11176	1.11577	1.12959	1.14647	1.17611	1.20784	1.15041	1.18172	1.15839	1.17701	1.17477	1.15593	1.20198	1.19744	1.20358	1.207	1.24582	1.2716	1.35643
			0.835094	0.989615	1.10266	1.09951	1.08013	1.111	1.05217	1.04019	1.05724	1.07411	1.05966	1.10352	1.08332	1.09162	1.03502	1.01578	1.0564	1.08504	1.08095	1.04747	1.0799	1.10905	1.10178	1.18986	1.14904	1.13328	1.12867	1.16317	1.1356	1.14711	1.16562	1.21455	1.245	1.22339	1.14958	1.15512	1.12969	1.12461	1.1411	1.15499	1.15546	1.1417	1.17959	1.20331	1.17586	1.16592	1.235
0.73193	0.720338	0.762436	0.855233	1.05734	1.17338	1.15188	1.08483	1.06045	1.06656	1.05258	1.01007	1.01301	1.01288	1.00748	1.00441	0.96478	0.94522	0.946362	0.939133	0.936635	0.958201	0.936478	0.940963	0.931924	0.971095	0.978386	1.00459	1.07082	1.04377	1.03203	1.04429	1.11363	1.11185	1.09964	1.10362	1.10702	1.1296	1.13579	1.12092	1.14426	1.13815	1.13195	1.14038	1.15032	1.14704	1.15834	1.16111	1.2236	1.23281
0.743409	0.728227	0.776653	0.842296	1.04063	1.1761	1.1813	1.11789	1.10193	1.0893	1.02906	1.04764	1.04465	1.0323	1.02677	1.03582	1.02602	1.00318	1.01148	1.01085	1.03838	1.04054	1.05541	1.02518	1.0353	1.03287	1.04831	1.07178	1.11434	1.10494	1.11558	1.10009	1.1197	1.10525	1.1382	1.15577	1.17535	1.16663	1.15623	1.16923	1.16799	1.15987	1.1759	1.17478	1.16411	1.16231	1.17445	1.20107	1.25158	1.26354
	0.703506	0.738376	0.784568	0.907414	1.10434	1.05249	1.06701	1.08626	1.08047	1.02117	1.05111	1.03261	0.994143	1.02501	0.996234	0.961557	0.88778	0.911343	0.874214	0.905157	0.925749	0.952066	0.975543	0.970985	1.00574	1.03173	1.01781	1.03004	1.03399	1.02285	1.04537	1.05585	1.05077	1.02413	1.06709	1.08744	1.08206	1.07367	1.03104	1.11367	1.04728	1.06661	1.09345	1.14397	1.12099	1.09297	1.12838	1.15043	1.21189
		0.7546	0.826791	0.952736	1.09113	1.10736	1.11724	1.09914	1.09843	1.08499	1.09175	1.06738	1.07055	1.05223	1.06806	1.05504	1.03027	1.03741	1.05334	0.999522	1.02716	1.01437	1.01088	0.998775	1.00413	1.0267	1.05853	1.06057	1.06163	1.07223	1.07357	1.10116	1.10233	1.10609	1.07846	1.13293	1.1308	1.13932	1.1418	1.13098	1.12152	1.16229	1.13349	1.15573	1.16383	1.19615	1.21291	1.24421	1.28267
		0.792061	0.838292	0.915736	1.0534	1.12272	1.13218	1.06812	1.08448	1.01794	1.01847	1.01198	0.989571	0.978713	0.961442	0.970971	0.96362	1.00145	1.00809	1.0074	1.00883	1.02475	0.996639	1.0335	1.07573	1.10117	1.09816	1.1079	1.12081	1.14209	1.09498	1.12067	1.17752	1.15372	1.20049	1.1747	1.15131	1.14923	1.16722	1.15043	1.17869	1.2048	1.22157	1.17392	1.17403	1.18278	1.16327	1.20036	1.26348
			0.784666	0.90758	1.07095	1.10122	1.1156	1.11592	1.14316	1.12399	1.14847	1.15154	1.12514	1.09427	1.08562	1.09195	1.08623	1.04719	1.04662	1.10231	1.09838	1.09013	1.08479	1.10375	1.13639	1.11263	1.1405	1.12451	1.14029	1.13721	1.1653	1.11573	1.14599	1.15763	1.14146	1.20957	1.21947	1.22083	1.21798	1.21036	1.2105	1.23994	1.23385	1.26323	1.25882	1.23557	1.2722	1.29247	1.30759
			0.763215	0.950088	1.10507	1.10474	1.05656	1.1076	1.09703	1.07393	1.04925	1.02412	1.03749	0.998417	0.987654	1.01143	1.01521	1.00543	1.02967	1.02542	1.0121	1.09182	1.04596	1.0711	1.08447	1.0833	1.13938	1.17411	1.10245	1.1147	1.10225	1.13357	1.17685	1.16795	1.17184	1.15876	1.1622	1.17099	1.17478	1.21534	1.19307	1.23829	1.19654	1.20486	1.1981	1.22517	1.19583	1.26106	1.33644
			0.866077	1.07004	1.25016	1.26938	1.20269	1.14798	1.16942	1.11065	1.13247	1.08771	1.05323	1.02117	0.967656	0.961773	0.961555	0.981868	1.01031	1.00839	1.0098	0.998417	1.0012	1.05388	1.06197	1.0754	1.08186	1.08504	1.09915	1.11162	1.14017	1.12342	1.12655	1.13007	1.13318	1.18177	1.15565	1.18788	1.19757	1.17249	1.16483	1.15582	1.19217	1.18329	1.17694	1.20076	1.2294	1.23183	1.26941
		0.792555	0.845561	1.08164	1.19432	1.26623	1.3051	1.3773	1.25536	1.24436	1.20931	1.19323	1.12691	1.13088	1.05839	1.04059	1.06769	1.06883	1.05441	1.08186	1.03969	1.02951	1.03673	1.06689	1.08286	1.09064	1.09347	1.10184	1.09167	1.10997	1.09877	1.07053	1.12359	1.09602	1.11855	1.0941	1.12057	1.10146	1.09467	1.11402	1.10537	1.11862	1.09059	1.07239	1.11765	1.13758	1.13134	1.1794	1.20437
	0.710794	0.775597	0.863386	0.996093	1.09896	1.04614	1.06463	1.07584	1.0073	0.984963	1.00228	1.01568	1.02408	1.02345	1.00991	1.00809	1.05365	1.02497	1.03956	1.01782	1.03257	1.02752	1.04649	1.06686	1.08441	1.06069	1.06604	1.07902	1.08265	1.07089	1.09633	1.14169	1.14936	1.15012	1.11216	1.10032	1.1193	1.13489	1.14278	1.14366	1.15903	1.14862	1.14225	1.17782	1.12487	1.14703	1.15329	1.22318	1.19654
			0.865789	1.08271	1.20283	1.22556	1.20676	1.20865	1.13137	1.06015	1.07095	0.977648	0.971591	0.968376	0.965631	0.96803	1.00004	0.969373	0.975783	0.971544	0.963516	0.993701	1.02442	1.03219	1.0944	1.14736	1.1282	1.11642	1.1523	1.12088	1.13831	1.15351	1.16171	1.15688	1.16009	1.17493	1.23585	1.27325	1.27319	1.28328	1.26406	1.22334	1.2528	1.25599	1.22725	1.26031	1.25309	1.31075	1.30125
0.752057	0.76791	0.785378	0.858109	1.04385	1.18361	1.16842	1.13128	1.07049	1.04908	1.03728	1.06297	1.05296	1.01997	1.01147	1.01938	1.03662	1.00398	0.998879	0.990949	1.00717	0.997129	1.00888	1.02083	1.03304	1.06191	1.05747	1.06679	1.08511	1.08094	1.10731	1.12025	1.14648	1.14874	1.16218	1.13498	1.16805	1.14501	1.14119	1.15483	1.13583	1.16322	1.17614	1.18196	1.18524	1.1742	1.19667	1.21793	1.25572	1.27335
			0.788291	1.01727	1.10438	1.11553	1.08943	0.995073	0.984741	0.93893	0.970666	0.963428	0.928811	0.912137	0.912444	0.895586	0.869216	0.883713	0.897312	0.883249	0.89548	0.871096	0.920786	0.924638	0.974063	0.963699	0.987281	0.947057	0.97746	0.990315	1.03016	0.999444	0.977023	1.03353	1.05517	1.08666	1.16605	1.21506	1.17387	1.12688	1.14893	1.11429	1.08451	1.11659	1.13333	1.12209	1.14707	1.20506	1.19863
	0.790936	0.778005	0.859418	1.02335	1.12586	1.13632	1.16215	1.11849	1.12171	1.06383	1.06635	1.03915	1.04527	1.0435	1.00392	1.01924	1.02676	1.03637	1.00432	0.995659	1.02827	1.03112	1.05308	1.05933	1.04722	1.0675	1.04341	1.03058	1.0386	1.03278	1.00033	1.03213	1.04441	1.09068	1.07282	1.08881	1.10636	1.18858	1.18314	1.13233	1.1027	1.12718	1.15023	1.12182	1.16753	1.16987	1.16668	1.21726	1.26424
																		0.8686	0.82437	0.865946	0.849133	0.827942	0.886276	0.892403	0.903997	0.94365	0.921835	0.926606	0.951382	0.985857	1.00071	1.02468	1.09805	1.11022	1.1067	1.1083	1.14068	1.11865	1.11089	1.11751	1.12159	1.1497	1.15253	1.15123	1.15404	1.15662	1.21659	1.18926	1.23374
		0.830783	0.881756	1.04995	1.12007	1.11558	1.14767	1.1317	1.07751	1.05254	1.01107	1.02174	1.02649	0.971681	0.96308	0.947214	0.912603	0.907034	0.899782	0.881794	0.888379	0.88464	0.920152	0.92484	0.927297	0.96397	0.99442	1.02928	1.03874	1.07964	1.09542	1.10281	1.11225	1.13473	1.14172	1.15529	1.12842	1.16588	1.15119	1.14773	1.18152	1.17354	1.17396	1.23664	1.18848	1.17402	1.20206	1.26278	1.2512
																								0.938421	0.934128	0.90528	0.971286	0.937476	0.942731	0.954588	0.953288	0.990079	0.984362	1.02161	1.02089	1.07244	1.0612	1.0299	1.08929	1.08174	1.10045	1.13726	1.16464	1.13359	1.1706	1.18561	1.18141	1.22739	1.25152
0.740962	0.719819	0.769668	0.911451	1.02696	1.20663	1.18661	1.15901	1.14268	1.14302	1.12919	1.06272	1.06288	1.04468	1.04375	1.02451	0.981715	0.941985	0.932013	0.934075	0.929028	0.916826	0.924188	0.94191	0.929811	0.905273	0.917317	0.955214	0.988798	0.965904	0.984731	1.01491	1.02897	1.05074	1.02442	1.06367	1.09477	1.07049	1.06616	1.09355	1.0925	1.10418	1.09797	1.13627	1.14468	1.1453	1.1392	1.15584	1.21548	1.2245
						1.14568	1.07937	1.19396	1.16866	1.11099	1.13071	1.01953	1.03428	0.965282	0.994011	0.989434	0.911707	0.943101	0.903832	0.907167	0.903707	0.906607	0.930868	0.976125	0.902686	0.94557	0.951273	0.99146	1.01899	1.03114	1.03328	1.02869	1.0471	1.04719	1.06776	1.10886	1.07861	1.10443	1.10099	1.09723	1.06623	1.06777	1.07421	1.09017	1.08763	1.10711	1.11153	1.15609	1.17135
0.743594	0.752586	0.777457	0.890967	1.0835	1.25966	1.23625	1.23636	1.25812	1.27493	1.25777	1.21224	1.10911	1.11522	1.02371	1.05349	1.02803	1.01154	0.989272	1.00283	1.0131	0.95558	0.981673	1.01944	1.01651	1.03409	1.06244	1.07344	1.10268	1.1146	1.11641	1.11894	1.11508	1.1258	1.13722	1.14868	1.18316	1.18657	1.16385	1.14685	1.1836	1.16111	1.15469	1.176	1.20242	1.18481	1.17682	1.19344	1.23552	1.24172
0.700818	0.708749	0.762221	0.876462	1.10361	1.17902	1.12727	1.07483	1.063	1.07031	1.03738	1.00006	0.981276	0.983593	1.00747	0.987955	0.950636	0.953802	0.946157	0.919286	0.917017	0.885967	0.887614	0.894456	0.915576	0.920742	0.956649	0.962862	0.968139	0.98875	1.01087	1.02511	1.01562	1.02556	1.0188	1.02963	1.03654	1.05199	1.05223	1.06406	1.03518	1.02754	1.02302	1.03835	1.06618	1.07538	1.08598	1.09429	1.14347	1.17324
0.70725	0.742876	0.762565	0.842903	1.06703	1.19216	1.11288	1.05797	1.02352	1.02264	0.997071	0.998358	0.987056	1.03503	1.01888	1.03467	1.03274	0.999724	1.01465	1.00006	1.02412	0.985014	0.991699	0.993889	0.982279	0.980727	1.01477	1.0362	1.03228	1.02188	1.03712	1.05482	1.04276	1.07034	1.06527	1.07433	1.01705	1.01474	0.994774	0.995141	0.983605	1.04427	1.03749	1.06867	1.08026	1.11834	1.10858	1.11541	1.17238	1.14659
	0.635581	0.967162	0.831548	1.08261	1.11406	1.12376	1.10486	1.09263	1.05034	1.02117	1.01942	0.993115	0.993832	0.978596	0.984239	0.993621	0.983891	0.97737	0.934536	0.93404	0.922407	0.934327	0.91583	0.947097	0.945628	0.998053	0.998501	1.00694	1.01949	1.02329	1.0256	1.04217	1.08452	1.07917	1.07827	1.08639	1.07051	1.09051	1.09442	1.09442	1.08088	1.08856	1.08546	1.11122	1.1124	1.09517	1.07948	1.13219	1.1693
															0.968307	0.873449	0.882316	0.886546	0.854219	0.910218	0.908483	0.834169	0.85073	0.83955	0.86239	0.881113	0.89888	0.903149	0.935534	0.934484	0.948165	0.974092	0.993045	1.00709	1.01202	1.01172	1.02706	1.02438	1.05536	1.04113	1.03699	1.04994	1.03631	1.05493	1.07288	1.06701	1.07493	1.12673	1.13949
0.684108	0.702971	0.715614	0.782736	0.960531	1.10953	1.12631	1.11458	1.14943	1.12774	1.12001	1.07088	1.02629	0.989409	1.00623	0.976655	0.913106	0.893165	0.904066	0.903184	0.900887	0.895415	0.904106	0.894788	0.92365	0.935009	0.918841	0.968262	0.981718	0.986138	0.990795	1.01293	1.00088	1.02885	1.02832	1.03237	1.03547	1.04558	1.05357	1.06821	1.05469	1.02444	1.04494	1.0543	1.06823	1.09748	1.12197	1.09558	1.17686	1.18424
	0.616509	0.688832	0.771512	0.941488	1.03351	1.04328	1.00945	1.04626	0.943805	0.963588	0.962269	0.976286	0.955657	0.941444	0.941696	0.956451	0.897526	0.896796	0.865819	0.872856	0.873848	0.842421	0.869295	0.895397	0.902885	0.914177	0.919481	0.952565	0.975331	0.997647	1.01896	1.01198	1.02202	1.04978	1.0523	1.05641	1.0436	1.0618	1.0511	1.05139	1.08653	1.07533	1.05467	1.09469	1.07788	1.11153	1.09169	1.20142	1.19884
																				0.837664	0.834629	0.832445	0.864005	0.834661	0.877381	0.877237	0.916254	0.924259	0.924183	0.915731	0.966904	0.980073	0.972722	1.00088	1.01224	1.00984	1.0145	1.01352	1.03521	1.0224	1.04159	1.03992	1.02835	1.0092	1.02976	1.05143	1.05211	1.10073	1.06206
[truncated: 113 more columns]

## Sheet: tpHini
tpHini
77
102
76
84
90
0
68
93
90
73
95
76
96
99
74
73
69
97
96
111
81
0
103
95
103
68
80
119
95
80
66
74
56
64
99
84
100
74
61
78
70
83

## Sheet: tpHend
tpHend
97
110
96
104
105
0
88
107
110
90
107
93
109
112
97
89
89
112
109
129
103
0
115
116
128
98
109
130
114
87
85
82
86
92
119
108
118
102
100
103
97
98

## Sheet: tfreeze
tfreeze
86
109
80
88
92
0
71
107
101
94
99
79
107
105
92
89
84
117
104
127
99
0
107
99
120
83
99
127
112
86
84
86
78
88
117
94
104
102
92
96
88
110

## Sheet: pH
pH
															7.07994	7.07201	7.16785	7.28685	7.24081	7.28276	7.35881	7.27401	7.30206	7.28092	7.21085	7.13452	7.11715	7.12762	7.11047	7.12318	7.16697	7.08272	7.03738	6.9687	6.96481	7.05257	7.04105	6.99913	6.9816	6.92771	6.89206	6.89542	6.94814	6.94763	6.98741	7.01425	6.99433	6.89567	6.79608
		7.50046	7.48816	7.22286	6.96076	6.98587	7.02649	7.00552	7.04572	7.09369	7.04672	7.047	7.02428	7.06969	7.10494	7.20374	7.09586	7.1506	7.15906	7.20494	7.24085	7.29569	7.29031	7.30734	7.35513	7.31299	7.27605	7.23715	7.17101	7.16278	7.13124	7.15174	7.15281	7.06221	7.1	7.00739	7.01446	7.02712	6.99877	7.02385	7.00386	6.98703	6.95449	6.92945	6.93857	6.97117	6.99357	6.9104	6.89936
	7.62863	7.56207	7.45447	7.10398	6.96735	7.02041	7.04032	7.05743	7.08482	7.1313	7.10208	7.09008	7.08013	7.04515	7.12203	7.11203	7.11952	7.10989	7.12327	7.11639	7.06553	7.08471	7.0914	7.1182	7.10418	7.03208	7.0484	7.07337	7.06522	7.03469	6.98176	6.953	6.95339	6.94744	6.94689	6.92211	6.89476	6.88004	6.8728	6.8512	6.8632	6.88389	6.86578	6.86909	6.85272	6.76805	6.84621	6.77244	6.74437
																											7.15297	7.11886	7.17322	7.18465	7.13663	7.14596	7.15263	7.13035	7.03762	7.04704	7.05688	7.02623	7.04146	7.01293	7.01347	7.01126	6.96239	6.99082	6.96209	6.98104	6.92298	6.90823	6.8685
																													7.20271	7.20208	7.21311	7.21347	7.21864	7.18791	7.17714	7.15915	7.16801	7.1273	7.09942	7.094	7.14042	7.10149	7.12147	7.09884	7.0839	7.04855	7.0107	6.96392	6.9019
7.69463	7.72174	7.54944	7.47927	7.02097	6.79989	6.82164	6.83555	6.80769	6.82074	6.93487	7.01857	7.03227	7.05503	7.04686	7.13173	7.14337	7.13288	7.12255	7.14563	7.1939	7.17896	7.23863	7.25292	7.27699	7.25619	7.2798	7.27689	7.22672	7.18123	7.15411	7.13339	7.15964	7.14019	7.13104	7.1377	7.11231	7.1281	7.11716	7.18011	7.14838	7.13193	7.12122	7.08298	7.03356	6.98495	6.98523	6.94845	6.89221	6.85375
																			7.22588	7.27823	7.32772	7.32009	7.34325	7.38029	7.29619	7.27401	7.22697	7.2324	7.20768	7.19405	7.13545	7.19462	7.14268	7.11894	7.08936	7.09681	7.07144	7.07056	7.09164	7.12316	7.11858	7.10634	7.0508	7.03402	7.02338	6.99063	6.99229	6.91684	6.89805
		7.56515	7.41193	7.21087	6.9597	7.03443	6.9354	6.97701	6.99937	7.05244	7.01747	7.03078	7.01956	6.99822	7.007	7.04459	7.03461	7.03686	7.02595	7.07954	7.06292	7.02796	7.08774	7.05611	7.08503	7.0933	7.01476	7.0049	7.01238	6.99858	6.97715	6.9449	7.002	6.9722	6.93547	6.97139	6.96288	6.91531	6.86578	6.90517	6.91382	6.88783	6.88362	6.91193	6.91775	6.92421	6.89663	6.84622	6.82566
			7.56717	7.09694	6.92289	6.88124	6.80777	6.86703	6.82935	6.86743	6.98013	7.02045	6.99639	7.01298	6.95686	7.04374	7.07384	7.08557	7.04717	7.07792	7.0272	7.10303	7.11216	7.08125	7.05117	7.05065	7.12289	7.04496	7.09851	7.05249	7.01802	7.00032	6.97626	7.00112	6.98426	7.01361	7.02647	6.95375	6.96612	7.01041	7.01247	7.06922	7.13617	7.06401	7.09644	7.05717	7.07122	6.96395	6.9758
7.61023	7.60133	7.49047	7.28051	6.86013	6.70082	6.69887	6.67714	6.59298	6.65674	6.66632	6.73885	6.87939	6.9421	6.99876	7.02828	7.05807	7.12649	7.20184	7.28704	7.22627	7.2331	7.22679	7.25833	7.25672	7.19098	7.16136	7.10497	7.10664	7.08132	7.06204	7.04144	7.0295	7.01108	7.01605	6.98789	6.93101	6.95156	6.94197	6.9563	6.9748	6.95298	6.96298	6.92598	6.96652	6.96871	6.96239	6.94757	6.82732	6.80863
																				7.3764	7.33105	7.41413	7.44092	7.41492	7.4645	7.36743	7.3169	7.31122	7.36701	7.26859	7.17491	7.14579	7.14164	7.13787	7.11081	7.0938	7.05876	7.05725	7.04803	7.04256	7.02441	7.01601	6.99919	6.96804	6.96714	6.97791	6.94312	6.92892	6.83662
	7.5704	7.53008	7.3796	7.07246	6.81291	6.81024	6.79426	6.80809	6.77304	6.72961	6.67039	6.79919	6.82065	6.88549	6.96564	6.9953	7.06701	7.02818	7.08795	7.09989	7.02955	7.05018	7.09049	6.99782	6.99597	6.98502	6.97293	6.95574	6.93075	6.94572	6.94617	6.89099	6.91796	6.85159	6.85127	6.82269	6.83561	6.8131	6.79907	6.80413	6.80327	6.8039	6.75877	6.74537	6.75705	6.80582	6.77381	6.67773	6.66859
7.63644	7.60763	7.49319	7.22156	6.81268	6.73535	6.7767	6.90564	6.86145	6.88889	6.93045	7.02564	7.01821	7.05362	7.0882	7.13418	7.13832	7.15074	7.16904	7.25492	7.1595	7.17474	7.20444	7.18519	7.11537	7.09286	7.05898	7.03909	6.96318	7.00113	6.94675	6.90312	6.92547	6.91458	6.90415	6.88275	6.88546	6.9039	6.79992	6.84315	6.82247	6.80798	6.79777	6.79738	6.86065	6.85094	6.8716	6.82988	6.7667	6.71956
			7.38317	7.12932	6.86913	6.91867	6.8662	6.92094	6.94001	6.96917	6.94943	7.00765	6.99867	7.01175	7.09872	7.02582	7.04728	7.07504	7.08305	7.06917	7.10713	7.15425	7.11646	7.12793	7.05089	7.04193	7.04888	6.99325	6.929	6.92727	6.95372	6.94769	6.92706	6.90221	6.85943	6.81482	6.89645	6.85146	6.88487	6.85816	6.86134	6.88843	6.82298	6.82932	6.82075	6.81599	6.76295	6.72862	6.62041
			7.4332	7.14873	6.96748	6.97228	7.00208	6.95486	7.04602	7.06522	7.03797	7.01144	7.03414	6.96618	6.99713	6.98435	7.07356	7.10501	7.03931	6.99448	7.00081	7.05352	7.00243	6.9578	6.96882	6.83996	6.89846	6.9216	6.92842	6.87798	6.91817	6.90127	6.87445	6.80555	6.76405	6.79339	6.89766	6.8896	6.92691	6.93446	6.91007	6.88979	6.88911	6.90919	6.85448	6.82112	6.8598	6.87402	6.77757
7.65414	7.68089	7.58572	7.39327	7.03781	6.86332	6.89431	6.99481	7.03288	7.02327	7.04538	7.11444	7.10958	7.10979	7.11875	7.12386	7.19132	7.22564	7.22361	7.23646	7.24093	7.20278	7.24121	7.2332	7.24937	7.18038	7.16785	7.12357	7.01658	7.05945	7.0784	7.05862	6.9509	6.95358	6.97208	6.96602	6.96088	6.92705	6.91789	6.93997	6.90544	6.91441	6.92356	6.91112	6.89659	6.90137	6.88495	6.88095	6.7931	6.78053
7.62807	7.66264	7.55477	7.41881	7.0645	6.85945	6.85205	6.9445	6.96859	6.98791	7.08323	7.05326	7.05804	7.07798	7.08697	7.07227	7.08819	7.12592	7.11211	7.11315	7.06814	7.06464	7.04087	7.08956	7.0731	7.07704	7.05219	7.01508	6.94983	6.96402	6.94797	6.97139	6.94179	6.96356	6.91433	6.88867	6.86052	6.873	6.88801	6.86926	6.87105	6.88274	6.85974	6.86132	6.87662	6.87922	6.8618	6.82424	6.75522	6.73929
	7.72051	7.63945	7.53778	7.29403	6.96494	7.04551	7.02256	6.9926	7.00155	7.09614	7.04771	7.07747	7.14108	7.08984	7.13756	7.19692	7.33069	7.28679	7.35649	7.29821	7.26051	7.21354	7.17273	7.18058	7.12165	7.0789	7.10166	7.08164	7.07523	7.09339	7.05689	7.04017	7.04825	7.09129	7.02243	6.99078	6.99909	7.01212	7.08002	6.95084	7.05384	7.02319	6.98154	6.90587	6.93987	6.98229	6.92886	6.89642	6.80922
		7.60303	7.44994	7.21237	6.98511	6.96036	6.94548	6.97285	6.97393	6.99456	6.98415	7.02198	7.01701	7.04592	7.02091	7.04145	7.08127	7.0697	7.04416	7.13204	7.08633	7.10733	7.1131	7.13329	7.12434	7.08709	7.03593	7.0327	7.03104	7.01438	7.01229	6.96976	6.96799	6.96229	7.00467	6.9221	6.92527	6.91268	6.90904	6.925	6.93907	6.87925	6.92128	6.88873	6.87702	6.83112	6.80781	6.76511	6.7141
		7.52185	7.4268	7.27874	7.04407	6.93729	6.92321	7.02082	6.99535	7.10144	7.10058	7.11128	7.1488	7.16729	7.19712	7.1806	7.19333	7.12881	7.11774	7.11889	7.11651	7.09027	7.13688	7.07602	7.00892	6.96975	6.97435	6.95955	6.94013	6.90862	6.97919	6.94033	6.85742	6.89164	6.82505	6.86144	6.89515	6.89818	6.87215	6.89642	6.85576	6.81905	6.79589	6.86256	6.8624	6.84996	6.87783	6.82523	6.73937
			7.53757	7.29373	7.01638	6.96968	6.94793	6.94745	6.90704	6.93538	6.89928	6.89481	6.93368	6.98029	6.99358	6.98384	6.99264	7.05398	7.05489	6.96802	6.974	6.98664	6.99486	6.96584	6.917	6.9524	6.91095	6.9346	6.91127	6.91579	6.87491	6.94775	6.90291	6.88597	6.90954	6.81243	6.79877	6.79691	6.80082	6.81134	6.81114	6.77088	6.77913	6.7397	6.74556	6.77679	6.72784	6.70136	6.68187
			7.58401	7.21703	6.96384	6.96433	7.03905	6.96001	6.97607	7.01172	7.05068	7.0913	7.06957	7.13389	7.15205	7.11219	7.10594	7.12217	7.08224	7.08917	7.11108	6.98405	7.05594	7.01614	6.99537	6.99717	6.9126	6.86228	6.96781	6.94929	6.96812	6.92117	6.85838	6.8711	6.86553	6.88433	6.87936	6.86675	6.86134	6.80446	6.83544	6.77311	6.83058	6.81896	6.82839	6.79096	6.83157	6.74258	6.64529
			7.37216	7.01781	6.75712	6.73156	6.82199	6.9	6.86899	6.95539	6.92279	6.99037	7.04433	7.09613	7.18633	7.19655	7.19693	7.1619	7.11405	7.11723	7.1149	7.13389	7.12923	7.04331	7.0305	7.00943	6.9994	6.99448	6.97284	6.95393	6.91143	6.93624	6.93157	6.92634	6.92175	6.85139	6.88885	6.84275	6.82914	6.8646	6.87558	6.88859	6.8367	6.84924	6.85825	6.82468	6.78518	6.78187	6.73152
		7.5208	7.41233	6.99974	6.83369	6.73572	6.68506	6.59483	6.75017	6.76491	6.81279	6.83522	6.93104	6.92514	7.03616	7.06456	7.0215	7.0197	7.04247	6.9994	7.06602	7.08251	7.0708	7.02275	6.99785	6.98585	6.98151	6.96874	6.98428	6.95641	6.97341	7.01704	6.93599	6.97761	6.94352	6.98054	6.94049	6.96931	6.97968	6.95031	6.96338	6.94341	6.98593	7.01413	6.94487	6.91524	6.92447	6.85475	6.81965
	7.70324	7.55705	7.37737	7.1378	6.97311	7.05566	7.02629	7.00875	7.11905	7.15663	7.12742	7.10517	7.09137	7.0924	7.11472	7.11774	7.04368	7.08992	7.06623	7.10164	7.07753	7.08575	7.0551	7.0228	6.99545	7.03251	7.02408	7.00381	6.99817	7.01648	6.97714	6.9092	6.89799	6.89688	6.95311	6.97105	6.94239	6.91921	6.90761	6.90631	6.88395	6.89907	6.90838	6.85701	6.93408	6.90139	6.89227	6.79368	6.83058
			7.37272	6.99808	6.8218	6.79042	6.81633	6.8137	6.92441	7.03337	7.01638	7.16912	7.17953	7.18508	7.18984	7.18568	7.13117	7.18336	7.17231	7.17961	7.19351	7.14183	7.09081	7.07815	6.98009	6.90091	6.92912	6.9467	6.8937	6.94002	6.91417	6.89194	6.88008	6.88706	6.88242	6.86111	6.77641	6.72646	6.72654	6.71331	6.73859	6.79346	6.75359	6.74932	6.78812	6.74357	6.7532	6.67783	6.69001
7.60869	7.57374	7.53605	7.38765	7.05932	6.84878	6.87042	6.92455	7.01711	7.05095	7.06991	7.02891	7.04477	7.0981	7.11212	7.09907	7.07098	7.12458	7.13312	7.14647	7.11926	7.13606	7.11642	7.09669	7.07677	7.03059	7.03761	7.0229	6.99437	7.00083	6.96044	6.94096	6.90219	6.89889	6.8794	6.91908	6.87095	6.90433	6.90994	6.89002	6.91782	6.87791	6.8594	6.85112	6.84648	6.86215	6.83039	6.80089	6.74969	6.72633
			7.52984	7.10254	6.96488	6.94804	6.98771	7.13951	7.157	7.23682	7.18113	7.19367	7.25498	7.28534	7.28477	7.31602	7.3661	7.33838	7.31279	7.33926	7.31622	7.36248	7.26952	7.26253	7.17527	7.1932	7.15269	7.22238	7.16944	7.14755	7.08145	7.13217	7.17019	7.07598	7.04125	6.99199	6.87383	6.80484	6.86262	6.93109	6.89861	6.94991	6.9953	6.94645	6.92152	6.93821	6.90133	6.81869	6.82765
	7.52423	7.55185	7.38509	7.09256	6.9326	6.9171	6.87945	6.94361	6.93879	7.02756	7.0236	7.06689	7.05706	7.05989	7.12469	7.09931	7.08699	7.07138	7.12402	7.13853	7.08453	7.07988	7.04458	7.03466	7.05393	7.02179	7.06004	7.08076	7.06778	7.0772	7.13069	7.07825	7.05843	6.98579	7.01345	6.98867	6.96188	6.84177	6.84945	6.923	6.96743	6.93063	6.89672	6.93863	6.87171	6.86835	6.87293	6.80182	6.73835
																		7.36728	7.45486	7.37241	7.40526	7.44761	7.33353	7.32198	7.30035	7.22842	7.26761	7.25896	7.21475	7.1551	7.13005	7.09039	6.97451	6.95605	6.96136	6.95894	6.91069	6.94336	6.95504	6.94508	6.93897	6.89748	6.89337	6.89527	6.89118	6.88743	6.80274	6.8408	6.77928
		7.44187	7.3421	7.04956	6.94125	6.94797	6.90046	6.92393	7.00615	7.04544	7.11278	7.0952	7.08743	7.17937	7.19427	7.22211	7.28448	7.29473	7.30819	7.34202	7.32956	7.33662	7.27068	7.26216	7.25771	7.19273	7.14061	7.08288	7.06754	7.00285	6.97853	6.96727	6.95298	6.91945	6.90915	6.88936	6.9288	6.87407	6.89531	6.90037	6.85174	6.86309	6.86251	6.77535	6.84191	6.86242	6.82286	6.74029	6.75573
																								7.23773	7.24542	7.29798	7.18006	7.23942	7.23006	7.20911	7.2114	7.14795	7.15765	7.09542	7.0966	7.01405	7.03171	7.08187	6.98793	6.99958	6.97085	6.91572	6.87585	6.92113	6.8673	6.84595	6.8519	6.78792	6.7553
7.63359	7.6821	7.5699	7.2866	7.08666	6.81651	6.84454	6.88398	6.90775	6.90725	6.92766	7.02931	7.02906	7.05799	7.05949	7.09067	7.16216	7.23138	7.24922	7.24551	7.25459	7.27674	7.26334	7.23152	7.25318	7.29799	7.27585	7.20801	7.15011	7.18937	7.15702	7.10643	7.08338	7.0483	7.09081	7.0278	6.97952	7.0171	7.02389	6.9814	6.983	6.96519	6.97463	6.91718	6.90482	6.90391	6.91286	6.88857	6.80426	6.79187
						6.90335	7.00327	6.83419	6.87008	6.95488	6.9254	7.09882	7.07476	7.19045	7.1413	7.14904	7.28613	7.2294	7.30066	7.29449	7.30089	7.29552	7.25127	7.17173	7.30279	7.22502	7.21494	7.14561	7.09972	7.07986	7.07638	7.08384	7.05412	7.05397	7.02138	6.95809	7.00444	6.96481	6.97002	6.97576	7.02378	7.02136	7.01129	6.98658	6.99049	6.96075	6.95407	6.8882	6.86622
7.62765	7.60751	7.55303	7.32468	6.99686	6.74444	6.77587	6.77572	6.74649	6.72424	6.74695	6.80874	6.95771	6.94851	7.09197	7.04392	7.08492	7.11202	7.14931	7.1265	7.10943	7.20737	7.16223	7.09898	7.1038	7.07507	7.02975	7.01249	6.96746	6.94945	6.94672	6.94292	6.94872	6.93269	6.91578	6.89897	6.84942	6.84459	6.87699	6.90165	6.8488	6.88094	6.89024	6.85959	6.82236	6.84709	6.85843	6.83492	6.77686	6.76848
7.72693	7.70807	7.5862	7.35219	6.96605	6.8553	6.9305	7.01033	7.02887	7.01738	7.06975	7.13114	7.16291	7.15896	7.11877	7.15154	7.21606	7.21049	7.22398	7.27225	7.27639	7.33411	7.331	7.31813	7.27903	7.2696	7.2055	7.19465	7.18549	7.1502	7.11312	7.08968	7.10527	7.08895	7.10003	7.08231	7.07111	7.04632	7.04593	7.0272	7.07331	7.08571	7.0931	7.06817	7.02386	7.00947	6.99304	6.98025	6.9066	6.86352
7.71162	7.62927	7.58544	7.4176	7.02252	6.83672	6.95203	7.03682	7.09228	7.09372	7.13615	7.13399	7.15307	7.07355	7.09989	7.07413	7.07726	7.1317	7.10686	7.13113	7.0913	7.15654	7.14521	7.14151	7.1612	7.16385	7.10666	7.07165	7.07801	7.09498	7.07017	7.04182	7.06108	7.01733	7.02529	7.0111	7.1029	7.10673	7.14002	7.1394	7.15894	7.05865	7.06957	7.01996	7.00187	6.94383	6.95852	6.94822	6.86475	6.90203
	7.89065	7.18719	7.44033	6.99824	6.95026	6.93572	6.96416	6.9828	7.04894	7.09613	7.09901	7.14281	7.14161	7.16749	7.15786	7.14196	7.15845	7.16959	7.24468	7.24558	7.26657	7.24506	7.27857	7.22231	7.22491	7.1345	7.13375	7.11964	7.0989	7.09266	7.08889	7.06202	6.99528	7.00357	7.00496	6.99239	7.01708	6.98606	6.98006	6.98006	7.00092	6.98905	6.99383	6.95452	6.95275	6.97891	7.00308	6.9232	6.86917
															7.1852	7.35796	7.34103	7.33302	7.39526	7.28886	7.29206	7.43506	7.40212	7.42428	7.37931	7.34332	7.30987	7.30193	7.2429	7.24478	7.22042	7.17522	7.14293	7.1194	7.11121	7.11172	7.08649	7.09088	7.04095	7.06371	7.07038	7.04958	7.07147	7.04163	7.01336	7.02255	7.01017	6.93131	6.91244
7.76736	7.72179	7.69192	7.54169	7.19871	6.95708	6.93194	6.94947	6.89788	6.9298	6.94133	7.01649	7.08775	7.14908	7.12083	7.17082	7.28356	7.32055	7.30023	7.30186	7.30613	7.31634	7.30015	7.31751	7.26432	7.24384	7.27306	7.18528	7.16215	7.15463	7.14673	7.10972	7.12976	7.08358	7.08445	7.07785	7.07283	7.05656	7.04379	7.02067	7.04201	7.09078	7.05757	7.04263	7.02064	6.97538	6.93839	6.97828	6.85837	6.84789
	7.9417	7.75583	7.56589	7.23227	7.07601	7.06024	7.11548	7.05547	7.22815	7.19339	7.19568	7.17145	7.20724	7.23235	7.2319	7.20585	7.31239	7.31376	7.37266	7.35909	7.35719	7.41856	7.36594	7.31637	7.30242	7.28159	7.2719	7.21267	7.17309	7.13519	7.09977	7.11128	7.09475	7.04984	7.04581	7.03928	7.05974	7.03076	7.04772	7.04727	6.99218	7.00955	7.04205	6.97964	7.00557	6.95407	6.98424	6.82376	6.82735
																				7.42805	7.43413	7.43852	7.37617	7.43407	7.35043	7.3507	7.27779	7.26321	7.26335	7.27875	7.18763	7.16496	7.17758	7.12976	7.11085	7.11483	7.10711	7.10874	7.07325	7.09412	7.06295	7.06564	7.0844	7.11589	7.08211	7.0472	7.04612	6.97042	7.03035
[truncated: 113 more columns]

## Sheet: pHFreeze
pHFreeze
6.28718
5.94403
6.39074
6.42099
6.44996
6.60481
5.91086
6.26992
5.88724
6.26493
6.33777
6.13655
6.01096
6.04532
5.8922
6.11733
5.95418
6.0792
5.90884
5.90048
6.23919
6.46302
6.04934
6.24057
6.06583
6.04586
5.92692
6.03012
5.87865
5.80464
6.07038
6.04087
5.87833
6.43882
6.43872
5.9224
6.04362
6.09644
6.12406
5.89427
