# Supplementary material for: Monitoring single-cell dynamics of entry into quiescence during an unperturbed life cycle
Source: eLife. 2021 Nov 1;10:e73186. doi: 10.7554/eLife.73186 (PMC8594939; doi:10.7554/eLife.73186)
Supplement: Figure 3—source data 3. [file elife-73186-fig3-data3.xlsx]

## Sheet: ratio
ratio
		0.747658	0.792311	1.05658	1.51921	1.7058	1.88528	1.91875	1.97295	2.01353	2.05736	2.03599	2.04039	2.13137	2.04217	1.75856	1.76021	1.82584	1.84059	1.81568	1.86672	1.89105	1.85218	1.5128	1.68794	1.75495	1.78609	1.76433	1.78902
	0.768489	0.831836	0.824413	1.08941	1.41551	1.7031	1.8123	1.87188	1.9355	1.97495	2.0301	2.01271	1.99782	2.02949	2.01262	2.01188	1.98055	2.00116	1.99841	1.99024	1.99418	1.99188	1.97593	1.99234	2.01204	2.02158	2.05434	2.02938	1.86044
		0.794403	0.83074	1.04224	1.51871	1.807	1.91048	2.0872	2.11654	2.15329	2.26481	2.2683	2.23687	2.32273	2.29548	2.30145	2.31637	2.22534	2.22023	2.21699	2.11959	2.19336	2.16127	2.20025	2.25243	2.21982	2.32962	2.22217	2.16683
	0.731168	0.794491	0.834948	1.07328	1.60034	1.75841	1.94813	2.03346	2.14932	2.21187	2.17333	2.16621	2.20145	2.26142	2.20749	2.17867	2.1776	2.11486	2.14007	2.17088	2.20122	2.15031	2.09014	2.18992	2.11341	2.28914	2.24169	2.17388	2.25483
	0.734021	0.799222	0.884267	1.1848	1.71986	1.92361	2.01699	2.12656	2.28859	2.27885	2.25935	2.25835	2.36278	2.34344	2.28232	2.25752	2.22855	2.31068	2.2163	2.25294	2.20401	2.22138	2.18441	2.22397	2.23925	2.29042	2.32745	2.32282	2.34661
	0.78207	0.853521	0.914827	1.25385	1.71961	1.85831	1.96325	2.09888	2.12444	2.15767	2.15178	2.22235	2.21101	2.15054	2.15906	2.20177		2.18317	2.14604	2.14478	2.15034	2.11183	2.12416	2.1001	2.17601	2.09001	2.05697	2.10279	2.17828	2.14078	2.10545	2.19335	2.13142	2.09154	2.00779		2.04507	1.9775	1.92103	1.84788	1.86229	1.84808	1.74288	1.74009	1.71094	1.76114	1.74456	1.76381	1.75306
		0.816835	0.894258	1.16378	1.58228	1.7906	1.97244	2.02373	2.00267	2.09403	2.0989	2.05746	2.08156	2.03319	2.03379	1.99692		1.98027	1.93854	1.95166	1.88349	1.89486	1.89492		1.87311	1.82837	1.89584		1.88512	1.84417	1.88522	1.89858	1.91042	1.87972	1.91208	1.93507	1.87899	1.85494	1.8357
		0.811199	0.900965	1.1781	1.56946	1.8185	1.92991	2.01099	2.05322	2.08988	2.10884	2.09609	2.12066	2.12698	2.11108	2.14217	2.0558	2.0867	2.04184	2.00137	2.06752	2.04832	2.04672	2.1236	2.06614	2.08412	2.0825	1.7461	1.80633	1.8363	1.95635	1.94744	1.94581	1.96665	1.95396	1.91771	1.90889	1.87706	1.84586	1.76953	1.7549	1.74604	1.72179	1.71761	1.64449	1.71727	1.71912	1.77208	1.7224
		0.849181	0.935496	1.12447	1.53639	1.72188	1.83661	1.94984	1.94758	2.0453	1.95837	1.96528	1.96785	1.98182	1.94747	1.95441	1.92997	1.89187	1.91849	1.85457	1.88798	1.85964	1.84825	1.88782	1.90986	1.9773	1.89938	1.91647	1.96432	1.95069	1.86518	1.83696	1.88079	1.96204	1.94077	1.85374	1.9503	1.84075	1.81675	1.71303	1.67296	1.6708	1.63445	1.58917	1.61709	1.61793	1.59082	1.59862	1.62866
		0.77615	0.824704	1.08967	1.60815	1.76302	1.86808	1.96273	1.95742	2.09377	2.03218	2.0927	2.07568	2.13551	2.06323	2.08701	2.09527	2.06462	2.01306	2.02802	1.98901	2.03771	1.97057	2.01394	2.03135	2.11403	2.08712	2.08689	1.99771	2.09207	2.12833	2.10647	2.11178	2.07734		1.99642	1.97548	1.89371	1.80092
0.729828	0.754408	0.794238	0.851924	1.12239	1.59586	1.8364	1.95489	2.07177	2.15701	2.1796	2.18895	2.16767	2.2145	2.22311	2.21126	2.12433	2.15702	2.19802	2.08053	2.11047	2.10229	2.07349	2.06366	2.09329	2.12671	2.10593	2.16673	2.1107	2.12189	2.13005	2.11997	2.12536	2.1629	2.00639		1.9146	1.91258	1.88567	1.85638	1.83908	1.80819	1.73538	1.75329	1.71032	1.71284	1.71306	1.73242	1.78188	1.77885
		0.700671	0.787616	1.02559	1.42315	1.47432	1.53906	1.67315	1.65552	1.71657	1.7031	1.70127	1.75207	1.79122	1.72657	1.73016	1.71196	1.70267	1.69858	1.67738	1.6752	1.62826	1.66989	1.67831	1.6853	1.71788	1.71396	1.67956	1.73372	1.72046	1.69976	1.67512	1.64982	1.63712	1.59007	1.54631	1.54309	1.49187	1.47693	1.49695	1.51806	1.40236	1.39355	1.39545	1.42008	1.38469	1.24161	1.41329	1.45163
		0.696931	0.78891	1.04198	1.52157	1.71881	1.87172	2.03493	2.07181	2.06709	2.09972	2.08004	2.0826	2.12745	2.10156	2.10106	2.07759	2.07104	2.07683	2.03071	2.02818	1.9825	2.00837	2.02461	2.12019
		0.778018	0.821246	1.11117	1.57423	1.7869	1.88174	1.99204	1.99968	2.06881	2.12265	2.09879	2.14863	2.21189	2.15982	2.1486	2.16843	2.16667	2.14429	2.10955	2.12027	2.03359	2.05715	2.09344	2.08146	2.15927	2.10194	1.81532	1.90576	1.91256	2.00843	2.04369	2.05704	2.04192	2.10422	2.12751	2.10739	2.10486	2.07581	2.05214	2.07599	2.06311	1.98673	2.00877	1.94767	1.94921	1.95424	1.96415	1.99487
		0.767018	0.839726	1.04606	1.4952	1.6873	1.84032	1.8358	1.86753	1.87514	1.81335	1.75157	1.71065	1.80082	1.76437	1.65704	1.60062	1.57016	1.58887	1.62646	1.59356	1.59811	1.60963	1.67255	1.66329	1.77008	1.76996	1.80814	1.74177	1.81961	1.81658	1.67552	1.7551	1.69624	1.62715	1.65939	1.67583	1.51765	1.48678	1.50216	1.51488	1.51372	1.4736	1.5343	1.47728	1.51461	1.49934	1.57916	1.565
			0.816878	1.13983	1.62065	1.77202	1.6982	1.93152	1.91837	1.9406	1.95991	2.03087	2.04689	1.97889	1.98279	1.98818	1.90929	1.96781	1.9489	1.82561	1.88318	1.87628	1.90463	1.89546	1.85726	1.88742	1.98869	1.9777	1.95825
0.746177	0.764507	0.798625	0.844792	1.14999	1.56382	1.84536	1.97828	2.10023	2.20826	2.19549	2.25976	2.25417	2.32387	2.27892	2.28897	2.22626	2.22921	2.22649	2.2073	2.20087	2.18443	2.17738	2.21274	2.01415	2.09274	2.07671	2.19972	2.2126	2.21208	2.22	2.20099	2.22124	2.18986	2.11865	2.01154	1.98479	1.92035	1.8633	1.83087	1.76685	1.77361	1.70244	1.68992	1.66348	1.63738	1.63891	1.6003	1.64578	1.65992
0.743821	0.755227	0.797869	0.956287	1.23602	1.57578	1.76472	1.96526	2.06627	2.06665	2.23608	2.18028	2.05125	2.02373	2.10923	2.1141	2.12972	2.17925	2.11985	2.28508	2.17788	2.10058	2.16236	2.05947	2.13504	2.11866	2.18413	2.23672	2.16312	2.20705	2.19575	2.11213	2.09697	1.89343	1.80211	1.74915	1.72648	1.65495	1.60437	1.59653	1.56933	1.54992	1.54988	1.52503	1.44435	1.48009	1.47225	1.50043	1.52503	1.58058
0.716617	0.748418	0.749756	0.808952	1.04366	1.42664	1.68407	1.8487	2.00557	2.06014	2.12559	2.15118	2.17106	2.14401	2.19385	2.21296	2.255	2.18753	2.20567	2.17984	2.1846	2.19169	2.08357	1.93949	1.97496	2.01251	2.07798	2.19082	2.06834	2.10884	2.13628	2.14604	2.06008	2.11633	2.12318	2.01512	2.02533	1.95077	1.92779	1.87747	1.83303	1.78889	1.76348	1.72045	1.68342	1.65861	1.64626	1.67977	1.70772	1.73521
0.747946	0.749385	0.832005	0.844359	1.04717	1.42841	1.68662	1.87989	2.00403	2.0747	2.17391	2.17501	2.15966	2.17872	2.2383	2.22921	2.0543	2.06638	2.09861	2.13455	2.10522	2.10339	2.02501	2.052	2.11186	2.15098	2.12894	2.10352	2.13601	2.15147	2.13492	2.14158	2.10735	2.19614	2.14584	2.07705	2.02543	1.97683	1.94424	1.89591	1.84599	1.7769	1.75244	1.77253	1.71892	1.67509	1.68736	1.66787	1.66294	1.67792
0.733874	0.776455	0.79596	0.86622	1.1225	1.50359	1.79546	1.89191	1.99414	2.04508	2.15137	2.12643	2.18367	2.14631	2.1206	2.17723	2.20756	2.17239	2.14324	2.10553	2.0973	2.14642	2.09855	2.10372	2.14876	2.14743	2.18902	2.22749	2.18975	2.26195
0.700262	0.696122	0.748292	0.771211	0.964143	1.52315	1.76603	1.87109	1.96121	1.96325	2.01361	2.00594	2.07715	2.03546	2.07399	2.06359	2.09557	2.06576	2.03323	2.02156	2.03812	2.01413	1.98281	1.99008	1.97224	1.96131	1.96695	1.94627	1.95645	1.98469	1.95258	1.94725	1.91152	1.93777
0.648706	0.681541	0.709014	0.728819	0.930237	1.42165	1.7032	1.78925	1.83298	1.94005	1.95568	1.99286	1.99534	2.06425	2.06523	2.08984	2.11351	2.09673	2.11402	2.08783	2.0715	2.07059	2.01634	2.0249	2.03822	2.00598	2.00183	1.96736	1.99966	1.99032	1.96516	1.97493	1.94919	1.95978	1.92655	1.89698	1.8636
0.705089	0.697389	0.727476	0.767523	0.8596	1.36795	1.71886	1.84384	1.89694	1.96776	2.01182	2.02314	2.00199	2.03675	2.08141	2.01727	1.98292	1.97279	1.95907	1.91305	1.88657	1.82135	1.86273	1.86719	1.85467	1.84765	1.8805	1.87905	1.8526	1.85616	1.85218	1.65776	1.62455	1.60577	1.53109	1.47049	1.48907	1.45676	1.38679	1.37208	1.36632	1.34596	1.33667	1.3284	1.34422	1.29734	1.29405	1.10556	1.12661	1.12891
	0.715274	0.755638	0.80103	0.882682	1.30227	1.72104	1.82278	1.90875	2.01905	2.07734	2.10076	2.09878	1.8458	1.96386	2.03671	2.04643	1.98888	2.00342	1.99149	1.99232	1.98956	1.99708	1.99078	1.95337	1.97419	1.94777	1.96706	1.95111	1.96013	1.98784	1.96476	1.97116	2.01318	1.91881	1.92525	1.91877	1.85816	1.84776	1.79468	1.75246	1.75793	1.73547	1.6755	1.64155	1.61824	1.62299	1.61039	1.63524	1.64452
		0.722539	0.784369	0.894721	1.36359	1.64226	1.80501	1.91928	1.9259	1.93534	1.96212	2.02195	2.02675	2.02984	2.05772	2.06921	2.02459	2.02661	1.99019	2.00128	1.96372	1.96017	1.93646	1.96526	1.93789	1.91877	1.92658	1.94454	1.85766	1.86851	1.8409	1.8108	1.83941	1.73619	1.72232	1.68107	1.66153	1.6325	1.59793	1.53479	1.50049	1.45581	1.45098	1.41897	1.40151	1.41553	0.978254	0.999634	1.01745
0.716646	0.733142	0.783567	0.800109	0.850501	1.27551	1.47672	1.6543	1.76357	1.80836	1.87522	1.90277	1.9291	2.01074	1.94616	1.99296	1.99601	1.97848	1.91872	1.91679	1.97393	1.90688	1.94327	1.9442	1.92413	1.91607	1.87025	1.85875	1.911	1.76115	1.7945	1.83205	1.83053	1.83683	1.88513	1.88333	1.9315	1.86832	1.90777	1.82839	1.82598	1.80221	1.76996	1.70326	1.71295	1.72347	1.70422	1.66224	1.67788	1.68782
0.70177	0.734151	0.747975	0.808284	0.893101	1.38491	1.7651	1.85687	1.92259	1.98248	2.09466	2.06942	2.12483	2.12675	2.2104	2.13955	2.12711	2.1269	2.11368	2.06832	2.11262	2.05805	2.03443	2.06118	2.02245	1.99472	1.98931	1.84563	1.7914	1.74437	1.7749	1.72339	1.66902	1.63299	1.692	1.67071	1.56925	1.54215	1.4682	1.39603	1.48488	1.47766	1.43994	1.42454	1.3846	1.40293	1.36876	1.40078	1.39105	1.4731
0.716437	0.717801	0.742009	0.781888	0.898732	1.36488	1.71157	1.83078	1.89113	1.9923	2.03545	2.00956	2.02094	2.11905	2.06158	2.1157	2.08731	2.06927	2.08993	2.03118	2.01459	2.01455	1.99519	2.01808	2.00827	1.99854	1.9816	1.96914	1.95681	1.95888		1.91327	1.95957	1.97117	1.87817	1.90541	1.68742	1.70365	1.7407	1.59225	1.62397	1.61104	1.59467	1.58577	1.62485	1.50877	1.58524	1.59217	1.60248	1.60718
0.718505	0.714168	0.737285	0.745804	0.858516	1.24168	1.4799	1.67317	1.76852	1.84962	1.90161	1.96044	1.95518	2.0283	1.98445	2.02844	2.04016	2.01058	1.94247	1.96905	1.91892	1.89535	1.9471	1.93029	1.93909	1.86857	1.90865	1.86931	1.85124	1.90476	1.86503	1.89231	1.89389
0.721328	0.75562	0.814495	0.796421	0.950269	1.43236	1.65867	1.77565	1.90692	1.99069	2.03904	2.06785	2.15055	2.17506	2.15938	2.18197	2.2545	2.1478	2.20499	2.20467	2.1989	2.22491	2.22648	2.22572	2.23906	2.20906	2.20816	2.26701	2.2888	2.19692
0.741054	0.747944	0.816899	0.793706	0.989156	1.48513	1.81182	1.89555	2.0515	2.12289	2.11354	2.16575	2.25785	2.266	2.35377	2.26706	2.26901	1.88348	1.94143	2.03325	2.06799	2.06568	2.07755	2.0934	2.07487	2.08189	2.1216	2.15889	2.14292	2.21431
[truncated: 113 more columns]

## Sheet: tfreeze
tfreeze
8
14
10
10
8
8
9
9
12
13
9
10
11
10
12
7
0
6
0
0
11
8
9
7
8
8
9
0
0
0
0
0

## Sheet: pH
pH
		7.61852	7.52132	7.03902	6.43051	6.2364	6.06877	6.03929	5.99261	5.9585	5.92242	5.93992	5.9363	5.8632	5.93484	6.18537	6.18379	6.12246	6.10897	6.13181	6.08535	6.06365	6.09846	6.4376	6.25405	6.18881	6.15934	6.17988	6.15659
	7.57247	7.43975	7.45477	6.98775	6.54899	6.23906	6.13493	6.08073	6.02473	5.99092	5.94477	5.95918	5.97162	5.94527	5.95926	5.95987	5.98618	5.96883	5.97113	5.978	5.97468	5.97662	5.99009	5.97623	5.95974	5.95181	5.92488	5.94536	6.091
		7.5169	7.44196	7.06191	6.43106	6.13984	6.04653	5.89829	5.8749	5.84606	5.76145	5.75886	5.78225	5.71913	5.73891	5.73456	5.72373	5.79091	5.79476	5.79721	5.87249	5.81516	5.83986	5.8099	5.77063	5.79507	5.71417	5.79329	5.83555
	7.65589	7.51672	7.43349	7.01273	6.34335	6.18551	6.01383	5.942	5.84915	5.80108	5.83054	5.83603	5.80899	5.76396	5.8044	5.82642	5.82724	5.87623	5.85637	5.83242	5.80917	5.84838	5.89593	5.81779	5.87738	5.74354	5.77864	5.83011	5.76885
	7.64936	7.50677	7.33733	6.84709	6.22266	6.03505	5.95562	5.86699	5.74395	5.7511	5.76549	5.76623	5.69049	5.70426	5.74854	5.76685	5.78849	5.72785	5.79773	5.77025	5.80704	5.79389	5.82202	5.79194	5.78046	5.7426	5.71574	5.71907	5.70199
	7.54312	7.39663	7.2804	6.75218	6.22289	6.09292	6.00088	5.88894	5.86866	5.84265	5.84723	5.79316	5.80173	5.8482	5.84157	5.80875		5.82296	5.8517	5.85269	5.84835	5.87864	5.86888	5.88797	5.82846	5.89603	5.92274	5.88582	5.82672	5.85581	5.8837	5.81517	5.86316	5.89481	5.96328		5.93246	5.98876	6.0373	6.10235	6.08934	6.10217	6.20037	6.20305	6.23137	6.18291	6.19876	6.18037	6.19062
		7.47024	7.3185	6.87709	6.36236	6.15511	5.99305	5.95003	5.96756	5.89282	5.88892	5.92233	5.90282	5.94222	5.94172	5.97238		5.98641	6.0221	6.01079	6.07037	6.06029	6.06023		6.07963	6.12014	6.05942		6.06892	6.10572	6.06883	6.057	6.04658	6.07373	6.04512	6.0251	6.07438	6.09596	6.11344
		7.48184	7.30598	6.8566	6.37599	6.12921	6.02958	5.96062	5.92579	5.89614	5.88101	5.89116	5.87164	5.86666	5.87923	5.85473	5.92369	5.89869	5.93511	5.96865	5.91416	5.92979	5.93111	5.86932	5.91528	5.90076	5.90206	6.19728	6.14046	6.11289	6.00677	6.01442	6.01582	5.99797	6.00883	6.0402	6.04793	6.0761	6.10419	6.17495	6.18886	6.19734	6.22077	6.22485	6.29774	6.22518	6.22338	6.17254	6.22018
		7.40517	7.24296	6.93467	6.41167	6.22068	6.1126	6.01236	6.0143	5.93227	6.00505	5.99914	5.99695	5.9851	6.0144	6.00844	6.02952	6.06293	6.03952	6.0963	6.06638	6.09172	6.10202	6.06652	6.04707	5.98893	6.0563	6.04128	5.99996	6.01163	6.08673	6.11228	6.07278	6.00191	6.02017	6.09705	6.01196	6.10883	6.13082	6.22933	6.26898	6.27115	6.308	6.35508	6.3259	6.32502	6.35334	6.34514	6.31395
		7.55585	7.45418	6.98734	6.33519	6.18112	6.08413	6.00131	6.00586	5.89303	5.94305	5.89388	5.90756	5.85994	5.91765	5.89844	5.89183	5.91651	5.9589	5.94649	5.97903	5.9385	5.99463	5.95816	5.94374	5.87689	5.89835	5.89853	5.97171	5.89438	5.86559	5.88289	5.87867	5.90622		5.9728	5.99047	6.0613	6.14549
7.65896	7.60346	7.51725	7.39977	6.93778	6.34804	6.11279	6.00803	5.91072	5.84316	5.82571	5.81853	5.8349	5.79909	5.79259	5.80154	5.86874	5.84316	5.8116	5.90365	5.87971	5.88622	5.90933	5.91729	5.89341	5.86687	5.88332	5.83563	5.87953	5.87067	5.86424	5.87219	5.86793	5.83859	5.96446		6.04292	6.04468	6.06843	6.09466	6.11035	6.13874	6.2076	6.1904	6.23197	6.22951	6.22929	6.21046	6.1633	6.16614
		7.72728	7.53128	7.08889	6.53997	6.48077	6.40876	6.26879	6.28654	6.22587	6.23906	6.24086	6.19156	6.15454	6.21613	6.21265	6.23037	6.23949	6.24352	6.26456	6.26674	6.31436	6.27205	6.26364	6.25666	6.22458	6.22841	6.26238	6.20921	6.22207	6.24235	6.26682	6.29232	6.30527	6.35413	6.40089	6.40438	6.46094	6.47781	6.45525	6.43178	6.56463	6.57518	6.5729	6.54358	6.58587	6.76862	6.55162	6.50676
		7.73624	7.52853	7.06234	6.42792	6.22368	6.08087	5.94079	5.91069	5.91451	5.88827	5.90405	5.90199	5.86629	5.8868	5.8872	5.90602	5.91131	5.90664	5.94427	5.94635	5.98453	5.9628	5.9493	5.87201
		7.55182	7.46122	6.95461	6.37091	6.15858	6.07193	5.97648	5.97007	5.91311	5.87007	5.88901	5.84969	5.80107	5.84098	5.84971	5.83432	5.83568	5.85307	5.88044	5.87195	5.94189	5.92259	5.89329	5.9029	5.84141	5.8865	6.13214	6.05068	6.04471	5.96275	5.93359	5.92268	5.93504	5.88468	5.86624	5.88216	5.88417	5.90746	5.92667	5.90731	5.91774	5.98095	5.96247	6.01422	6.0129	6.00858	6.00011	5.9741
		7.57568	7.42393	7.05579	6.45721	6.25468	6.10922	6.11334	6.08463	6.07781	6.13396	6.19204	6.23165	6.14558	6.17984	6.28501	6.34305	6.37524	6.35539	6.31622	6.35046	6.34568	6.33364	6.26939	6.27869	6.17443	6.17454	6.13878	6.20144	6.12819	6.13098	6.26642	6.18867	6.24582	6.31551	6.28263	6.26611	6.43223	6.46668	6.44942	6.43529	6.43658	6.48159	6.41395	6.47741	6.4356	6.45257	6.36566	6.38076
			7.47015	6.91194	6.32221	6.1726	6.24389	6.02818	6.03963	6.02032	6.00373	5.94413	5.93096	5.98758	5.98428	5.97973	6.04757	5.99699	6.01317	6.12267	6.07064	6.07679	6.05167	6.05975	6.09387	6.06687	5.9793	5.98858	6.00514
7.62184	7.58118	7.50802	7.41385	6.89707	6.38202	6.10464	5.98809	5.88787	5.80382	5.81353	5.76519	5.76934	5.71832	5.75104	5.74367	5.79022	5.78799	5.79004	5.80455	5.80944	5.822	5.82742	5.80042	5.95798	5.89385	5.90673	5.81031	5.80053	5.80092	5.79493	5.80934	5.794	5.81784	5.87323	5.96016	5.98259	6.0379	6.08843	6.11784	6.17749	6.17109	6.23971	6.25208	6.27851	6.305	6.30343	6.34338	6.29643	6.28209
7.62714	7.60164	7.50961	7.20613	6.77619	6.36926	6.17951	5.99916	5.91518	5.91487	5.78284	5.82518	5.9274	5.95003	5.8807	5.87683	5.8645	5.82597	5.87228	5.74652	5.82703	5.88758	5.83902	5.9207	5.86032	5.87322	5.82223	5.78236	5.83842	5.80474	5.81333	5.87839	5.89047	6.06155	6.14437	6.19436	6.21622	6.28712	6.33913	6.34734	6.37613	6.39699	6.39702	6.42411	6.51518	6.47423	6.48312	6.45136	6.42411	6.36416
7.68957	7.61682	7.61382	7.48649	7.05963	6.53586	6.2579	6.10161	5.96514	5.92016	5.86775	5.8477	5.83228	5.85329	5.81479	5.80025	5.76872	5.81962	5.80578	5.82552	5.82187	5.81644	5.90121	6.02128	5.99091	5.95935	5.90571	5.8171	5.9135	5.88101	5.85935	5.8517	5.92021	5.87507	5.86965	5.95718	5.94871	6.01156	6.03141	6.07573	6.11587	6.15672	6.18068	6.22208	6.25854	6.28342	6.29594	6.26217	6.23453	6.20777
7.61787	7.61465	7.43941	7.41471	7.05401	6.53378	6.25536	6.07358	5.96643	5.90836	5.83008	5.82924	5.84111	5.82638	5.78117	5.78799	5.92491	5.91509	5.88915	5.8607	5.88388	5.88534	5.94897	5.92679	5.87861	5.84786	5.86511	5.88524	5.85955	5.84747	5.86041	5.8552	5.88219	5.81304	5.85186	5.90646	5.94863	5.98932	6.01717	6.05936	6.10407	6.16799	6.19121	6.17211	6.22357	6.26685	6.25462	6.27408	6.27905	6.26402
7.6497	7.55519	7.51362	7.37188	6.93761	6.44784	6.15058	6.0629	5.97472	5.93245	5.84755	5.86709	5.82258	5.8515	5.87169	5.82753	5.80435	5.83126	5.85389	5.88364	5.8902	5.85141	5.8892	5.88508	5.84958	5.85062	5.81848	5.78929	5.81792	5.76356
7.72826	7.73819	7.6171	7.56655	7.19242	6.42618	6.17826	6.08144	6.00261	6.00088	5.95843	5.96483	5.90637	5.94035	5.90893	5.91735	5.89158	5.91559	5.94219	5.95183	5.93816	5.958	5.98426	5.97813	5.99322	6.00253	5.99772	6.01543	6.00668	5.98268	6.01001	6.01459	6.04561	6.02276
7.8564	7.77366	7.70744	7.66128	7.25241	6.54174	6.23896	6.15637	6.11592	6.02079	6.00735	5.97579	5.97371	5.91682	5.91602	5.89617	5.8773	5.89066	5.8769	5.89779	5.91094	5.91168	5.95616	5.94906	5.93808	5.9648	5.96827	5.99737	5.97009	5.97793	5.99925	5.99094	6.01291	6.00384	6.0325	6.05841	6.08816
7.71675	7.73515	7.66437	7.57458	7.38474	6.60625	6.22363	6.10602	6.05844	5.99703	5.95992	5.95053	5.96813	5.93929	5.90295	5.95539	5.98417	5.99275	6.00444	6.04427	6.06763	6.12659	6.08894	6.08493	6.0962	6.10256	6.07303	6.07433	6.09808	6.09486	6.09846	6.28428	6.31819	6.33767	6.41747	6.48513	6.46409	6.50085	6.58333	6.6012	6.60825	6.6334	6.64501	6.65541	6.63558	6.69505	6.69931	6.96308	6.93149	6.92807
	7.69272	7.60073	7.50298	7.34034	6.68869	6.2215	6.12526	6.04805	5.95391	5.90623	5.88744	5.88902	6.10424	6.00035	5.93932	5.93134	5.97914	5.96693	5.97694	5.97624	5.97857	5.97224	5.97754	6.00933	5.99156	6.01414	5.99763	6.01127	6.00354	5.98002	5.99958	5.99414	5.95879	6.03923	6.03363	6.03928	6.09306	6.10246	6.1513	6.19119	6.18597	6.20751	6.26644	6.30074	6.32471	6.31979	6.33285	6.30719	6.29771
		7.67578	7.5382	7.31764	6.6116	6.30002	6.14168	6.03883	6.03306	6.02487	6.00183	5.95151	5.94753	5.94498	5.92212	5.91279	5.94932	5.94765	5.97804	5.96873	6.00047	6.00351	6.0239	5.99916	6.02266	6.03928	6.03246	6.01692	6.0935	6.08375	6.10869	6.13632	6.11005	6.20682	6.22026	6.26088	6.28047	6.31	6.34587	6.41342	6.45129	6.50194	6.50752	6.5449	6.56563	6.54896	7.16808	7.13185	7.10225
7.6895	7.65137	7.53992	7.50491	7.40257	6.72348	6.47805	6.28778	6.1806	6.13858	6.07774	6.05331	6.03027	5.96082	6.01552	5.9757	5.97315	5.98792	6.03932	6.041	5.99178	6.04969	6.01801	6.01721	6.0346	6.04163	6.08219	6.09253	6.04607	6.18291	6.15147	6.11676	6.11816	6.1124	6.06891	6.07052	6.0282	6.08392	6.04891	6.12012	6.12233	6.14429	6.17454	6.2389	6.2294	6.21914	6.23796	6.27975	6.26406	6.25416
7.72465	7.64907	7.61781	7.48788	7.32067	6.5856	6.17914	6.09422	6.03594	5.98454	5.89231	5.91262	5.86835	5.86683	5.8022	5.85678	5.86655	5.86672	5.87717	5.91351	5.87801	5.92186	5.9412	5.91931	5.95109	5.97423	5.97878	6.1044	6.15436	6.19894	6.16987	6.21921	6.27293	6.3095	6.25002	6.27124	6.37622	6.40541	6.48775	6.5722	6.46881	6.47698	6.52031	6.53833	6.58598	6.56394	6.60526	6.5665	6.5782	6.48216
7.68999	7.68681	7.63123	7.54351	7.31014	6.61002	6.23075	6.11793	6.06359	5.97627	5.94036	5.96181	5.95235	5.87291	5.91899	5.87556	5.8982	5.91274	5.8961	5.94387	5.95762	5.95765	5.97383	5.95472	5.96289	5.97102	5.98529	5.99586	6.00638	6.00461		6.04409	6.00402	5.99413	6.07511	6.05098	6.25457	6.23852	6.20247	6.35183	6.31878	6.33218	6.34929	6.35866	6.31788	6.44208	6.35923	6.35192	6.3411	6.3362
7.68516	7.69531	7.64193	7.62268	7.38685	6.76853	6.47444	6.26877	6.17591	6.10077	6.05433	6.00328	6.00778	5.94625	5.98288	5.94614	5.93649	5.96096	6.0187	5.99593	6.03915	6.05985	6.01471	6.02925	6.02162	6.0837	6.04813	6.08304	6.09931	6.05155	6.08688	6.06254	6.06114
7.67859	7.60077	7.47505	7.51265	7.21671	6.52915	6.28335	6.16916	6.04966	5.97762	5.93741	5.91389	5.84819	5.8292	5.84132	5.82389	5.76909	5.85034	5.8063	5.80654	5.81093	5.79123	5.79004	5.79062	5.7806	5.80321	5.80389	5.75982	5.74379	5.81244
7.63339	7.61788	7.47011	7.51837	7.14951	6.46853	6.13537	6.05967	5.9272	5.86988	5.87727	5.83639	5.76661	5.76057	5.69689	5.75978	5.75834	6.07038	6.0196	5.94217	5.91379	5.91566	5.90606	5.89332	5.90822	5.90256	5.8709	5.8417	5.85414	5.79923
[truncated: 113 more columns]

## Sheet: pHFreeze
pHFreeze
6.06877
5.97162
5.8749
5.84915
5.95562
6.00088
5.95003
5.96062
6.00505
5.89388
5.91072
6.28654
5.91451
5.97007
6.13396
6.1726
6.36926
5.84755
6.08144
6.11592
6.22363
6.12526
6.14168
6.1806
