# Supplementary material for: Monitoring single-cell dynamics of entry into quiescence during an unperturbed life cycle
Source: eLife. 2021 Nov 1;10:e73186. doi: 10.7554/eLife.73186 (PMC8594939; doi:10.7554/eLife.73186)
Supplement: Supplementary file 1. [file elife-73186-supp1.xlsx]

## Sheet: Feuille 1
Name	Mating type	Strain Background	Genotype	Source	Additional information
WT	a	BY	his3∆1; leu2∆0; ura3∆0; met15∆0	PMID: 9483801	Euroscarf
BJQ-3	a	BY	his3∆1; leu2∆0; ura3∆0; met15∆0 Abp1-GFP	PMID: 14562095	Thermofisher
BJQ-7	a	BY	his3∆1; leu2∆0; ura3∆0; met15∆0 Gln1-GFP	PMID: 14562095	Thermofisher
BJQ-28	a	BY	his3∆1; leu2∆0; ura3∆0; met15∆0 Dhh1-GFP	PMID: 14562095	Thermofisher
BJQ-23	a	BY	his3∆1; leu2∆0; ura3∆0; met15∆0 Cdc28-GFP	PMID: 14562095	Thermofisher
BJQ3-3	a	BY	his3∆1; leu2∆0; ura3∆0; met15∆0 Scl1-GFP	PMID: 14562095	Thermofisher
Y10794	a	BY	his3∆1, leu2∆0, met15∆0, ura3∆0 ILV3-tdimer-URA3, Scl1-GFP-HIS3	PMID: 18504300	Sagot Lab
YSF120-9D	a	BY	his3∆1 leu2∆0 lys2∆0 trp1∆63 ura3∆0 TOM70-eGFP-CaURA3 PTDH3-preCOX4-Cherry-hphMX	PMID: 24332850	Charvin lab
SMY12	a	BY	leu2Δ0 met15Δ0, ura3Δ0 his3Δ1::PTEF1-pHluorin-HIS3	PMID: 32990592	Veenhoff lab
BJ2-44	a	BY	his3∆1; leu2∆0; ura3∆0; met15∆0 Tdh3-GFP	PMID: 14562095	Thermofisher
Y11453	alpha	BY		this study	Daignan-Fornier Lab
Y2658	alpha	S288c	gal2	PMID: 19795422	Daignan-Fornier Lab
Y2438	a	FY		PMID: 7762301	Daignan-Fornier Lab
Y2439	alpha	FY		PMID: 7762301	Daignan-Fornier Lab
Y12322	a/alpha	FY	Diploid	this study	Daignan-Fornier Lab
Y5738	a	FY	Rho°	PMID: 30299253	Sagot Lab
Y8037	a	W303	ILV3-tdimer-URA3 ura3-1, trp1-1, ade2-1, leu2-3,112, his3-11,15	PMID: 24338369	Sagot Lab
Y6735	a	BY	ILV3-tdimer-URA3, his3∆1; leu2∆0; met15∆0; ura3∆0	PMID: 24338369	Sagot Lab
BJQ-11	alpha	W303	his3-11,15, leu2-3,112, ura3-1, trp::GPD-ypHluorin2	PMID: 27003292	Alberti lab
