# Supplementary figures and images for: Monitoring single-cell dynamics of entry into quiescence during an unperturbed life cycle
Source: eLife journal article supplement (doi:10.7554/elife.73186), 2021-11-01

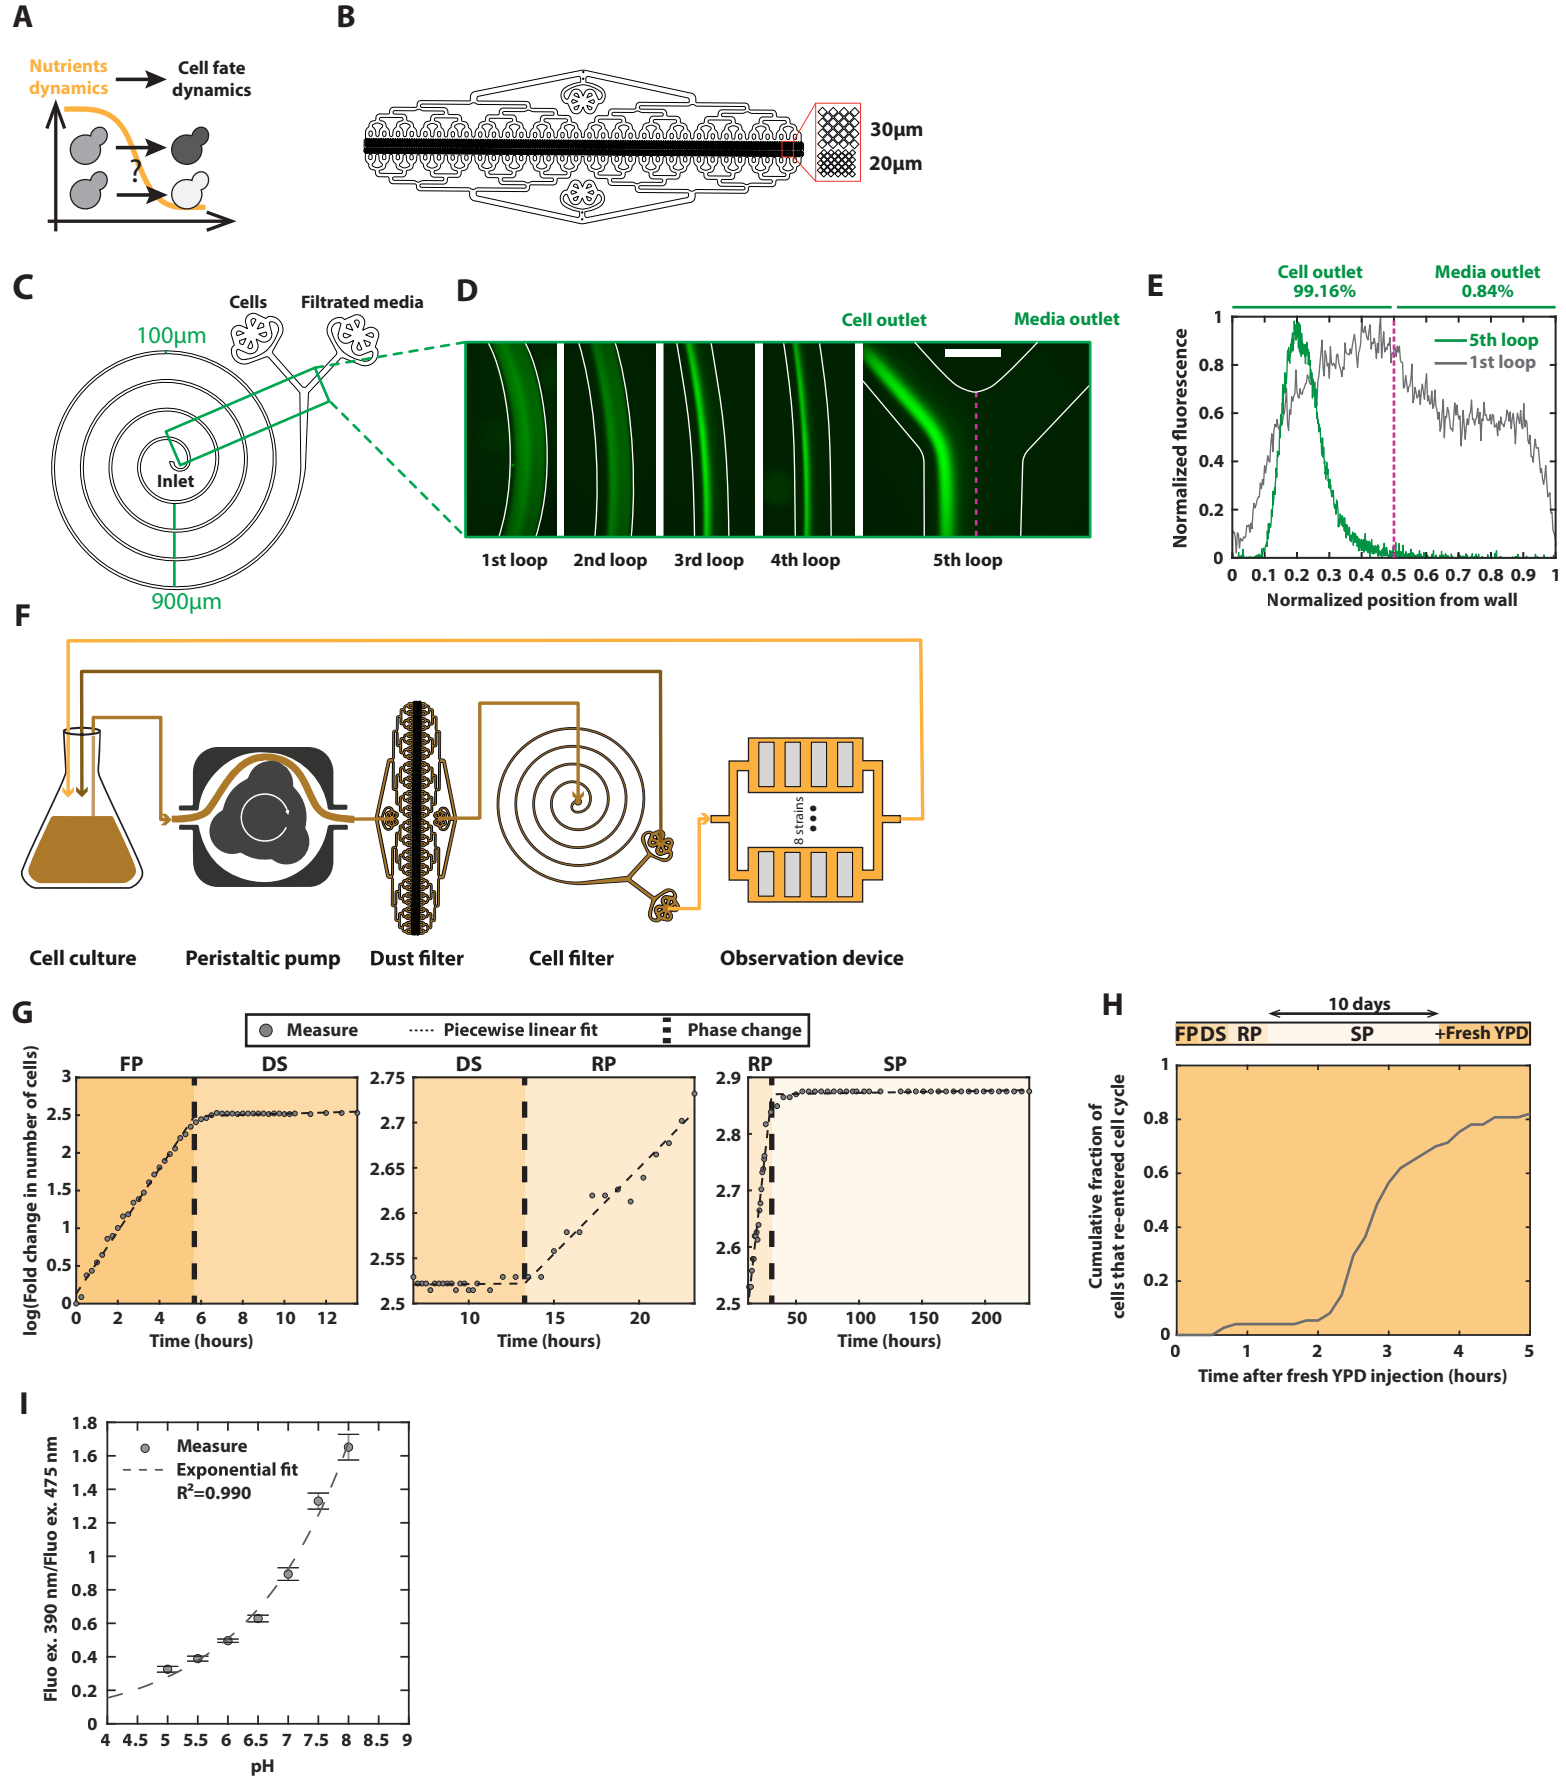

Supplement: supp [file elife_poa_e73186_Figure_1_figure_supplement_1.pdf › elife_poa_e73186_Figure_1_figure_supplement_1.pdf]

**A**

### Prototroph strains

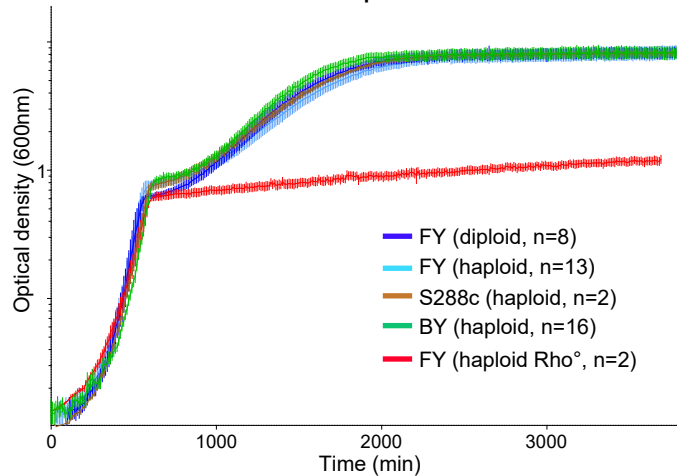**B**

### Auxotroph strains

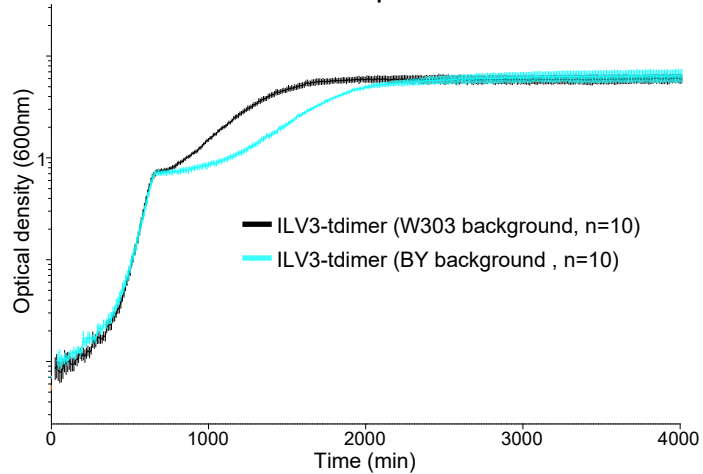

Supplement: supp [file elife_poa_e73186_Figure_1_figure_supplement_2.pdf › elife_poa_e73186_Figure_1_figure_supplement_2.pdf]

**A**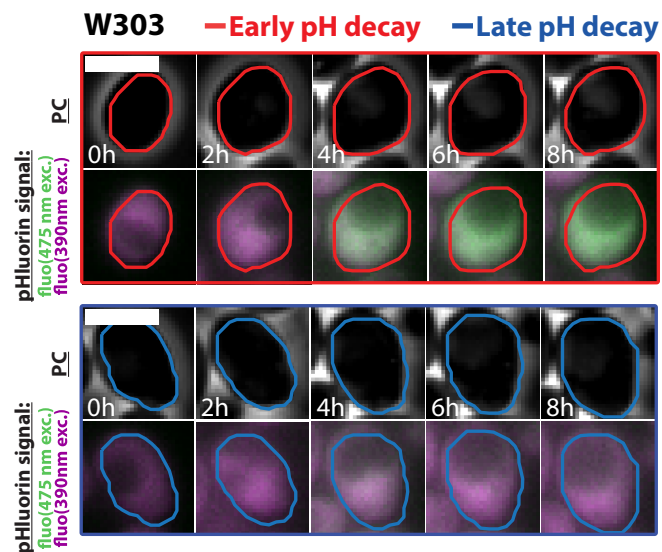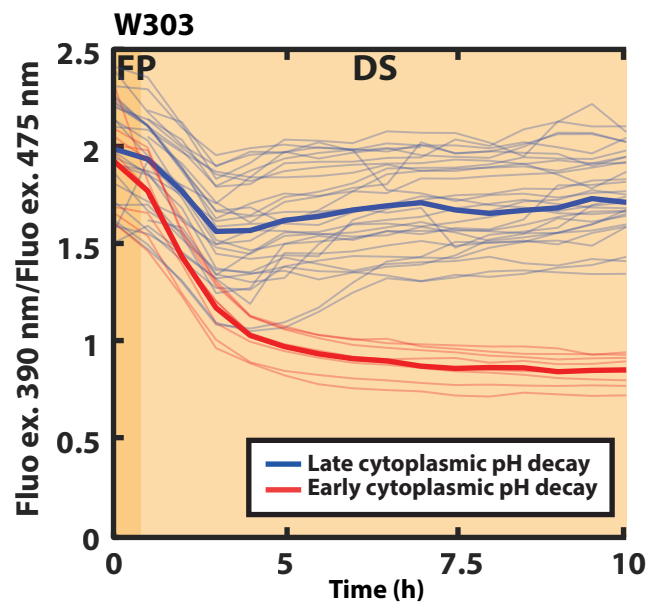**B**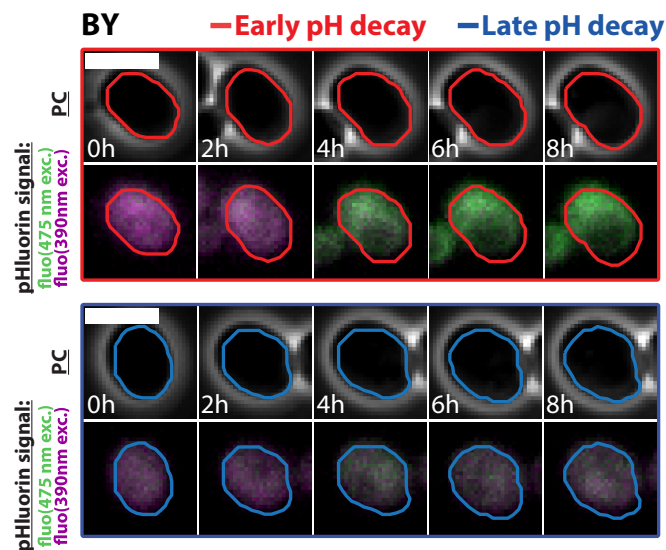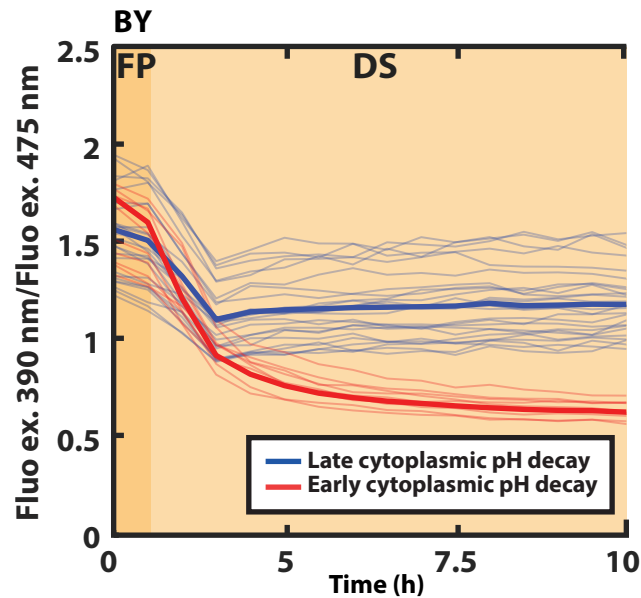

Supplement: supp [file elife_poa_e73186_Figure_1_figure_supplement_3.pdf › elife_poa_e73186_Figure_1_figure_supplement_3.pdf]

**A**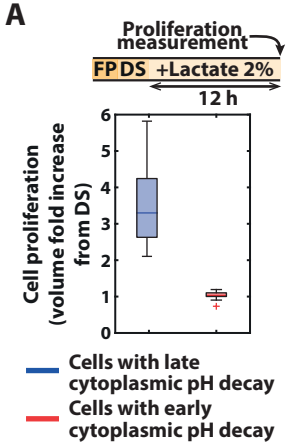**B**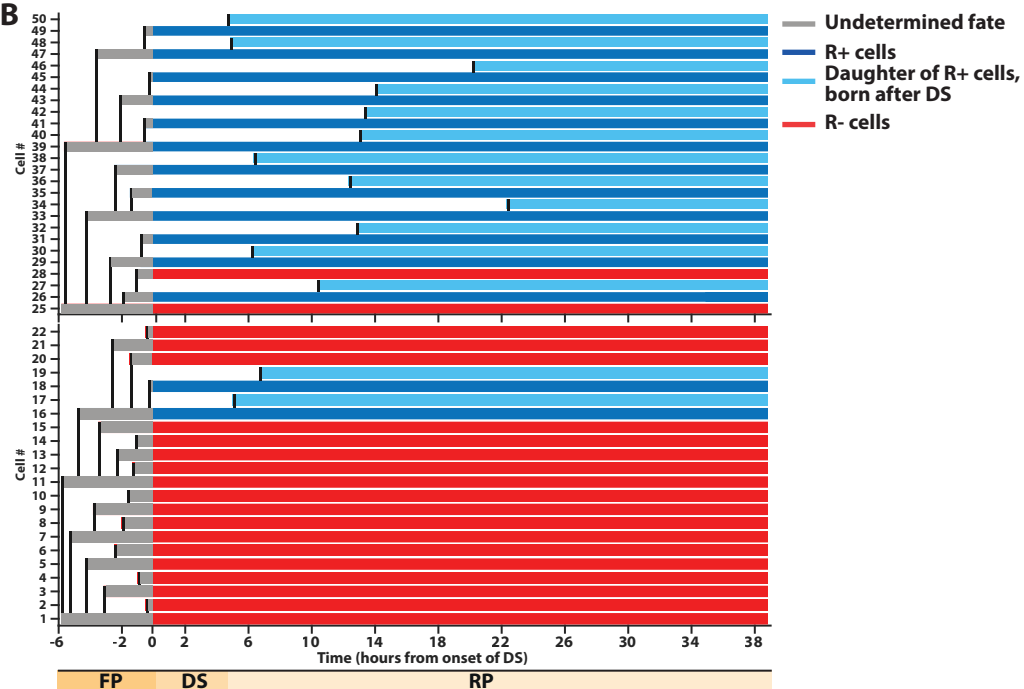

Supplement: supp [file elife_poa_e73186_Figure_2_figure_supplement_1.pdf › elife_poa_e73186_Figure_2_figure_supplement_1.pdf]

**A**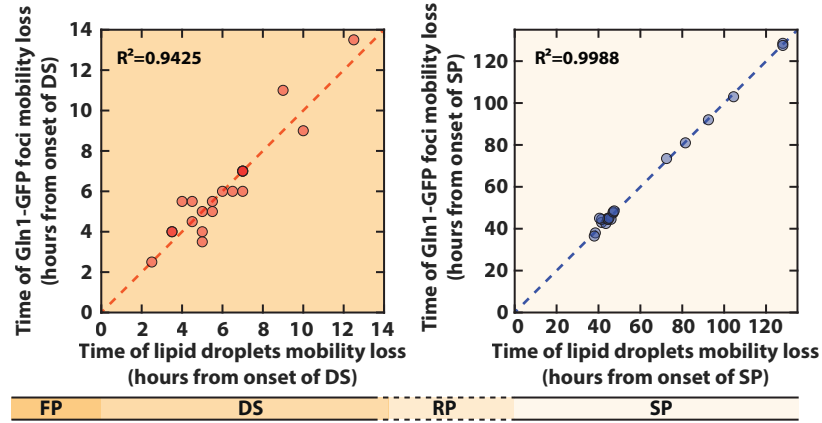**B**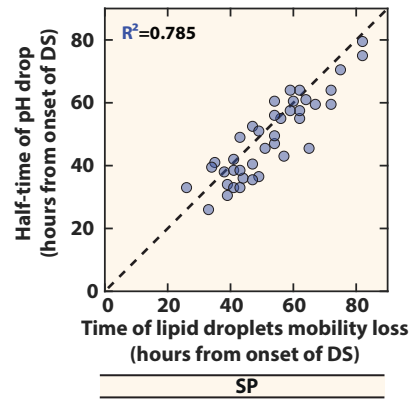

Supplement: supp [file elife_poa_e73186_Figure_3_figure_supplement_1.pdf › elife_poa_e73186_Figure_3_figure_supplement_1.pdf]
